# Supplementary material
Source: PubMed Central journal article supplement (PMC5703281)
Supplement: pnas.1706855114.sd01.pdf [file pnas.1706855114.sd01.pdf]

**Pax7 genomic contig, Pax7 coding sequences are highlighted in green, stop codon in red.**

CAGAGCACCAGAGTCAAATCACTACCGTAGGCACAGTGGGTAAAAGCTTGATTGTGGGGCAGGATCTCTAAGTTGTGTGTATCAGCTAGACAGTCTGTG  
GAAACCATCTTCAGATGTATTAGGGAGGTTATCCCTGATTGCCACAGAAAATGGAGGAAAGAAATCAAGAGAAACACTAGAAGTAGTCCATTAATGATAT  
ATTTCGAGTTAACTCTGCTGTTCCAATGACTAGCCTCTTTCCGGTTTACCTTATCTGTTAAGATTCCTTAGTCTTAAATGCTGTTTAGATGGCATCATTT  
TCTGTTGACTCAAFTCCCTCCCATATAATCTTTGTGGATTTTGTGACATACGTTAGACCCTGCTTCCCTTGCATCGTATTTGCCGAATAAACATAGATCGAACGGA  
TTATGCACTCGGAATGCTGTGGACCATTTGTGTAGACCAGAGGAGCTAATCAATATGGATCTAATATACACTGAAACCTAAGTGTTCGTGTAGTCTCTT  
TCCTTATCCCGTAAGGGTGGAGTATAAGTGGCTTTCTCCGGAACAAAGATCAAATCTTAGTACTACCCTCCCGGTCACTGTACCCGGATTAATTTTAC  
GAGCCGGCAGGGTCTCTATGTAAGAAAAGAAAGACAATCAAATCCGGCGTATTACCGAACGGTCAAATTTTGGCTGTGACCGTAAACGGGCGTTAGCAGGC  
GGCAGATGTGTGTTGTTCCAGCCGGGTAAATACTTCTGACATACGTTAGACCCTGCTTCCCTTGCATCGTATTTGCCGAATAAACATAGATCGAACGGA  
CCAAAATCCCATCTCGGAACGCTAACTTTTAAATATCCCGGTTACTCTCACCATTCTGTGTGAGGATACCAGGTCCACTTCTGTTAGAGCGATAAATCCTC  
TGTGTCTTCCCTGCGCCGATCGTTCGGGGGTGACCTAGGTTACTACGAGCATATCTGGAGTTAAGTCTATGCGTTCCAAACCGCGCATGCGCACTAG  
CCACTTTTGTCAACCGCCGTCAGGTGTTATTGGTTTACAGTTTTCAGATGGTACCACCGGTTATTAACCCCAAGTGTGCGGCTCGCTGGTCAAAGA  
TATCGAGTTCCGACATGCTGCTATGATGACTCCACCTCTCTGTGGAGCATCGTATACATTTAATGCAATTAAGTGTGAGGAGGAGG  
AATGATCATAGAATATTACGCTCGCAAGCAATAATTAGCTGTGGTCAAATGTCTCCCGTCTTATGCCACCAGTCAATTTTTTCAATTAAGTCTGTGTA  
CCATGCTATTTGTCAGAAAATAGTGTGTTCTTTAACAGCAATTTCTTTTGTCTTTATTGCTGTCTATACCAGGCTTTGTTTATATAAAACGGTCC  
AGCTTAGGTCATCCACTGAGTGTGTTGTTCAATCCAATGGTCTACAGTGGAGCATTTCTGGGTTTATTTCTGATACAACTCTTATGCTCTCAATTCGG  
ATTTTAAATCTCCCTATCTGTTTTCACCATAGATTCCTTTTGAAGGACCCCACTGCATACACCACCATGTTGAATGCAATTAAGTGTGAGGAGGAGG  
TTGCCATGGAGTGGTGGAGCCGATATCGACCGCTGTGCTCTGAACTGGAGGGGAGCATGTGCACCTACCCATTTGGGATGCCCAATAATTTCTTGG  
ATCCCATTTGCTGGGGTAGGGTTTCTGTGGTGGTTTACGGCTCACATCAATTTTTGTTTAGATGTTCTTTTCACTCCGACTCCTCTTAAAGCTATGA  
ATAGGCTTGAATGGTAACTACTATTTCCAGAAGATGCCAATCTTTCAATAACTTTCTAATTCATTTGAAAGTGGCTAAAAGTATTGACAAA  
CAATTTGTTAGCTTTGCTTTCATCGTCCGTTTCCCTGATTTCCAAAAGTGGCCCTCTGTGTTTATTTGCGCCGTTTAAATGCATTTGCCAGTGTG  
TTTTTGGGGTAGCTCTTTCTCCAGTTTATTTTTCATTTTGTGAGCTTCCAGTTTGAAGTCTTTTGTCTTAGTGTCTTCTTTTGTAGTCTCACAACTG  
TCCAGTGGTAAGTTGTCAGCTACATGGCAGGGTGAATAAGTGTAAACCAAGAAATTTCTGTCTGTTGGTTTGAATGGTTTAACTAGTTTAACTAGTTT  
TTGTTCACTGTCTCAGGTCAGGTTGTAATGTCTAGAAAATCAAGAAACCTGATTTGGTGGTGTGATGAAACCGGAAATCTTTTCCAGGTTGATG  
CAATCAAAGAAAATTCAGTGTGTTTTCATTACCTGTCCAGATAAAACAAAATATCATCTATATAACCGCCCATGAGTGGCCATCCATGCTGGATGATGA  
TGATACCTATTTAGCAAGGCCAAATCTTCCATAAATCTCCAGAAAGCGAAGGAGGATCTGGGGTATCATCTGCTTAGTTAGTGTAGGTGATACCAG  
ATGATCCAAATCATTTGAAAGGGGCTTGGTAAATATGTTATACAATGTGGGAGACACAGGAGCCCTGTGATACCCACAGGTGATCGGTACATGGTCTGC  
TGCAGCAGTGGGAGAGAAGACCCCTCATGTTCTGCCAATTAAGGAATGATGTGATCCAGGTGATGGCCCTCAGTAGAGAAGTGGCTGAAGAGTGGAGGTG  
TACATAGGACAGAGTATCGACCAAAATCGAAAGTGCAGATAAGTGCAGAGGAGGAGTAGGGCAGCTTGTCCATTGTCTCTGAGCGTGTGATCTGGGCTT  
TTAAGTCAATGAGTGGAGTTTTCAGTCCGCTGTTGAGGACGGAACCCCGATTGTCTGGATCTTAAGAGTGGTGAACCTTCAAGTGTCTCTGTATTTGTACA  
TAGGCGACCTTGTCCAAGATTTTGTAGTAGAAGGAAACGGTGTGTTATGGGTCGGCAATTTGTGGGTGTGGTGGGTCAGTGTAGGTTTTTTTTCAGTAGTG  
GAGTACCCAAGATTTTAAATTTGGTGGGATGGAGCCAGTGGCGAAGGAGCGCTTGTATGATTTTCTGTAATGAAAGGAAAGATTCACGGCAGCGCTTT  
GATAAGCTGTGCTGGGCACAGGCTCCTTGGCATTTGGATGGTTTCAAGGACAGCATGATTTTTTCAACTTCAAGTGTGTGACTTTGGAGAATTTGAAGTG  
GGTATATCTGTGGGCTGAGCTTGTCCGGAATTTTCCGAGGAGAGTACATTTGAGGAGGCTTTTTTGTCTGGAGATTTTACCTTGGAGGGTGTGATCTT  
ATTCGTTAGGGCACTTTGAATTTCTGAACACCCGTTTTTATCTTTAGTACAGGTGTCAGGGGTAFACTATGGGGTTTCTACTTTTAACTCTCTTCTCTAC  
TGCAATAACCTCTGAATACCGGTCGCGCGATGCCAATCCGAAAGGACTCCTCTATATCTGATGCTCCTCAGTGGGATGATGAATGGGAGGTTGGGCTCTC  
GACTCTTCTGTTCAATACCACCTGATGATATGCAGACGATAGATCTAATGTTGTGAAAACTTTGCTGGCTTCATAGTTGATAACATTTCACTTATGTTCCG  
TAAATGGATGCTTACCACCGATATTTGCGTTCAAGTCTCAGTCTACAAACATCTTATGGAACCATCTGATTTTCTGATACAAATACGATTTGGTGAAG  
CCATCTGAATTTATCACCAATCTTCCAATCTTTCTGTTAAGCCTTCAATGGTGGCAATTTGGAATGTTTCTCACTTTGAACAAAACGGTTTGGCAT  
CCTTTTCAATATGATCTTTGTTTGAATCATCTTAGTGTACCAATGGTTTCAATTAATACTTTTGGAAAATCTAAATCTTCCAGTCTCACAAATTTGAGT  
GACACCAATATTTGGTACTCTCTTCTGGATGATTTAATCTGTAAGGAAGCTTGTCCACCATCTACGATTTGAAATCCATTTCTCAGCCACATATAA  
TTGCAAGTAGGCTTCTTCCCTTGAACCTCACATGCACCCATGTATACCAATACGTTAATAGGAGTCTTACCATATCTGTGGCTCACCTTAGTGTCT  
TTAAGTCTTCTTCTTGGCATTGATTTCTTCCAAAATGTTCTTCAAAATGTTCTATGTTCTACCTGTTGATGTTGATGTTGATGTTGATGTTGATGTTG  
ATTTATCATCATTTGATACCCACACCTACACCTCCTTCCAGATGGCGTCAATGTTAAATCTGTACATGTTCTTGTCTCATTAATAACAGACATCATACTCT  
CTGCACCAGGAATTCCTACAACCTGTTTTATGTTGACATACCATATTTTATACCTTGATTTTTCATCTCTTTGCAATTCGTTTACATGGAACCTGTTACACCT  
CTTCTCTGTTGTTGGCACAACCTTTCCAAAATGGCCTACATAATACATCTATAACATCTGCAGAAATATGCCGGGCTCCTTTTCAATGTTGTTGATG  
CTATATCTGCCACATTAATAACATTTCTGTGGTTATTTGTTGATTTCTCTCTCTTATACCTGCAATTAATAATTTTCTGACATTTCTCCTCAACCAAT  
GCAATCCAATTTCTCTTCTTTATCTGAAACATTTATCATGAATGTTCTGAAACGACCTCACTTCAACCTCCATGTTTATCTTGTACTTCCCTCATAACA  
TTTGTCACTCATCTCCATGGACCTAGCTTATTTGCATAGCTTGTTCACAGCTCAGGTCCTTTGCTGGCACAAGCGCTGTTGATTTCTAGAGTCTGCAACTT  
GTAATACTAGTTGGTCTTAAGATACGCTTCTGCTGCTACTGTAATCTGCATGTCAATAACAACTCAATACAGCCATACAGGATACAGTTCCTCC  
CTTGTCTGCTTCTTGAAGAAAATAGTATCTTTCCAGTACTATAATTTGTTTATTTTCAAAAATGCTTGGTCAATTTTCAATGCACTCAACTCATATTTCT  
CTGTTGATCCTGAACAGAACCTTCTTCCAGACCTTCTTACATTTGTGTGATCCGTCAGGCTTGAATATTTCTTAGTGTCTCAGCACCACACAAT  
TTGTAGTGTGCTTCTTCAAGTCACTTGAACCTTGGCCCAACATAAGTAGACTTGAAACTTCCAACCACTGTTCCACATACATACCTGGATTTTCCGG  
TTGTGAAGAACTGCCTGGTGCAGCAATGTTCTGCATTTTGTGTTTCCACTGAGTCTACTATTTGTTCTAGATATTTGTTTGCCTGCTGTATACATATA  
TATATTTTTTTTTAAGTTTCACTACTCACAGTTAAATACTCTGTAATTTTCTGATATTTTCTTTTGGCTTCCGCTCCTTCTACTTGTATTTATTTCTGT  
CCGACGAGTGAACACATATCGTGTCTGTTGCATAACACTACGTTTATGCTTGCATAGATACGATTTGTAAGGTTGCCGTGGTAAACATTAATTTCC  
AAAATGGCAGCCGACGTTTTTTCAGTTATGGAGGTCCTTCTGTTTATCAGATCTACGCTGCTCGCGCACCGCTTGAAGATGACGATCCGCGAACCG  
TAAATGGCAGTTGATTTCCCAAAATATGTTCAAATGGCAAGGCAAGCTGCTGTTTATCCGCTCTCTTTTCTGCTGCGCGCTTCAATCTCAGCTGCGGT  
CACTTATTCGATACCTGGTATCTCTTATAGTTTCTGTGATTTGAACAGGAACACGCAACCTCATTTCTCCTCCGCAAGGACCTCCTTCCAGTAGTT  
TTGCTTATCCTCGTTACATGTTACATTTAACAGAGATGTTGATGCGATTTAGAAATAAATGCTGTTTATTCAGTAAAGTATACCTGAGGTTCTCGTT  
GGAAGTGAACCTCTCTCTGCTTCTTTTCTTATACGATTTCTGAAATGTTCAATGTTCCAGAAATCGATACATATAAGCATTCAGCAGAGACACAGAA  
TGCTATACATATAAATCTTAGACATGATGAAAATACAGTCTCTCTCTGCAACAGAGTGAACCTGTAGACTTAACTGTAGACTTAACTGAGTGGTGAACAT  
ACAAGGTAGCCAGTGCATGGAGACTTGAATAAAAGTAAATGATGAGGGTAGGGGACGTAACCTTGCTTCAACAGGTTCAATAAAGGAAAG  
AAAAGAGTGAACCTTTAAGTAGATGGGTTGATTTCTACAGCTTTCCAGGTCACCTAAAGTGAACATTTAACTCAAGAAAGGAAAGAAAATAGTGTCT  
CCTAAATTTATGGTCCCTCGGATTTCTCCACAGGACGTAACAATGCAATGAGGAGGAGGAGGAGGAGGAGTCAAGCCACAATTTTGAAGTAAAGTAA  
TTAAACAATGGAGTGAAGTGAAGTGAAGTGAAGTGAAGTGAAGTGAAGTGAAGTGAAGTGAAGTGAAGTGAAGTGAAGTGAAGTGAAGTGAAGTGAAGT  
ATGATAATCCGGTGTATACACGGGTGCTATAGGGTCTCCATCGCTTCTCTCGGTTGTGCGTGAAGTCTAGATAGTGGCTCCTGTTAGAGGAAACGTTTCA  
TGTTGTGAATGGGATGCAAGCAAGTAGTTGAAGTGGTCTGCTACAGCAGGCGCCCTGCCATTTGTTGTTGGTGGCTAGCTAAGCAATTTGAGTGGTACT  
ATACAGCAACTTCTGCGGTAATAATGTACGATTTGACACGGCCGATTTATTTGCAAAATGATGTTATTTGGGAAATATGTTCCGTTGGAGCAGTTAT  
AATCTACTACTTGGGCTGATTAAGAAACGTTTTTCAATGGTGTCTTCCAGGCTTAAAGTGTGTTTCAACAAATGTTCTACACTTTCTTTTGGAAACAAAA  
GAAGAAAACATTTCAATAAAGTGTCTTGGTGTCTCCATCAAGCCCTCGTCCGCTTACCATCAGTGGAAAGTTAGATATTTTGTACTAGAAAGGCA

CCACGGGTACGAACTTTCCAGTAAATGGGTAGGGTGGTGAATGGGTTCAGCTCTTTCCGGGATTGTGATAGGGAACAAGACATAGGGGGACAAG  
GGGCATTACGGGCAACTCGTCCCGGCTCCAGTCAGTCCGCAATACTAAATTCAGCATGCTCAGTTGGGGTCCGGGGAGGAGAGGGGGACATGACTG  
TCGAATGTTCCAAATAGTTGGGACAGACCCTGTATCCACGCTGTAAAGCTGTGGCGAGCCACAGAGACGGCTTACCCAGCTGTCCACAGGGTCACTCAC  
TGACACGGCGGGGAAGGAGGGGCTGTTCACAGAGATTCAGACTGTGCTAAGGGCTAGTGGAGCTTGTGTGATTGGTTCTCAGTCCCAGTTCGCCTCCT  
TCCTCCTCTGAAAGAAATAGAAGTCTGCACCAATCACAGCAGCTCACAAACCCAGAGCCCTCCCTCCTTCCCAGAGTTGGTCACTTTAAACAAGTTGC  
AAAGCTTTCAGTGCATTTATTCGTCTCCCCCGCGCGCCAGGACTACCAGAGAGCTCTGCAGCGAAGGGACCGTGGCCCTTTGGGATTGCCTGCCA  
ACATCTGCCAACCTCCTCCAAAGAACTCTGCACGTCCGGGGCTCGGCTTCTCTCCAGCGTCTGCCAGGGGACTTCCATCTGGTCCGGGGACTCTCTTTTG  
CCTTTCTTTACGGTCTCAGCTTGGGGCTTCGCCCCAGAAGATTCTTCTTGGATCTCCCCGGGCAATGGCTTGTCTCCCCGGAGCTGTCCCAGAAATGA  
TGGCGCCAGGACCAGGGCAGAATACCCACGGACCGGGTTCCTACTAGAAGTAGGCTGTCTGACCCCTCGGCTCTAGCACACCCTCTGAGCCTCCCAACCAA  
AGGAGAGCTCAATGATAACTTCATGCCCATGTACCTCCAACAGCATCCCATGTAAGTGCACGTGTGGTGGACCCCCGCTTCTTTATAGCAAAAAGTCTGC  
GGCGGTTGAGCGTTTCAGCTCCAGACGCCCTCTAACGCACGTAAAGTAAATGCATGAAATGTCGCTTAAAGCAAACTTTGGTTTAAAGACATGTG  
TGTTCTTATTTGCGTAGTAGTTCTAATGCGTACAGACAGAGGCTCGATCGTACCTACAGGGTCCGGGCTAGAACCCCCAGCCTTCGTCCCTGGTGTTC  
TGCATCTTCAGTAAATGGCTTCTGTTGAGCAGAGCCTCTATGTTCTCGTGGTCCGAGGAAATGATGGCATAACCCACACAACTCCCATCTGCCCGAC  
TCCATTTGGAAGTACTGCTTCTTTCGACTTTTGTCTGCTCCTTATAGCCACCCGACTTCTGCTTAAAGCCCGGATTAATTTAAAGCCGAGCGCG  
GCACACCAACTCTTACATTTAAATGCCCTATGGTGTCTGCCGACTTCCACGAACACCGTTGTATGATGTAACTTTACTGCTATGTTTGCAGAAAGG  
TCTGTGAATCTAGCATCATGTGTGCCCTCACAAATGAATGAAGTGGAGCAGTATACCCCTTCCCTAAACCTGTGCACTCTCCATGTCTCCATCTCTCTTT  
TATTAAGGATGCTTTTACGCTCGTGGTCCGCTCTCCATCTCTGCTAGGACCAACCAATGATCAGCGGCCATCCCCCCCCACCGCCACAGCAC  
TCGTCGGGCTCGTGCCTATTTCCAAAAGGGGCTACTTTGTCTACATCTACACAAGTCCATAGAGAAATGCCATGCTGTGTAATTTGGGGTGTTTGGCT  
GGGGGGGTAGATCCACTTTGAATGTTTGCCTTTTCTTTGGGGTACAGCCGCTGGATTCTGGACGAGAGAAGCCACCTATGTCCGGTTTACAGGCTT  
GCCAAATGTCAGTACCCTTACACTGGTTTTCAGGGGTGGCCCTTCCGCTGTGACTGGTTCCTGCCACAGTACGGGGGCTAGGGGCTTCTTGT  
ACGCTGGGTGCTTGGTCTGTTTAAAGGGAGTTGTCACCTCTGAAGTCTTCCCTCCGCTTCTTCTGGTTGTAATAACCGCAACAAGAAATGCCCGGTGAAG  
TCCCCCGCTCAACTTTTTCACAGTGTGTTAAGTCTTACTTCCAGGGTTCGTAATAACACAGTCTGTTGGGAAGTATCATTCTTTGGGG  
TCCCGTGTATCTTTTCAGAGGACAGTGCAGTCTGACAAAATAGGCTCCAAATCTAAAATATCTCCGAAAGATCCGAAAATAAGTTTTCTCTGTTCGT  
TTGAAACGGATGGGCGTAGGCGCTTGTGTCTGTCAGAACACAAAACGAATGGCACACCTTTCAATGATAACGGGTCTCTGTTGGGAGGAAATGTCAA  
AATACACTACTTCTCGGTCAAACAATGTGGGCTCTGACCATCAGCATACGACAGCAGACTTTTGGGAAATACAAACACCGGGTAAAGGCTTCATTTGG  
CCTCGAACAGGGCAGTACACTAGACATTTGGGAGGTAAGAAAGAACAGAAATACTTTACTTTAGACAATCAATAATTTGGAAACGGAAGCAGATTCGA  
CCAAAACATTTGCAAGAAAAAAGTTTGCAAACATACAGGGAAGTAAAGAAAATACCGCATGGATTTTAAATGCAACAAGCCGCTTCGTAGAGGCT  
GAATCCGTTGGCTTCTGTCCGGAACAAGGTTCTCTGGAACAGAACCCTCTCTGTAGATGGGGCATATCGTTAAAGTGTGCCACCCCAATAAAGCATGC  
AAGTACCACAGTGTGAATTTGGCCACACTGAAGGCTCAGTAAAGACTTTCGCCCCCTGGATCTGCATCATAGGCCAGCTGGGGATGTGGGTA  
CACTCCGGGTGTTAAAGCGCCGCTTAAGCAACCCATTAATACCTTCCGAACCTGCACCCCTCGGCAAGTCTCCATCGCCCATGCCAGTATGTGCCAAT  
TAAGTAAAGTTAGTCTCTGTGTCCAGACCAGCCAGGAAGAGTGTGTGCCATGCAGAATCGTGGGTCTCCCTGTGGACGTAGAGCCGGCTATGCCT  
AGCTATCATTCAGGATAATAGTGGGATATGTCTGTACGCGCTACATCTGCCCGCTCTTCCACGCATCCCTCCGAACACTTTGCGGATCCCTTGGCC  
TGCAGCCGACAGCACATGCTTCTGTGGCAGCAGTTTGTGCTATTAAGTGAAGATTTCTATGATTTCTGTCGCAAGTGTGTCAGGAGCCGGAGGC  
AGAAAACCCACAATCCGGAGGATTTGCTCAAGTGGCTCCCGCAGCAAGTGACAGAGACAGACATGTTTGGACAGATGACTGGCAATAATAGCACCTTG  
CGGGCTGGGGCTCCACAGCCACTCCAGCCGCTGCGTGGAGGACCCATAAATGGCCCTGCAAGCTCCCGCTGTGCTGGCCTCTCATGGCGTTCCTCC  
GATTCCCCGGTGCATTATACAAAGCTTCGCCCCCTTAACTCCCCACAGCTCAGGATGCAAAATAGCGCTTCACTGTGCCCAAAACACCCGCTCTCT  
ACAACCCACAATAAAGTACCCGACACCACTAAGCCCTTACTCTTGGCATGTGGGTTATCATATAACCACTGGGTATGTCACAGTATCACAGAG  
CGTTTTCCAATGGGGCTTTGCCATTTATAAACCGGTTTTCGACGGAAGCCCATATTTCTGCGCAGAGAAGTGGCCGATCTATGTAGAGATCTGGCTATT  
TTACGGAAGAAGCTTTCAAGGGCACTGTGCTGCAGAGTCTCTTCAATTTCTACTAGCCAGACCTTTCTGAGGCCAGCAGGCCGGGCGGGTACTT  
TAAGCGGATTTGATTTAACACGGTGAACAACTCAGAACTCAGAAAGGAGCAGGCGTCAAGATGCCCTACACTGGATCACCCTGCACCAGCTTAAACCGGTA  
GCCTCGGGCAGTGAACACCCCAAGGGCTATCCGACAGATAAAGGACCAAGAAATTTGCTTTAGAACCGGAAGGTTATAAACCCACCCCTGAAGTTAAT  
TGCCCGTGTCCACCACCCCGTGGTGTAGCGCACAATAACTCGTGTCTATTTGGGATGGCATTTGCAAGTAAAGCCCGAGGGCTACCACATTTTAAAG  
CAGTGTCTGTACTACATCTATTTTACAATGAATGGTCAACGAGATTTAATCAACAGTTCATATGTCTTGTCCGTTTAAAGCCTGTGGCATTCAGTGA  
GCCAAAGAGAAGTCTCCCGTTAATACATATGTGTACAGCCACATCACACTTCCATTTGTTATGGCTGTTCGGGGCTCTTTGAACTTTTCCGATAA  
TTTCTCCCTCTCTCCCTTACAGCTTAGTTACAGTGGCGGTGCCATCAGGAGAGGCTTAAGGACCAACACACTTATAAGTACACAGGATTTTCAATAA  
ACGCAACAGGGCAATGACGGCATTTCAATGCAACCCCTCTTACAGAATAAAGCTGCACCTTAAATAATACAACTGATACCAAAACAATACTCGGCTAT  
TTCACAGCTGAAAGGCATCCAATGTAATGAAAATAAAGCTGAAATGGTCAATGCTGCGGTTTATTTCCACACATGGACAAGGTAAGTGGCCCTCATGACC  
ACTGATGTGATGGGCACAAAATCAATATTTAAAATAGGATGGAAGAGAGACTTTTTGGCAATGGCGCGCTAGCAAAACAAATCAAAACAAAC  
AATTTAGGACAGTGAAGTGAAGGACAGATAAAGAGAAAGCAGGGGATTTTGGTACCGCAATAATAGTGAATATTAAGTATTTTCACTTCCACTAATAA  
AACACGACGAAGCGGACAAAGAAAAAACTATTTTCAATAGCGCTAATTTAACGTAATGGTTTCTTGTATGTTAATAACAGTTTTTACCATTTTATGTTGG  
CATTTATTTTCGAAATGTAATCCGAGTTCTAAATCATGTAAAGAAAAGTAAAGTAACTGACAGATTTAAAGGCGAAAACAATATTTGATGTTTCTGTGTA  
TTGTTGATAGCTCTTCTGCTTACACAACCTACGCCAGGAGGATTTGGGCTTCTGGTATGTTTACGGAAGGCCGTAAGAGCTCACTGTTTATCTTGC  
CCTTCTTTGTGATTTGATGTCTTCAATTCGCCCTTTCGCTTTTGAAGAAAGAAATTCGCAAGTGAAAAATTAAGGTTTGGAGCTAACGTGGGTTCCGCTT  
TTCCATTTTATGATTCAGGTGTCCTCTTGGGCCAGGGCAGAGTCAACCAACTGGGGGGAGTGTTCATTAACGGGCGCCCAATGCCCAACACAT  
CCGCCACAGATCTGGAGATGGCACACCACGGCATTCCGGCCCTGCGTGAATTTACCGGCAGCTACGTTGTCTCCACGGCTGCTGTCCAAGATCCTGTGCC  
GGTACCAGGAGACGGGTTCCATCCGGCCCGGAGCCATCCGGAGGCAAGCCAGGGTGTAGTGTACAGAGCGTGGGGGGGGGGGGGGGGGGGGGAGGA  
GGCTCAAGATCATGGGCTGAGTACAGTGTGTCATCAGGTACCCATCCAAGGGCAGATACAAAGGTGTTATCAGATGAACACCCCATAGGTAGAGCACACA  
GTTAGCGCATCAGATACAGATCATATAGGCACCTTTGGGGTATCAGGCATACCCCTCATTTGGGCGAGGACACATTTGGGTGTCTATAAAACATATCTCATG  
CGAGGTAAGTGTGGGTGTATCATCATGACACCCCATGGGAACCATAGCGTGTACTACTCACACCCCTTTGGGTAATACCCAGAAACACACAGTGGGTG  
TCACTAGATAAATATCTACTAGTACTGGGTGTATCATATATAGTTTACACTTCACTAACCAATGCCAACCCAGGAGGGGCTTTAGGCTGTATGGGTCA  
ACAGTAGTTGGCAATGCTCAGAGACAACAGGCTGGGTACTGTTTTAGTGCATTTCTCAGAGAATGGCGGAATCCTGGTTGAGAGGGTATGGATTATATCCT  
AGTGGGGGATTCAGTAAAAACAGGTGCCGCTTTTAGGTGGGCTCTGAATAGAGCTGGCTGTGGATGACAGGCTCTAGAACTCACTTCCCTCTCTGATGC  
AGTGAAGCTCCAGGCTGAAACTGGTGTCTCCAGTAATAACTAACACTGAGGTTTAGGTAGTGTAGCAGTGGGCGTAGATGATGATGATGATGATGATG  
CCAACTGACAAAGGAACCTGGTTGATGCTTATGCTTAAAGTCCAGGATGAGCAGAAATTCGAGTTTATGTTGTGACAGGAGGCTCCATTTATGCTGGC  
ACGAAAGACCTGGTGAATTTTGGACACAGATGCCCTGGTGGTGGGACACTGCTCTCTAGATGTGCGATGCCAAGGCCAGGTGATGTGACACAAA  
GAACCCCTGATGTGACATAGCAGCTCTATGTGACGCGAGCCAGGAGTCCAATTAATGATGGCAACAGTTAAAAACGGAAACAACACTCTGTAATATGC  
TTGAGTCTCTATACTCAAGCATAAAGTGAATTTCCAACAATAAGCCATTTGCTAAAAAGCAACTAAACATAGCTAGCTACTGTGTTTGAACCAAGT  
AACAAATCAAGAAAGTACGGAAAGGTGTAAGAAAGTAACTCAGGACTTAGACAAAGACAGATGGAGACTAAATGAGCAGGAGGATTTGCTGGCGG  
GTAGGGAATGTGCACAGTGCATAGTCTGGGTGCCCTTCTCTGCCATCAATACACACCTGTGTGCTGCCAGTCTATCACTCTTGGAAATACAGAGACAAGTA  
CAACAATAATTTGACTTTTGTAGGAAGAGGCTTCTTGGGTGGCAGACTTTCAATAAAGCTTCCACTCTGATACATAATTTCCATCCATGTTAATGATAC  
AAGCACAATCCGCTGACTTACAGAAAGTGTGACAGCAAACTACAAAGAGATGGAGTAAAGTAACTAATGATGAGACTTTAATGATGAGACTTCAAGCTCCACTAA  
GGACACGCTATTTTCTACTCTGCTGCACTGGCCCGTGCAGATTTCTGTAGTGTGATATAAGCAGATGCAGAGATGGCAGAAAGCCAGCCACCTTATGAGAT  
TCAACTCTGATAAATGAAACATCTCACCTACGCCATAACATTTGTAACAATAGGTACAAGAGAGCACCCGATGGCTAGCTGTATTACAAGAGCTCTAGGG

ATCTGGTTAGGATACTTAACCACAGATATGAGAGCCAAAGTGATCCAGCAGCAAAGGCCTTTAGGTAATACACAAACCTTTTAAAGAGCAGTTCTAGTT  
AAACGGAGGCGTGTGGTTGGTTCCCTAAGAGTGCTGTTCAATTTCTGGTCACCACAGTTTGAAGGATTGGCAAACCTTGAAAAAGAACAGAGAGGGTAGAA  
ACAACATAAATAAGGTGATGGCAGGTTTAAACACAAAACCTCAAATAATTAGTAAGGTCATCAAAGGAGGCAGCAGCCTTTGCTGGCGGAAAGGACACGATA  
GCCCATGTAAAACATTTTAAAAAGTCAGATGTAGTGACAAAAGGTGGAACGATTTCTATAAGGCAGCAGATACTAATAACAACTTGAGTATGTGAAATA  
GTACAAAAGGTAATATTAATAAGAAACATGTTTATTTGTCCAAACAGTTCCGTTCTGGATAGACTGCGATATTTGGCAGGTGGAGGGGCATCACTAC  
AGGGTTTCATTTGAAAAGGTTCCACACTGGAGCAGGTTTCGGACTCAATGGTGCAGGGTACCACATACATAAGAAATACGATAAGGGCTACAAGCACAG  
TACAGGGCTTGGCATGATATGATAGGGTCAAAGCATGAATGGTGTGGACTCCATTAACCTGACCAATGACCCAGTGGGTCCCTAGTACTTTTATTTTCAGTT  
TTGACCTTGAACACATCATGGGGTGTGACATGGTAATCCATTTGGGTTCTAGTACAGTAGTATTTGGTGTGCTACTGCACCACAGAAGGGAGCTGGCACA  
GTGATTTTATGGGGCGCAGTCTGTTGGGAAGTAAATGCTTATATAGTTATCATCATATAAATTAGTGTCCATATGTCATGCTGCAAGTGGCGTGAGG  
ACAGATCGGGGTGAACATGCAACCAAGGCTACTCTCTCCCATCTGTGATTTTCAGAGCACCACCTTCTCAATCTACCAGTCTTTCCATTTCTCTACTCA  
ATTTCTACTTCTCTCTCAGTTCTTACATTTTCAATTCATCAATTCATCAATTTCTCAATTTGTCATCTCCCGTCATCTCCCTCATGATACCA  
TAGGCTCGACCTTCTCATGCTCTCTCTCTCCCATTTGCTCACTTTTTCATCTCCACATATTTTTTCTCTGCTTTAAGACTGTCCCTCTCAGTCCCGATTT  
CTTACTCATCCCCATTTTCTTACACTCTTTACTCGATACCCGCTCTGGCTTTACTTTCAGTCACTTCCACTCCACTTGAATCTTCAATTTCTTCACTC  
ACTCACTTCTCAATCTTGAATGAGCCAGCTTCAATTTTTTTCATGCTCTCTCTCCGCTTCCACTTCCGAAAGCCCTTCACTACTCTTCTGCTTTAC  
TCATCTACTTTCTACGCTCTGACTCAACACTTATCTCTCTCTACTTCCAACTCCAAATGTATCTATATCACTTCACTCCCATTTCTACTCTCCCA  
CACTCCCATTTCTCATCTCCCTCCCGTCTCTCTCTCTCACTCTCTCTCCATCAATGTCTTTCTCAGTCTTCTGTATAGCTACTCATTCGTCAGGTC  
AAGTAGTTCTAAATTAAGTGTCTTCTCTTTGTCCTTTGACCCCTGAAAGCAGGTGGCCACTCTCTGAGTGGAGAAGAAGATTGAGGAATAAAGAGAG  
AGAACCCTGGGATGTTTCAGCTGGGAGATCAGGGACAGGCTCTTAAAGGATGGACACTGCGCAGGAGGCAGGTTGCCCTCAGGTGAGCCTCCACGCTGGG  
TGGGGCCACTGCACAAGTAACAGAGCACACTAAATGGGGATGGCGTGTACATAGATATAAAGTGTGTTGCACACTACACTGACGAAAGGGCATAGTGCA  
CACAGAACCCTTTCATATCATCTAAGAGTGCACATAGAGCATCCCAATTTGAATGTGGGACACACAATATAAATGCCATCCCTGGGAATTTGGCCATTTCT  
CGTACTACTTTTGGGACTAGGAGAAAAAAGTAGGCATATGTAACCCATCTATAGTATTTTACAAAGGAAGAAAACATGCAGGAAATACAGCCATATAT  
TACATACAGGACTAGTGTGTAAGAACACACATGGGAATATTGCAATAAGTATGCTGTGTTACACCTGCAACCGTGAACCTAACACAAACAACTGCA  
ATAATATCTGCCAAATCCCTTTACATTTACTTCCAACTAGGAAGGAGTGTCTCCCCACTACCTATTTGCCATACAAATCTGTCCACTTTAAAGAAA  
AGTCTCAACCACCTCAACATTTGGCGGCCCCACAAAACCTTTTATTTCCATCTCCAGTTGCACAAATGAAACAAGTGGGTGATTTCTGAAATACAGGACA  
GGTAACATGAATGAGGATCTAATCAACTATCAACGGTTAGTATGTACCAATTCGAATTTCTCTTTAATGAGAATGGACTATAATTTGCCCTTTTACT  
CGTTTTCTTTTTCTCGAGTGTATGTTTTTCCCTCTTTTTAAAGCAGGAGGATTTCCGTTCCACCCCTAACCCCTCCCATCTTCCATCAACTTTGAC  
CCCTTCTCTACCCGTTTTCGACTCATTTAAATATAATTTCAATTTTCCAACTTCTGTACGCAATGGTAGATTCAAATGGATGGATTCTCAAAGAAAAC  
CAACTGATGACTGAACACACCACAGAAATGACTGCACACAGCCAGATTTGATCTCCAGGTTGCAAGTTAGCCTGCCCTCAGAGATTTAAAAATTAAGGGTT  
CTTACGGAGCTTGAATGCGCAGACTGAGAAGTCTATCAAAGTACTTGCAAGTCTACACGAACTGGTGGGCAAGGACTATCACTGCCTCATACCCCT  
TCAAAGAAATGTGCAAAATCAAATGGACGACTTCCATTTTCATAAAACTCCGTCATGCATGCAATAACTCCATACAGCCCTTTTCCATCAACTTCGCGTGC  
ACAACCACATCCAGCTTCCCTACAAGTCAAGTCAAGTCTCAGAGTTTACCCACGTCACCAAGTGGCCATCAGAAACATCTTGGCTTCTATTTCTAATGCAAC  
CAAAGCCATTAATAGGGCAACTCTGAAATAACAAATATAAGATTTGTACACTCTGATAAGTAAAGGTTTATAGGATACCTTTCTTGCATTACTAAAGCTT  
TAGAAACATTTGGTAACATCTCAATTTGTTTCAGTACATGGAGGAAATAGTCTTAAAGATTTTCCGTTAGGATTTACCCCTGTTAAATGAACAATACGG  
TCAACGTTTGTGAAGAACTACTACTTGTATACCTGAAACACTTGTGTACGAGCAGATATAAAATAAAATATCATTTTCAATTTACTCAATGGTGGCCAAACAGG  
CAAAGTATGTGTGTTAATTTCTACTCAACCTCTCAACAGTGTCCACACTAATGAGCAGAAACATGCTTATCACTTACCATCCACCACCAAGCCAAACCA  
CGGCCCTTTTGTGTTTGAATACCAACATCTTATGTGGATTAACACACGGATCGCATCCAAAGCAGGCTCCAGAAAAGATTTTGAAGTCGGAGGATT  
AGTTGGTACGAAAAGATTTGTTATAAGGAGTAAAAAAGTTGATTTCTTAAAGGGCTCCGGTATTTAGACATGTAAAATATATTTTATCTCTGGAAGA  
GATATATGTTTGAATCCATCTTCTTTGATGTCATGCACATGAAAAGATACTATTTTACCTTAAAGTTCTCTTAAATATAGGCATTAAGGTATTAGAG  
TTCTTTCTGTAGCACTGTTCTGTGGTACTACTGATTAATAAATATCCAGGAGCTGTGTGGTGGTTGCAGGGGGTCTTCTATGTTTCTATGTTTCTCC  
TGTGGTGGCTTTTACTCACTCTTTTTTATTGAGCAGATTTGCTGTTTGTAGGGAGCAGTGTGGCCGAGTTTCTTATCAGTAAGACTGCTCCAGCT  
GATAATTTTTCAGATTTTACATGCTCCGACTAGCCCAACATCTTACTGACCCACATATACATGTTGGTCTACTTATGACAGGTCACCACTAAACTAGT  
TGAGATATATTGGGGTACACAGAGGTCGGGGGAGGGGCTGAGGGGAGCAGCTACTAGTGGAACTACCTGAAAAGTGAACCTGGGATGGAAGCAAACT  
GGGCTCTTCAATGATACAGAGATTGCTCCCTCGTACAATTTCTTACTTGTGAGGCTTAAATAATGCACCTACCCTATCCACTGGAGAGTGTATCAT  
GGCATGTGGCACAATTAGAAATGGTGTGCTCTGTGCATGTGGAGAATGAGGGGGCAAGTGAATTTTATGCCCAGTACTAGTGTGAACTTAAACTATA  
CCCTGCTTTGTTTAAATCTGATTTTAAATCTTCTTCTATTTGCTATTTGCTATGTTGATACAGGGCAGTATGAAAAGGTCATGAAAACCCCAAG  
GGTACAGCCAGGATGTTTCTGTAACCTCATTCATATTTGATTTGCTCATCAACCACATTAATCCAGGGCTGAAGCACTTCCACACACAACCGATAAATGAAC  
CATCACTTCTTGGACTACATATTTGGTTAAACATTTCCACTATAGCTGCACACAGGATAGGTTTCTCAAACCTTTTCAACATTTGCCAACCGCATACATGT  
TGCAGGCTTTCTACACAAAGCAACCCGAATTCACCTTACCAGACAAAAACTTTGGGGATAAAGCTTTTCCATTTAAAGTGTGCTCGCTCTGCATTTGGC  
TTCTCCACAGCCCAAGACCGGAGCTGCTCAAGCTCTGAGAGCAAGATGCCACATTTTCTTCTCTGCTTAAAGCAAGGATTTCTGTTGCCCTT  
TGAAGCAGTATCTTGCACACACTTCTCACTGATAACGAGGCCAAACATCAGCCTCATGGTTTGTAGTACAAAGTGGCCATTAAGGCTTTACCATTTGTTTCAGC  
AGGCACACAACACAAATAGGTGTGGTCCCTTCCAAACCAACAAATGGCTCGTCTAGTCTCATGACTGCTCAACAGCTTAACTTGTGCTCGATTCTCTG  
CTTACAGCATTACAGCAGTGGTGTGATTTAGTTACAAGTCTGTTATTTGTACCATTTATTTGGATATTTCAATATATATCCACACTTATAGCCTCCGA  
GTAACATGAAGCAAGTACGAGCAAACTCCATAAAATGTACACGAAATGACATAAAGGTFACATCCTACAGAATAATACACAGGTTGGGTGCATACAAATFACA  
GCTCGGTATAACATATTGGGCAACCCACATTTTGAAGACATGCAAAATACAGTACTGCACAGAACTCAATACAGCGGGTGCACACTCACACCTTATTC  
ACACTACGGTTTTTATTGGAAGAGTGCACACACCCCTTTAAATAATAGCAACAGTATCATTTAGAATTTACTCTACAGGGACAGCACACAACATACTAA  
ACAAAATACTGGATTACAACAGATGTGTACTATAAAGATGTAGGAACAACCGCACAAACACAGCATGTAAGAGGCAACACACACCATGCAACACCATGGA  
ACTTGATGCGCACATTGAATAACATGCATACCTGTTAATGTTAAAGGATTTTGTACCGGCACATTCACCACCGGAGTGGTCCAGGCGAAAAATAAAT  
TTACTGGAGAACACATTTTATGAAATTTTTCAGAGAGCTACACAAATTACAGTGCACATATAGAGACCACAGATGTGAATACCAAAGAGCATTTGGTAAAC  
AGCACACATGCCAAAATGTGTGCAGCAAGGAGTAACGTAGTAAACACAACCTCAAGGATTAAGAGAACTTAAAAAAGCGGTTAAATACATACATG  
GAGAGGTCAAACATGCACAAAACAAGACGTAAGACACATTAGAGGGGGCAGAAGTCTCTAGCACTACTTACTTCAAAAAGTGGTCTCACTATGACCC  
GTTTTCAGTATAGAAAAATAAAGTAAGGAACACTGTCTAGTCAAGAACATGGAGCAAGCATATACAGAAAGCATCCGAATGTGCATTCATGTACAAAAACA  
GCTGGAAGAAAGTGAACATATAATTTGTGTTATAAGTAAACTAAGTGGGTATTTTACAAGCCACTATAGATACAGAAAAGCTATGAAGTCCAGAGAAATG  
AGATGGGTAGCTGTGTGGCAGATTTCTTGGATATGCATCCAATAGGCTTGTGAGGTTTATATCAGTTTAAAGGCTGCCCTACCCTCAGAAGACAGGAGG  
GAACCCGAGCTCCAGCTGTCAGGTTCTTACACTACCTCTCTGGCCCTTTAGTGCAGTGTGATGGTGCATGGGCTTCCGCTCAACTCTTTAAGACAGCCA  
AGCTGGTGTGCTGCATCTTCTCCAGGTGTGGCCTGCATCTGCTCCCTCTCCCTTACAGAATGTATAGCCTTGTGGGCCAAATTTGTAACAGTATAGTAG  
CCCTCTGACTGGTTTGGGGGTTATTTTCACTCTGCTGATCCAGGACTGTACAGAAACATCCCGGGCAGCGCATCTCTTCCACCGTAGCGTCAAGCCAAAG  
TTTTGAGCTGAAAACCTGGAAGTAGCGGTCCTTTGCCAGCTCTGTTCCCAAAAAATACTATATTTTGTGCTATAAGTCTTGCAGTCCCCAGAGAACT  
GTGGGTTGGATTCGATGCATGCAAAACTAAATTTGAGTCTGATTCGTTTCTTGTGTTTAAATGCAATTAACATGCACTAGACATTTCTTAAATA  
CGGTAATTTACTTCTGTGCTACTCTCATGAGTACTAAGTTTGGTGATAAACCATTGTATTTAACAGTGGGGCTCCATTTTGAATGGCAGGAATCAAA  
CCAGTGTCTTATGGGGTGGGAATGGGCGCAGAAAGCCAGCTTGGGTTCAATTTCAACTCATTTGCTCCAGTATTTGGTCAATTTGGAATCAACAAATCTGA  
CCTCAGGATGAAACAAGACAGCCAAACAGTGTGGAGAGCGGTGGAAAGCAGGTTGAGATTTATGCTTCTATTAAGAACTCAATCACTCAATGTTAACTGA  
GACCTGTGAGAGAAGGCTTGTGTTGCCATTTTGGCCTGGAGGAACAGTGTGCTTGTGATGAGCTGTGTGGAGAAAAGGGTGTGTGGTCTGTAAAGCA  
TTGGACACCATCTAGAGACCATGTAAGGCCAGCAGTGAATAAAGAGTCTATCGGGTGGCAACTTTCTGACCGGTAGAACCCACAGAGACTAAATGCC

AAGACATGCCTGCCTGACTTTAGAGGGTGCCTGATTTAGAGGGTGCCTCGTAATTTACCCTTACCTTACTCAATCCCTAGATAGGGGGCTGGCATTGAT  
CTCTCAGCTGAAAGGGAAGACAGTGTATTCAGATGACACCTGGTCAAAGAGCAGCCGACAGAGTGTAGCCAAATTTGCCTTACAGGTTGTAAGGATAGGAGTCC  
TGCCTACTCTCAGACTGTCAAACATAGCTTACATACCGGAGGCTGGAGGTTTGCATTTGCACCAAAGAGACATATGGCCCTGGTGCAGACAGCTT  
TGTTTGTAGGGTGTAAAGTTGGTGATAAAGAGGTTGGGATAATCCATCATTGTAGTGCAGGGAAGCCCTGTCTGATTTACTCAACTATTTATTTGGCTGG  
GTCAATGAACTGGGAACTGAAGAGTGTAGCCCTGCCAGCCCGCAAAGCCCTGTGAACTGTAGAGAAGTAGACAATCTCTCATACTGTATGTGAACCTGAA  
GACTGGGCCACCTCATACTTGGAGAGCATGTGCCAACAGGGCTTACAACCTGCAAGCAGTGGTTTCCAGTACTGAACAATCTTAAACAGAGGTTAGGACTCA  
ATAAATTAACATATGTTAAAGCCATCAGTACCCTCCAGGAGGACACTAGTTACCACCTTAGGCAGTTTTATCTCCTGCCTCTTATATGGCGGAATGATG  
CTTAAAGAAAGACACAGGTAATAAACCTTTGGGCTCACTCTCTTTTCTCTCTAGAACTCAAGGAAACCTTTTGTATTGAACATGTGGCAAATTAATAAACT  
GGTATTGATTAAGCGCGTGTGTGCAGCAGTGTCTGGATGGGAGACCCTAAAAGTGAAGCAGCTTGTATGTAAACCTCCAGATATAAAAGATTGTGG  
CACATGAAAAACATTAAGTGAGAAAAGACTACTGTGTACTCTTTCACGCTATTTAATAAACAAAGAGCAGCACATGCATATTCACAATCGAACATGCCA  
ACAGCCATTCAGGTATCACACACAGTCTCTTTTGTTTTATGAAGCTAGGCTGTCTGCTGGAACCTAGGAAAATAAAACTTACAATCCAGAACGCCAA  
AGTAAATAGGATGGGATGAGCATAACTAAATATAATACCACATGGTGGCATATATGAAAATATATAGCCTTAGGCGTTACAATCTCATTTATATCTTTGA  
GATATGTATAACACAGCCATGTTTACATAGCATCCCTTGTACTGCTGTCTCATACCTAGACATGAAATCCCATTCAGCCAAAAGGACACCCAGTATG  
CAGTGTGATGAGGTGCATTTGGTCAAGGAACACCTCCAATGTAAAGACACAGCCATAGGTACGATTCGATTTAAAGGTTGCTGTTTACAAGAATCTTCTGGGA  
ACCCAAAGGCAAGAGATCCCTCAAGTGAACCTCGGCCCTCAGACAGCAGCTGTGCCCGAGCTTTGGGAGGCAATTTGGGAGGCTTTCCACGAACTCTC  
ATATTTATGGCCTAGCTGCCTCTCTAGAAGGGTTATCACAAGAAGGTGTAAAGCAGTGGTAAACAGGGTGTGTGATCTTTGGCAGACGGAACTAAATC  
CAGTAAGTGGATAGGACTGATCAATTTGCAATTTAAAAATTTGTGTGTATGCAGGAAGGGAGGAAATGCAGGACCATGCCATCACAGAGTCAATGCAAGCA  
CTAGACACGCTGCAACTAGCTGATGCACCTAAAACATGCACAGCAGTACAGGGTCTGCTTTACAGCGAGTTTTCCATGAGGGGGAGGCATTGAAAACCTC  
CATGGGAAATCTGGACCCTTAGAATACCTGGACACTAACACTAGCAGAGGAACAGTGTAGCAGCGGGATACTCCACACTCCAGATTTTAAACAGGCGACGCA  
GTCACAACTTAAATCACTAACCTTCAATGAATGCACCTCAAGCATCTTAGACAACAATTAATAACGTAATTCGCGAGTAGGCCGAAAAGTGCAGATTTGTA  
TGAATAAGTTAGCGGATGCCCTACTTTAAAAATAACGTTCTCGTGTTCATACGTTTCCACGTTGATTTCCACCGTAAATCCACACAGCATGGTGTCAA  
TACTACAGAACTAAGTGTGTTGTTTTCGAAAGGGTGGCGGTTGTATGAGCTAGGCTGTCTGCTGGAACCTAGGAAAATAAAACTTACAATCCAGAACGCCAA  
ACGACCCGAAAGTAAAGTTGACGAGAGACCCGCGAGTGGCCACAGTTGAGCAGAGGGCTCTTACAGACAGAAAACCCAGCGCACCTGAGAAGAGTTTCC  
GGTGAACCTTCTAGTCTACTTCTGAAGCCGGCTTCAGGACCGGAAAGTGGCCGGAGATAACCTAGGCTTCTGTACTGCGTTCGCGCGCGAAGACAGCAG  
TGACACAATCATGAACAGGAAGAGAGGACACTGTCTGCCAGCAACGCCATTTATTCAGCGCTACGGGAAAACCGGGTCTCTTTCTGGCAGCAGCC  
AAGGAAATTTTGAAGTCAATGATTAATCTCAAGTGTCTCAATTTTGCATTTTGGCAGGAAATGGCCAGCAATGCATTTTACAGTATGTTTAAATTCGCTGG  
CTCAGTGCCTTTTATCAGAAAATACAAATTTGGACCAGCAGTTTAGTATCCGAGGATAGAAAATGTGACAAGAGGGAGATGCTGCACACCAGAATCTTTGGC  
ACTATACGAAACAGCTTGTCTGTGGGTAATTTCTACAACCTTTTGTATTACAGTATGACCTAGTGTGCTTCTTCTCAGCTTCCACAGAACCCTGTAGCCAGT  
GTTATGTTATTCTAGTACATTTAAAGGAGAGTATAGGCGTCCCTGGATTGTGCAGGCTTCCACAATGTCAAGGTTTGTGGTTAGAGTGTCTATCTTTGGT  
GGGAAGGATACTGGCAGCGGGGACACACAGCTTTCCCCAAATTTGAGGTGAGCGACTTAGGAGAAGCTAGTGAGTCCGAGATGATCCAGGGAGCGTGGGCA  
GTTTATCTCTCGCAAAGTTTCAATAAATAGGTCAGGTTTTCGAACTAAACACCCACAAAAACAAGACATTTCTAAATGCTGACTAAGTCAAATAAAT  
TCTATAAATGCCCCTGAATTAGAAGCATACCTCTGTCTCACTGACAACCTGCATTTGGCCATTCACTTAACTGCCCCTTTGTAGAAAATAAGCTAGTGAAT  
ACCCTAATTTACATTCGCTGTACTGGCCACAAACATTAATTTACTGGCGGTGCAACACTATTTCCCTATACAAGCACCCCTGTTGTAATTTGCGACACATTT  
GTTTATCTTCGAGACAATCGCTCTGTCCAATTAAGATATGAATGGTTAAGTTAATTTGGATAGATAAAAATTAAGGATTGGAATGTGATACAGAATGAGGACT  
TCTTTTATGTGATTTCCCTTAACTTAAAAGGAAGAAATATTAATAATTTACACTGCTGACACTGGTTGCGGGCTATTCACAATGACATTTATAAAACAAA  
TTCTATTAATATGCTATTTATTTCTGTTCCGGTTTATTTCTCTGTGACACTATAATGCACAAGTGTATTTCAAGGATTTAAGGCTGCAATTTGATTTTCAGAAA  
AAAATCTCGCAAATGCTTTTCTTGGGATGGTGTCTAGTAGAGTGGTGTCTAGTAGACATACCTTATCTTTTGTGTGACAGGCGCGTCAATTTGCTGTAATACATTA  
GAATTTTACAATACTTCTATGGTCCATGTAAAATTTAAGGGACTATACTAGAGAACAATGCGACTTTAACTTATTTACGGGGTCTAGCTGTGTTCCAC  
AATTTGTGGATATTTATTTTAAATTTTAACTGATATAAAAAAATAGAATCAAACAATGTGAGTCTTAGGGCCTTACCAATATATATCCGTAGGAGAAC  
ATGATAAGACACATAGTATAATGATGGCAGAGATAGCATCGAGGGCTTTGTGACACAGAGAACAAGAACCCAGACAGCTGCCAGCTTTAAGACAATA  
GTGCCCCAGACACTGCGTGGCAGACATATGCGACACTGCCAGCCAAAGGCAATAAAGTGAAGTGTGACACTGCCCCTCATGATAGACACTGCGGAGAC  
TGCTAACACCTGTAAGTAGTACAGACACTTGGGAAGTGCAGAACACCTACGCAACTACATGTAGGGAATGAAGCATTTCTCCCTTTCCCTAAACACTGCA  
CTTGCCAAATTTACTGTAACCTAGGCATCAAGGCTTCAATGCTTTTCTTTTACAAGCCGATATGACAGACTATAAAAAGTGTGAGAAAGTGTATCCC  
ACCAGAGGACACTTAAACACTATTTGAACTGGAGCACAACAGCTGTTGAGACACCCGAGCATTTGGACTGAGAACACTCAGAGACTTACAAGG  
CCGAGACTCTGTGACCACTGACACTGATACCTCAAGCCTGAGACACTTGCAGCGCCCAAGACATTTGAGCATGAGACACTTGCAGACTGAGACAT  
TGTGAGAAGCTAAGACACTGCGAGTACCCGAAACAGCAGCGCGCAAGCCAAAGGCGAGCGCCCAACACTGACAGACTGTAACCTGCTAATACCTCAAGAGA  
ATGTAACACATGAGACATGAGAGTACCCGAGACAGCATTGAGAGACACCATGCACTGACAGCAGCTTAAACTGCTGCACCCGAAATGGCAGCAT  
CTGAGACACTGGGAACACTCGGGACACAGAAAGTACTGGAAATGCTAAGCTTGAGACTGAGGAACTAGGATACTGGGAGCCGGGTGTCACTAAGT  
GCTTAGGAGCTCAGAGACTGAGACTAGGCACTGCCACTGAAATAGAGGAGAAATGGGACACCGCACTTGGCAGCTTCTGAAAGCTCGGGGAGTGCAT  
TGAATGGATTGCAGATAAGGGATCTTGGCCCTGGGAGTTTGTAGTACACTCACAGGACTCCCGAACTCTCAGGTGGCCACGGGGCTGACAGTAAGATTT  
AGGACAAGTCCGTGTAAAAAAAGCGTTGCCAGTACAGCCACCCGCTTCCGCCCCACACTTTGCTGACAAGTAGTGTGTGAGGCTTAGGACAGGCAAC  
CCTGGTACATTTGGCACAGCTGTGGTCTGTGGTCACTACCGACTTAGCCAGGAACTCAGCAGGAGCCCTCAGCAGACTCTTCCGCGGCTGCTGAGT  
TTTTACTTGCCACACAGGTTTACACTCAGCCCACTGCAAGGGGACTCACTTATCCAAGACTAGCCAACTCGAAAACAAGGTTGGGAGGCTGGGGGT  
GGGGCTCAGGTCGCTACTGCGGACTTACTTACCCTCCGGGGGCGAAAGGTAATTTACCCTCGGACTAACCTCCGCTAGAAAACACAAGGGCATTTG  
CTAGAGCATTTCCGGGGCAGCTAGCGAGGACGTTAGTGTGAGTGCACAGGCGAGCAGCATTTATATTTGCCCATGTCTTTTGTGTTCCGAGGTTTAG  
TGAGTTTCGATTAGCCGGTCTAGAAATCAAGTTCGGGAAAGAAAGAAAGAGGAGGAGTGTGAGAAGAAAGGAGGAGGAAAGGCAAGAAACCAAGCAC  
AGCATCGACGGCATCTTGGGAGATAAAGGTAGGGAAAGGCTCGAATATTTCCAAGTATCGAAATCGGGTGGAAATGATGGACATACGGGTGGAAATAATCGAAA  
TTAGATTGGACTATGCCAAATGCAGTGTAAAAAAATCGAAATACGGATGGAATAATCGAAATGACGTTGGACTATTGGAAATCGGGGTATAATGTTAGGG  
TGGAAAGATCGAGATGTAGCTTCACTATACCAGAGAGATGGTCTGCGCTCCTTTGTTAAGAGAGACAGCCCTTCCAAACTGCAAGATAAATTAACGCAAA  
AAATGATGTTCCGTGATATGTGTATAAACCACTCATAATTAATATAAACAAATACCAACAATAATGATATACCAGAAAATAATATATGATGATGCGCTT  
TGTAAGTACATGCTTTGATTTATAAAAATACACACAAAACAGATATAACTAGTTTATAGATAAATGTAAACATCTCAAGATATATTTAACTAAATTAAC  
TATAATTTGCAAGAAATATAAAAATAAATACTACGAACGCCATTTATTTATGTTTGTGTGATACCATTTATAGATTTATGAAACACGACATTTGATTTAGCTAT  
ATATAGCAAAACATTTATTTGCAACTTTCTGTATATAAACCAACAATAATGTTTGTGTATGTTGTTTATATAAACCATTTAGCTATATAAATACGTT  
TAATTTCCAGTGTGACACTACCACTTATGTTGAAACGAAAACAATTTTATTTTGTCTTCTGTTTATTTCTGTGATCATTTTACAGTAAATTTAATAGGATA  
TATTTGATGTTGTGTTCTTGTTAATGCAGCAATTAGTGTGAGGTTGTGTTTTAGCTTTCTGTAGTTTTTGGTACCGGGTGAATGCGCAAAGACTGCCGG  
TCTTCTCTGTTGCTTTTGGGAGCGCATGGGGGCGGGAGGGGTAAAGGAGAGCGCTCACAGCAGTGGTGTGCTTATTGTGAAGTGGCGCTCCATTC  
CTTTGCTGGCATAATGTAATTTCCACCAGAAATGTGTTCACTGCTTAGCGCCGGGTGATGCCATTTGAGTGTGAGGGCCAGGCTGCTTATTGTGGCGGTG  
TGATACTTGGCGGTAACCTTGGAGGACGGGATGTTTTGCTATGCTGTGTTGGGTTGTGACATGGGCGAGCCTTTTATAGAGATAAGTGTGTTTGGTGGTA  
ATGTTGCCGTGGCAGTACGAGCAATGTTGGATGCTAATGTTAATGTGATTTTTTTGGAGTGGCAATATAGGGTGTATATACGGGGGTGCACAATGG  
GATGGCGTGGTCAATTTTGTATCATTTAGTACTAGTGTTCGGGATAAAGGTTCTCAATGCCCAGGGTGCCTAAGTGTGATGATGAGTGCAGGATGGGTG  
TGGCTACGTTGGTTAGTTCCTTTTCCAGGACATTAATAAGCCTACTTAGGAAGATAACAAACAGGGCGCAATGATGGGTGATCATATATATACCT  
TGAATATGGCAGTGGCGAAATAGGCTGTGGGTTGTTCTATGTAGACTGTATAGGCGATGTGAATAAACTATTTATGCCCAGCTTATAGCCCTT  
AGTACTCTGTAAATGTGTATAGGACTACCACAGGCTCGTGGGCGGCTGTTTACTTGTATATTTTAGCGGTATTAAGTGCATCACAAATCCCAATC

GCCAGGATGTCAGTTGTGCACCTCTGGAAATGCTGTGACCGTCCCGGAAAGCGTTCCGTGGAGCTCGCCAACGTTTGGCGTGTACCATCCGCTCFCACAGGG  
GTGTCACTTTGGGTCGCAGAGAGCTGTGTTCGAATCGAATCCCCCTTCCTGGGTGTCTGCTCCTAAGGCTAGAAAAGTCTCTCTATACGTTGAACAGTT  
TCATCATATTTGCATGGGCATAACATTTAGGCTGTCTTTGCAATGTCAGAGCAGTGTGAATTTTGGCTCGCACCCAGACTACACAGTTATTTGGCATTTGGGGAG  
GGGATTTTGGGTGTGGGCTGGCTGAGGTTTGTAAATGAATTTTGTGTTTCGGCAGATTTGTTCCCTGTTCCTAAACGGTCCCTGAACTGGGGTTGACA  
GCTAACCAGTGGCGGCTTCAATACTAATTTAGAGACTGGATGCGAGTGCCTGCAGCTAAATGCGACTCCAGCACCACACGCGTCCAGCGCAGCCATCAAC  
GGCACTGCACGGCTCACAACAACTTGACACCCTGGGCCGATTCACAAGCGTTTTTCAATGGAATTTGGCCATTGTAAAAGGCTTTTGTAAATCAAGCCC  
AGGGAGTTTCATAAGCAAATTCACAGTTAGATGCAATTTATACGAGCAGTGGACAGCATGGACAGAAATTCAGGACAGTAGCACCGCTTATCAGTACTTACAGC  
AATTTGGTCTCTGCACAGCAGCAGTGCACGCGAGCACTAGATGCGGGCAGCGGCCAGCAGGGTGGGTACACTACTGCTGCCACTACTATCAGAGCGCACT  
GGCAGGGCTCCTCAAAATGTAGACCTCTTCCGTGTTCTTGGAAAGTCAACATACTTCACTTATAATTTCTGGAAAAACGCTTTATTGACTGAGGATAT  
TACACAATGGAGGTCAAAAATGCAACTGGGATTTGAAAAGTCCCGATTTGGTCAAGATGATAGAGGAAAGGATCTCGGGGGATATTATTAATGAAAATAC  
GCATGCTTTAGCAGGATTGGGATACTCTTAAAGCTCCACGGCGCAAGCCATATTTTAAACACTGGGCGAGTCAATGCAATTTCTACTTTCTGGTACCCG  
TTGTTTTAGACGTTTTTGGGGCTTTTTTGGGGCTCAATTGAATCACTGTATAAGCCCTATTGGCAGCAGACACTGCGGCTCCGCCATCACATATCAGT  
TCAAGAGCTACTGCTAGCGCAGCAGTGTAGTACCCTCCGCGCATACCTACTAATACACTCAGCCAGGCACTTCTCCACCTGCCCGGTGCAGACACTCTCT  
CCCACCACAGCAGCCACTCCAGCGCTCCAGACCAAGCCTCTCCCCCGTAAATGCACCCAGTGGCGGCGAGGGCAGGTCAGGACAGGAAGGAT  
TCAAAAATTTGAAATCTAATCGTTATTCAAGCCTAATGCCCTTCCGGCCCTCGGCGCCTTGTTCCTCTTTGGGAAACTTAGTTGAAAAGATGCGACCTGTCCGG  
GCTGCTAGCTTTGGGATGTCATGCGAGCTGTGGTTTTAGATAATAAAATACACCTGAAATACAGGTGTGTGTTTTCAGCGGATTACAGTTACCCGA  
TGATTTAATGAAGTCTTATTAGACAAAGCTCTGCAAAAAGGGAGCTTTTAAAGATTTCTCCATCAGAGGCTGTCTTCTCCGAGTAACGACAGCTCT  
CCAAAAGTTTATTTCTTACGTAATATATCCCTGCTCCTCCGCAACTAATAATCGTGATGTATATTTACAGTTACGTGATGTAATATATAGTGTGCACA  
CTGAGATTACCTTTTTTAAATAATGTTTCTATATGAAAATCTTTTAAAGAGTGTACTCGTGCAAAATTAATCCTTGCTGTGCGTGTAGTTCGTTTTGTG  
ACTAAGAGATGTGATGAGCTAAAATTTAACAAAACCTCATTGTTTTCCGGGCGAAAAGCAACAGAGTTTAGAGATTTTGAAGATGAGCCGGTTTCTC  
GAGCACTAGTTATAAATAGTGGCTGTTTTTGTGTTTTCTGCTGCGTACATATAGCGGTCGCTACCGTAGGAGCTGCCCTTCTCTCCCTGAAATCA  
ACTACTAGCAGCATGGGCCCCGCGCAGTCGGGACCCGCAACTTCTCACTTAGGCGGCTGGGCACTTTGATTTCTTATTTCTCCGTCGCGCCGACT  
CAGAGGCCTTTTCTTTCACTTCTTTTCCAGCGCACGGGGACAATGCGTCCGTGATGGCGGAAGATGAAGAGAGAGATAGGCGGTGACAATATTTAAAT  
GTGAATGTTTGGCGGGCGGGGCTCGCATGAGAGAGCGTCTGCTGACCTTGTGCAAACTTTGCTGCGCTGAATGGCCGGACACAGAGAGCGCTTACA  
GCTGAAAGGGGCTCCGCTCCCTCGGAGATGAACCTCGGCTCAATGGCCCCGTTTTATTTAAGCTTCAAGAGCCGCGGTTCTGACACCAAAAA  
GCAACAGTTAAAAGAAAATAGACTGCTGCTAAAAGAAAGCCCTCGGAAAGAAAGGGTCTTGGCAATACACAGAGCTTCCGCGAGTGGGAGGGGGCTTTC  
GCGAGGAGCAGGAAAGTTTGCACAAAGGGCGAGTCCGGGGAGAAAGGAGATAAATTAATCAAACTCCCGCTGGGAGATAGTTTAGTAATATCAGAG  
CACCGCTGTTGCGAAGAATAACCCCTTTTTTCCGGGATGCTCTTTTGGAAAATAAGTCCCTTGTGTTGCAAAAGTGTCTTTTTAAATCAATTTAAGACT  
TTTTTTCCTCCGTTTGCATGCTTTAATGAACGAACACTACCGCTGGATGTGAGAGAGAGGATGAAAGGTGGGAGAACCCATTTGAGAGTAAAATTCGAAG  
GATTTCAATTTCTATTTTTTATTTCTCCGAGCGTTCGAGGATTTGTGCTTTTGTATTGATAAACACAGAGTGCCTTGTCTTTTGTGTTTATTATTTCA  
TTTTCGTGTGTGTTGGTGTGATGAAGATAGGAAACAAAAAGTAAAATGTGCGTTATGTTTTCTTATGTTTGCATGTTCTTTGAAAATAAAGGTTTTATT  
TTTTGCGTAGAAGTAATATGAAATAGATTGTAATTTGTCTTCAATCATGAGAGTTTTATACAGTCTTTTAGTTGGGGAGACTGTGTTGGCCATTTTGC  
TGTGATTCAGTAAAATAGTGAATTTATGAAAGAAATGTCCCGGGGAAAAACAAAAGCGAAAGCGGTTAGTTCCCGTTAAAGTGTGTTTTCAATTTGTG  
CGGGAACTAATAGCGGTTGTGGCGGGTTTTAAGGCTGTGTTTATGCTGTCCATGGCTTTTTAAAATACCGCGGGCGCGCAGGGTTTTGAAAACGGGGAA  
ATTACATTTGGCGGAAATGTCCTGTTCTTCTGGAAGTTTAAATGCCCTGTTTTCTCTGGAGGACTTCGAGAACACATTTCTGGGTTCCCCACCCCTTC  
TCTTCTGTCAGTGTACTGGCCATTTACAGTGGCAAGTGTGGGGAGGGGCTTACTGGGACGCCCTTGCACCCGCCCAGGACAGGACTTCAGAGCTCAT  
AAAGGACGCTTCTCTCACTTCACTTTTCAATGCTTCCCTCCACGCTTCCGCTTGCAGTCTTCTTAAAGTCCCTTAAAGTCCCTTCCGCGAGGGA  
AAGCAGTCTGGGACAGAGAAGGCACAGTGCAGAGAGCCAAAGAGGACAGAGAGGCCAGCAGGGCCAGAAAATGGCCAGCCATAACATGTGTATACATACA  
TACACACCGGATGAAAGATGAAAGTGGCTTTGAGAACAATAAGAGTGGGGAGGGGTTAAACATGCGCACGTTTCTCACCCAGGAACTGCACTGTTGCAG  
AAAACACCGCGCTGTTAATGTATGAGCGGAGCGCACACCCAGAGCAGCAGGCGGATTTCCCGTCCCGGATTTGACAAGTGGGAGCCCTGGTAAAG  
GCTTTGGCAATGGGGATTTGGGCGGTTAAGGCTGTGTTTATGCTGTCCATGGCTTTTTAAAATACCGCGGGCGCGCAGGGTTTTGAAAACGGGGAA  
CGGGTTACGCAGTTGGAGGAAGAGCTAATGTTGGATGGGGATTTTTCAGAGGGGAGGAGAGCGTGGTGGAGGGAAAGACATTGGTGGAGGGGATTGC  
ATTTGAAAGGGGTCAAAACCTGGAGTTCGGAGATCCACTTTTGGTGAATCAAAACATTTATTGTTGTTGGGAAATATGACGGGAGAGACATTCCAGGGGAGA  
AACATTGCTGGAAGCGAAGTATTAATTTGGGAGAGACATTTGGGAGGAGGGGAAATGATGGATGGAGAAACATGATAGGGCATTTGGTAGGATAGAAAC  
ATTTACACATTTAGGGGTATGGCAAGTCTAGAGACAACAGTGAAGAGATAGAGAGAGATGATAAGGGGGACATTTGAAACATGAGACATTTGGCCAGGAG  
AGAGACTGATGGAGGTATAAATGCTGGATGGAGAGACATTATTAGCGGGATACATATTGAAAGAGGAGACATTCATGGAGGGAGACACCTTGGTGACCTA  
CGAACACTGGAAGTGGGAGAGACAGTGGAGGGAGAACATTTGCAATTGGAGAGACATTTGAAAGATAGAGACAATGTTTTAGGAAATGAAATTTGCTGGA  
AGGAGACTTCCAGGGGAGAGATTTGGGAATGGAGAAGACACTGGAAGGGAGTCACTTTGTTGGGAGAGAAAACACAGATGAGGGTTTTGAGTGA  
AGGAAAATTTAGTCAGGAGGGGGCTTTGGAAAGTAGAGGCTTAGAAAGAGGCATTTAAATGACGTTGCAATAGGGAACATACATAGGGAATGGAAGATA  
TGGAGTTGGAAGACAATGATGGAAGCAGGGAGACCATGCTGGAGACAGGGAGGCATGATGGAGGAGGAGGCAATTTTTAGAGGGAGAAAGACACTGGT  
AGGGAGTAGGAGAGTGGCAAGTCTGTTGGGGTAACTTACTTAAAGGAGTAGAGCGGCTGTAGCAGTCTACTACCTCTTGGAGAGGATAGACCTAATGC  
CGGGGACATGCTTTGGTGGATGGAGGAGGGGGAGTGTGGGCTTAGACACTGAGGCAACTTATGAACGGGAAGGACGTTGTCATGAGCAGTGTGTG  
TATTCTTGTGCGTGTGGGAGCATATTTCTGCAGTTTTTGCAGCAAAAGCTGTTGAGACTGTCTGTGTGTGTGTGTGTTGTGTTGTGATACAGTAGG  
TGTCTCACCTGCAGCCGTGTTACTGAAGAGGTGAGGGGATATCCGCAATGTACCAAGAAACAATTCGATTTGATTAACCACCAATCTGCTGTGTAAT  
GTATGTTTAGAGGGAGCCGGAGCCACTCGAGGGATCAGAGGATTAACCGGAGTGGGCGAGATAATGAGACAGAGAGGGGATTTGTGCTAGCTGTAGT  
GGAATCAGTGCAAAATAATGGGGAGCCAAAGAGAAGGGTGGAAAATGGTACCGGTAAGTGCATTTGGAATAAAAGAGAGAGGAGAGACAAGGATGAAGA  
AGAGAGCGGGATGGGGGATTCAGTTCTGGGCAATAGAAAATGGGATGAGGATGAGTGGGTTGGGCGAGGGGAAAGCAGGAGATGACAAGAGTAAAAGA  
GATAAGGAGAAAAGGAGATAAGTGCAGCAATGGGCGAGAGGGGATACCTGAGCAGAAAGTACAACTTTTAGCAGTGAAGATGCAGCGGATAGGCAGATA  
GGGGAGGGAAAGAGAGAAGAGGGGAGGTTTGGAAATTTGAGACATGTCCTACTGGCCCAAAAGAGACAGAGAGCAATATAGAGAGAGTGGGTGAAA  
TTGGTGCAGACAGTGGAAAAGTGGAGCCAAAGAGAAGGGTGGAAAATGGTACCGGTAAGTGCATTTGGAATAAAAGAGAGAGGAGAGACAAGGATGAAGA  
CAGTTATAGTAGAATCAAAAGATAGGAGTAATTAGTGACATGGAAGAGTGTAAATGGAAGTGAATGAAGAAAACAGGAGGGTACAATGTAGAGAGGGGA  
AGAAATGAAGCGAGATAGAGTGGGAGATATAAATAAAGGGACCAATGGGAAAAGAGAGACAAAATAAATCAGCAATCGAGAGGAGAGCAGAGAAAAGACA  
AACAAAGATTTGGGAGAGGGTAAAGGTATTTGGTAACTGAAAAGAGGGCAAGACATAACTTATTGTAACCGGATAGAGTGGCAGTGAGAAAATTTGGAG  
CGAGTGGAAAGTGGAGATCAGTTGAAAGAGACAGAGGTTAGAGAGTGAACAATAATTTCAAGAAACAACCAACAGCAGATTTACCAAAATGATGACATACA  
TAAAGTGAAGAACAGCTGAGATGGAGGGGTTTGGAGAGAAAATTTGAGAGATAGTGAAGTTAATAGATGATGTCAATAGCAGAGAAAATGGAGAAAG  
TTACAGATGATGTTGAATGAAGAGAAGGAGCAAGATAAACCACTAGAGAGTCTGTGTCGACTTGTCTGTGCGCTTTTGAATGGGAAGTGTGTAAGGGGCT  
ATGGCAGTGGCAAAGGGAAGATCTGTGCTTCCGCTCAGTTTGTGTGATTGTGAGGTTGATGCAAAATGTTGTTGTGTTGGAGATGATTTCTGTATGCA  
GAAATTTGCAAGGATGGGTGAGACAATTTTCCAAGCAAAATGAAGATAAAGATTTCTGAAAACAACCAACAGCAGATTTACCAAAATGATGACATACA  
GTAAGTGTATCACAACAACTTTTGTATCCAAATACATCACAGTTAACACAGTCTTATAGGCAAGAATGTGAGAAGGGCCTGAGGGGGTGTAGAGTGC  
ACAGATTTTGTATCGTTTTGGGTTGACAAATTTGTCATTTTTGGGGTAAATGTTTTATCTTGGTGTGTTTTTATGTTGTCAAACCAATGAAATCACTTC  
TAGTGAATGAAATGGAGGCAAGTATTGCTCAGGATTTAGCTCCGGCTTTGTTAAAGTGGCAAAATTCGGTATTTAGAGCCGGTTGTCCCTTTTCACTCGAGA  
TTAACAGTAAATCACATTCCACAGTCTCATTTTTGTATTTTTAGTTTTTACCCCTACAAAACAGTGATTTCTGCAATATAGACTGTGACGAGCAGAAAC  
AGTAGTCTGAGTTCAATACATCGATTTGGCAAAGCACAACCTATGCTAAATACACTGACTGTATAAAGAAATTTGTCATAGAAACGTGTTCTGCATATT

ACCTGTACTTAAACCGTTCATATGTGCATGTGATAATCACCTATTACTGTTACCAGTCCAAATGGTACTCATTATGTTAACATTTGGAAGAATGAAAA  
GCTTGGTCTTCCCACCTTGGGTTCAAACCTGCAAAAAATGCTTTATGGTGAACACAGTTACTAGCAGCAGGAACCTAACTCACATCAAACTCCTTTCACT  
TCAATACACTTCTTATAAAGAAGTTTCTGTGCATGTAAAACAGTACACAGATAAAGTCAATTTGCAAAATACATATAAACATTTAAGTATAATTTGTGCACACT  
AAACATAAACATGAGCGAGCGGCACACGTTCTACACAGTGTATTTCAAAGGCCCTGTGCTATGAGCTATTGTGAAAAATATTCACGCTGCTTATGCCAA  
TTAACAGAACTCACACTCTGCATGATTTGCCATTGGCGGTGACTCAATCAATACAACTTACATTTGAAAAGATGGAACACACACATCACAGGATGAAAA  
CCAAAGTGATTTATTTGAAGCCAAATGGTGTTCACGATGTAAGCAGTTGGCCTGAAGTAAATTTACTTTTGACACTTAAATAATTTGGGCCTTCGTCGCT  
CAGAACCTCCCACAAATTTGATAAATAACCATATACGCTTATGTAATGTCAATATAATTTATAGCCAGTACTATGCTAAAAGTGTGTTTTATGGCCCCAGTGC  
ATGTTTCATTTAACCCCTCACAACTGGACCACCCCATTTGTACCACCTTGTGTAAAAACATGTTTGTGACGCTCTGATCTTTTTTTCATTTCTTTTG  
TAAGGTGCTTCTGATTAACCACCTGTGCAGTCTTCCAAAATAACAAAGTTAACTAAAATAAAAAGTTTGGTGTGTAACCTTTCCAATCATCTAAGATAC  
TGAGACCATACCTTCAAAGTGTGACATCCAAAATCATGTTTCAATAGCCCCGGCGGTGTATCAGAAGCTTGTCTTAAACAATTTAAAAGTTGGGTTGCTTTT  
ATTTGGAGACTCCATGTAGCTTTTCTCCAAAATTTGAGGTACCCCTACTTCCATCAGTAAATGTCTATTTCTCGTGGGCTTATAAAGACAGTGTAGAA  
ATTGACTCTGGTTTGGGCCAATACGTTCCAGACCCTTACCCCACTTGTATTTCTACTTATTAATCCAGCTTCCATCTTATACCAGGCATTGAAAATAATGT  
TTATCAGTTCCAGAATGGCTTCCAAAATTTTCATTTCCATTTTTCGGAAGTAGATTTTTCGCCCTAGAAAACCTTGAATACAGGCGGTTATAAATGACATATC  
AGATCATGTCTTTGTATTGGCAGGACCCAGACTGGATAGCCACATAATGCTATCATATTTATAAAGATTCATAATCTCCAATAGTGGTGGGAGGAGGG  
CAAGCTCATCTTTTATATAATGATGATCTTTGGTATTTGCCAAAATAAACATAGTGGCAGACTTCACTGAGTCCAAAACCTAGCTGTTTTGTTACTAAAT  
ACATTTCCAGTTTAGGCCATATTTCTCCTGTGATTAATACACTTTCATTTGCCCTACTGAAATAAAGTACATTTTTAGTCTCTCTGTTCAGTCCATAACACAGT  
CTTCTCCCGCAGCATCTTGCAGGCGGCTGCTTATCGACCTCAACATCCCTCAAGTCTTCTGCTTCCAGGAGCCTGATCATTTCTCATGTTTTAAGACAA  
AGTGGAGACTCGTAAATCCCTTTCTGGGAAGGCCCTACTTGTTTGGAAATGGCTACCTGCAAGAATTCAGAACGGAAGACTCATTTTTTTGAAGTTTCTTTA  
AGGTGCTTTAAGACCTGGCTGTGTGCCAGAATTGGAATTTAGGATCTTCTGTTTAGTTATCATTTCTTTTGGGTTCAAGCTCTGCTTCCGGACAAACGTTT  
GCATTTTACCGAAACACTAAAGTGTGAGCAGAAAGGGGTATCACCCAAACAGCTCCGGTCCGAAAGGAATGAGGAAGAATCCTTTCAGAAATGTGGAGTATTTT  
GGCACCTGTGAGCGGAGTACACAGACTGATTTGGTGGTCCCGTGTGCATTTTCACTACTGTTATCTCTTGTATTCTCCTGTGTCATTAAGACGATGGT  
GGCAGGTACTTACACACACACATAACGTCACGCTCAGCTTAAAGCTTAAAGCTACCTACACATTAACAGGACGGAAGGAGTATTTCTGTGTGGGCA  
GTTGGAGAATAAAGAAACAAACCTTCCAAATGGACAATGAAGTTGCAAGTGCCTACTCTTTTGTATACAAGCCAAACACTAAGTCCAAGCTCACGTTA  
AACTGGTGTGGCTGAACATTTTACATGCTGTGCAAGCAGCAGAGGAGAGTCCGCTGTGTGAGTGCATGCAATATGGGTGAGGAAGACTTCAAAGGGATTC  
CTGCTGCCGGTGGAGGCTCTCCGGATTTACTACACATCTTCTTACAGCCGTGTCTGGCTTCTGCTGCATTTGTGCTCTGCTTCCAGGGGATCCCGCAGC  
CCCCATGCTGGCCAGAGATAAGCAATCAGGCTGGATCCTGCTCTCTTTGCTTTGCTTAAAGCTTAAAGCTTCCCTCCTACCCTCCACTCCAAAACACTCAGA  
CATCCGCACAAAACCTGTAGATGCTTAAACACTGCAGCTGCCTTTATGTGAACAATCGCAAACGATCAACACCCCACTGAGGGAGGAGGTGATGGGGT  
TATAGTGTAAATTTCAAGCAATTTAAAATGATACATTTACCCTTAGATAGCATCCCAATATCTCTCTCCTCACCACCGGCTGTCTCCTTAGGCGTTT  
CAGTCTCACAGTCCCATAGTACAGGAGTGTCAAATTTGAGCCCTGAAAAGCCACTAACACCCCACTTAAAGGATAACAACCTGCCTTTGTATATAAATCC  
GGTTTAGATTCATAATAATTTGAAATGCAAGTGGCCATCATGAAAATAATAGAGATGATTTTAGCTCTCCGGTCTGGACTTGGAGCCCTGTCTATATACCGAA  
GCAATGGGTGAGGTTACCCCAACCATATCTCGTCTTCAAGATAACTTGAATGCCATAACCAATACAGAAGTGTGTGTGTTTTGCCACCCACCCCTAAGAA  
AGAGGGACTCATTTATCTACCTGGGTGAATCTGCAGGAGGCAGGAATGAATGCAGTGCATGGGGCACAGGGGGCTTGAATGAGATGTTGATGGGTGCAG  
GAGAAGGATAGTGGGACTACCAGCAATGCAGAGGCAAGGGCTGGATTTTCTATCCAGAGGTATAGTGGTAGAAAATAGGGGGTGCATGCGTCAAT  
GGTATAAGAGAAGGGATGGAAAGCTGCACCATGGTACAGGAAACGTTGCTGGTATATGAGAAGGGATTAAGAGAACCTCCAGGGGTATGTTATGTTATAG  
GATTTATACGGGCACAGTGCACCTGGAATAGGGGTTCAAAGCCAGGAGGCAAGGATTTGATGGTGGAGCCATTAGTGACAGGTGTTACGAGACAGAGAT  
TGCTAGGCAAGTATTTAGGGCTCAGAGCGGTTGCTAGGGGTGACTAGGGGCTATAGCCCAAGGCTTTTGGTGTAGCCGGGATAGAATCTCAGGGACT  
ACAACAAAAGGCTTACCAGCTACAGTCCAGCTGACATTTGGTGGTCCGATTTTTCAGAGCTTTTTCAGAGACTATFACACCCCTTTCAGGGGTTATACAT  
ATTTGCAAGAGGGAGATAACATGGCTGCATCATGTTTGCAGAAATCAGAGTCTAGTTTGTCCCAAGAGTTCAAGAGGTATTACTTGTGTGCTATGCCAGGG  
ACACGGGTGGAGTCTGTGTCACATGTCATAGGCAAGAAATGAGAGTTATGCAAGGGGAACATGAGAACGGCTTGTGTGCAAGTGCAGGAGTCCAAAGCAAG  
GTAATGTGGCAGTGAATGAGAAGCACAGTAGGAAGGGATTGAGGGCTGCTTTGCGGGTGCAAGAGGGCAAGATTATACACTCGATTTGGGTTATTTGGAGG  
AGCAATTAAGGCTTTTGCACAAGTTTGAAGGAAGGCTGTGTGGCTTCCAGGGTTTTCAGAGAGCAATAAGTGTGCTCCATGCTAGGTTTACATCGGTG  
GGGAATGTGTATCTTGTGTAGAAATGTGTTATTTGATTTGCGGCTTGTGATGCATGTACTGATGGTGTATTTGTAATAATTAAGATTTGTGAAAAAACGTTT  
ATGAAATACATAGAGAAGGGGCTGTGGTCTTACTGGGCACACAAGGCAACCATTTGTGGAGTGTACCAGGAATATGGGAGGCAAGAAATTCAGAGTGTGC  
TAGTGTGGTAGTAGAGGAGGTTTGTTTGGGCTGTGTGGAAATGTGAGTGTGTGTTGTTAGTACTGTAGGCATTACTTATGCTATGCTTGTGTTGTTAGG  
AAATGAAGCATAGATGATTTGGCAATGATCTTGGGCTGTGCCATFACAAATCTGAAATTTGCGAGGAAGGAATGAGTGTAGCCCTTACCCCAAGGAAATG  
TGAATACTGCAATGGCCTGTGTCATGGACGCTCTATGGCGGACCACGTACTACATATCCTATGTGTGTTGGCTGTGCATATGCCCCATGATGAGCTAAC  
ATGAACATGTTTTGTGCAACTATCAGCTGGCATACTTTTGTCCAGCCGGCAATATGCCATTATGCAATAGTTCACCTCGTTCATGCTAGTGCACCTCC  
TGCACTAACCTGGTGTGCACACCTACAAGGGAGTGTACATGGTGGCAACAGATGCATTTAAATTAAGTTCGTAAGTACAGGAGGTGCATGCTCTTACCA  
CGCCCATACCTTCTCCCTCACCTTCCAGGCACACCTTAGTGGCTTCGAGTTGGCATGGAAGGGGCAAGGGGGTAAACCCCAAGGAAATTCAGCAACCA  
GATGCCAGTCCGAAAAATGTGTGTTGCTTTACATGCTGCAATTTGCTGTTTTTCTTTTACACTTTGGGCATAAATAGTTAGTAAATTTGCTACTTTCACAT  
GCCCTGCTTAAAGGTGGCGGCAAGGATTTACGCTGATGAAAATGACTAGAACTTGGCGTTTTTCTTTTAACTATGCAATTTTGGGTTTAGATTAATC  
ATTTTCAGATGTTTAAAGTACATGTTAGCCACATGAATACACGCGGCTGTATCTTTCACCTTTTCTGGGCATCACCTAAAATAATGGAATAATGAA  
TGAATACTACAACCTGTCTTTTTGCGACTTCCAGGGCTGTGATTTTAAACATTTCTGCAAAATGCTTAAATTTGTTGTTGCTTTTATTTTCAGATCTGTCGA  
CTCTAGCTTTAGCTAATTTGAGGACTGTATTTTTCTGTCTAGAGATGTTTTTGTGTGTTTTCTACTCAATCGAATFCCCGGCCAAAAGGTATTTATTTTAACT  
TTGACCCCAACCTTAGAGCTCAAACCTACCCCTGGTTTTATCCCAAACTGACTTTTCAATCCATATTTGATGCTTCCCTCCCAAGTACGCGAAAACCTTTT  
TCGTTCTGGGTAACCTTAGCAATACCCTTAGTGGATGCTTACATTTGGTACGACACCAAGTACGCGGATTTCTGTAATTTCTGAGTTTAAAGTACAAATCTCCGAT  
TTTTGATGCTTGTTTTCAAGATTGAGCAGAAAGAAGCGCGGGCAGTCAAGTGTGCGGTGAGATGAAAGAGGGCGCGAGAAGGGGGCGGTGTTAGAAAATAAA  
GGATGAAAGGAAATCAATGTGCATTTGAAACGAGATGCGGCGTCTCTTTGCGAGCGTGAACGCTCCCGAGAAAATAAATGGCATTTCTTCTCTACGAATAG  
AGAAGGAAGTAAACGGCATATTTGCAAGTTTCAAGTGTCTCCCTTAAATCTGCGAGCGCACATTTTCGAGGGCAACAGCTGTAGGAGTGGCCATATCAAAA  
TAAAACAGGGCACCAACCATATTTAGTAGACTGTTCTTATATAATATGTTGTGATAAATACCCCGAGCTTTGGAGTTCTAAGTTACAAATTTCTCCGAT  
CGCTTATTTTTTGAAGTTCAAAAAGACCCCAATFCAAAACGAAAAAAAAGTTGATGTGAGGAGGGCAGCGGGGATTCGACCAAAAATAAAAGGGGATTT  
TTGGCGGTGAGCAGAGATCAGAAGGTAATAGGACCCCTTTGCCCCGTTCAACCCCAAGTGGGCTCTGACCTTCGAGTAAGTTTGGAGAGTTTGTCTCT  
AAGCAAAAGTCTCTCTTCAACAGCCACCTCTCTCTCCCAACCCCGATCCCTTTAATTTGAGAGTGTGCTTTACTCGCTACACTTTCTGCGGGTGTCT  
AATGGGCAAGTTTGAAGACCATCTFAAGAGGTTAGAAACCTAACCCGAGCCCAAGGCGCTTTGAAAAAGGATACCCCGGCTCTCCTAGGAGTGTGCA  
GCCGCCACTGCCTAATCTCTCTTATGATCCCGACAAATGCCAGGAATCCCGTCTGCCCCACCCACCCACAAGCCCAACAAAAGAACCCCGAGGAA  
AAGGAGGGGGCGGATCATCTTCACTATTGACTTAGTGGTGAAGTCAAGAGTGAACATGCTGGGCTCATGTGAAGGAGTACCAACAAAACAAATGATGT  
TTAGTTGCAGGGTTCTGCGGAGCACTACAACAAAATAACACTAATAACCTCGACACAGCCGCCACCCCTCCCGCCAGAGTCTCTCTCTTTT  
TTGCACTTTTAGTTTTTCCAGAAATGCAAGAATCACGCCGCACTTTTCCATTTTCAAGCAACAGGTACAGATGTTTTCTGCGGGCTTTGGACTTA  
TTTATGATTCGGGGGACCCGGGACGATGTGGCTGCTTACTACAGTCAAGCTGGACCGGTATCAGTTCCATTTGGAGGTGAGCAGCTCGCAGCAACCTGA  
GCAGGTTCTGACCCGCACTCAAAAACCTTCTTAAAGGAGTATTCTTCCCGTGTGCTACACTTATTTGTGCTTCTTAAATTTGATCATGAGGAGT  
TAGAGGTTGGATGGGAGGATGTTGGTAAAGGAGTGGTTGATATTTAGCTTAGCTATAAAGTACTCATTACATAGGCACTGCAACATTAACATGAGG  
TACAGGATATTTTAAAGTGAACCTCATACGTCAGTGAACAAAACCTAACAGTCCATCGTATAGTCCACAATTTGGCCTTCTCCTCAAAGTACCCTCA  
GGAGAGTAAAGTGAATACATACCAGGAATATTCATCATGACAAAGGAGCGAGCTCTACTGGAATTTACCAGTCCAGTGGCCATGCTGCATGCTCTT



GATGTGTTAGGGATTTAACTCACACCAGTAATATATGAACTACAACCCCTGTTGAAATATGCTTGAACATTGCAAGTACGCTGTGGTACAAAACGCAT  
GGGTACTATATTACCCAGACTGTGTTCCGATGATGCTGCAGTAATTAATGTTCTCGATTCAAATACAAGTCTAGGGGACTTGCGAACCTTGTGAAGAACCA  
GAACATTAATATATTCGAATGTGAGAAATTCACGCACGGATCCAACCCAGAAAGAGTTTGGTGTATCCACAACCTCACATTAATGGGCTGATGTTACATG  
GAATTAATTTGGCCGAAAAAAGTGGGATTTGTGCGCCATTTGCGCCGAAATCCCATTTGTTAAACAGGGATTTGCGGGCAGAATGGCGCACAAATCCCCGT  
TTTTTCAGCGCAAAATAATCCATGATACAGCCCTAAATCTTTGTTACATCGTTGATGTGATCAAGAGGAAACATATATTTGATGTGAACAAAGAGTAAAG  
TCGGTGTCTATTGAAATTCAGACGAATATCAAAATGTACCACCTAAACCACCTTATCTATATGCCAAATCCCTAAAAATGAGTGTGTGAATTTGAAAGCTAT  
AGCATACAGATGACCAGCTTCTGTGAGAACTGATGAGGAAGGACATGAAAAATATCTGCTGCCTAATAATGTTATCTTCCGGAAGAGTGTCAAATA  
GCCGTGTGTACCAACTAAGGTTAGTTGAAGAGCCCAAAGACAACCTGTATGTTGTTATTTTTTTGCAAGAGATCTTGCCGTGACAGTGCACCTCTTGCTTGT  
ATCCCTGTCTTTCCATGTACAGCTTGAATGCCGCAATACACAGCATGTGTATCTTAATTTGCCATATTTTCTAAACCATTTTATAGTTTTGGGATGC  
AACACCACCTGTAAAGCATTTGATTTACATGGTAGGGAGTTGAAGAGATTTGAATTCATTCAGCATATTTAGCACTGCATTTTGGGTAGATAAGCAACAGCA  
ATCCCTATTCATACGATACGATTGTAAGACCAATGATGATAGCACCTGGCATGATGGCAATACCTGGTAAATTTGCAAAATCCGAGAAATATTTAATGTA  
ACCAAAATCAAAGCATACTAATCAGACTATGATGTTTAAAGAGTTATACTACTGTCTTGTCTTAAACAAGTACCAGAGAGAGGGCAGACTCCGAAAAA  
GTGAAATGGCAGTTGAAGTAATTAACCTAGAGGTAAGCCGAGCTTCTGTTTTTAAAGTATTTAGCTTTGAAATAGAGAACAATACGTTGTGTTTGGTGC  
CATCTACATGTTGGCCAAAGCTGATTTAAGGCAACTTTTATGATACACACTATTTGATATCAGTATATTTCTGTATGCATGTTACCAATTTCAAATTA  
CTAGGTCATCAATCGCTTAAGTTTCAATGTTAATCCCCCTCTGCTTAAACCCAGGAAATAGCTAGTTTGAAGTGTGTTTCTTACTTAGTAGAC  
GCATGTGGGTCCATGGAACACCTAGATATTTCTAGACAAGCTGATCGGCTGGGGTCACTCAGTTACAACAAGTGTGATGTGACAGGCTCTGCTAGAGGCC  
AAATGGCCTTTCAAAGACTGGCCGTGCTGAATGCTCTAGATCCCACTGTAAACACACTTCCAGCTAATAAGCTCGGCCCTGGGGCGCCCTATGTTCCAG  
GGTACCTGTAATCGGCTTCACTCAGATTTCCAATACTTTGTCATGACGGGAGTCCGAATTTAGAATCACCTGGCATCCGGAGTGTCAAATTTAGTAA  
TACCTAGCTTTCTTTGCGGGAACAAGAGGGCTGTCCCCATGCCCCCCCTCATCTGGCAGAGCTAATATTGCACGCTCTGGGGTGGGGGTGCAATCC  
AGCACTTCTTCTCTGTATTGCAAAATACTGAAAGATTAGCACAGCAGCTGTGGAACTGGGCAATGGCCAGGGATAGGAACTGAACGGGATGGGGA  
AATTAGAAAGTATCCCACTCTTACCCTTCTAGAAAGTAACTGCCCAATCAGCACTAACATCACCTTGTCTCACAAAACCTGCAACTATTTGGA  
AATTTGAGACTCAGAACTTTTACATGCACCCAGGAGCCAGGACTTTTACGTTGCTTCCATGTAGTGTGTAAGCACTTATGTCATAGTATTTGGCC  
CGTAGCACCGTGGGATGCTTGGATGTGCACAGGTGCTCACTCTGGGTTAGCAAGCCAAATGCATTTGTACATATGTATGTCTACACATATGCAGTGCATTCA  
TGTTTTCAAATGAAATATATTTGGCAGGGATCAAAATCTTGTTCACAGACATGTTATATATACAAATATATATATATTAATTAAGTGCAGTCAAGC  
ACCCAGTGTGGGTGTAAGTCGTTATTTTATTTATGTTATTTGTGATTTGTAAAGCTTATAACATCAAGTAAATTTGTTCAAATAATCCACAGGGC  
AGCAGAGGGGAAACAGGAGAAAGCAATAAGACAATAGAGCAATAGAGCGGACTACTGCTTTGAGACTTATACTGAGTAAATTTGAGTGTGAGGAGAG  
AGGAGGCCAAGGGAGTGGGGTGGGGATAAGTGTAGTGTATCAAGAGGAACTGCTAGATAGTGCAGCTGTAAGTGCAAAGGTTGAAGTGGTCAAGC  
TGCCAAATAAAGTGCAGGAATGTGATGACATATGCCAGTGGTGTCAAGGCAAGTGTGGGAGGGTGGAGGCTGTAGGCCATTGGGTGTGGGAGCCCA  
GGATCCAGGAGGACACATAAAGGCCCTGTCCCAATTTCAAGCACTGTGGCATAGCAGGGGAGGAAGGAGTGGTGAAGGAGGGGCTTTGAGGAG  
CTTCCGTATTTTGAAGGATCGAGCTTAGCAAAAGGAGAGGGAGGCTGTTCCATAGGAGGAGCCCTGCTGAGGAAAGAGATTTGGCCACCCGCTCACTGT  
TTAGTGAAGTATTTAACACACAGATAGTCTGTGCCGAGGAGCATAAAGATTTGGAGGAGGATTTTAGTAAGAGTAAAGTGTAGATAGCTGGTCCCGG  
CACCAGACAGCTTGTAGATGACTAGAGGGATTTAATTTGATCTTTCAGCAACTGGGAGCCAGTGGAGAGATTTAGGGCTGGAGAGAAGCGGTCCT  
GGGCTGTAGACCAAGGATAAGTCTCATAGCCCTATTCTGGATTCGCTGGAGGGGCTCATAGAGAAGGAGAAGATAGATTAGGAAGAGGCTATTGCGATG  
TGTCCGCTAGAGAGATCTAGAGCTTAGAGACATTTGAGCTACTGGGGAAAGTGAAGTAAGAAAGAAATCCCTTTGTTGGGGTGGAGTTGCAAGTGGGACTTC  
ATGGCAAGTCTCTGAATAFGAGAGATGAAGGAGAGAGGAGTCAAAGATAATTCAGAGTTTCTGGCTTCAAGTAAAGGAGATCCCATAGAGG  
ATGGCCGGAGTGAGGGACAGAAAGAGAGAGCAGGAGACCCAAATAGAAGTACCCGCTTGTGCTTGGGTTGAGGAAAGAGATCATTTGAAGTACACACCATAC  
TGAATGGCAGATAGGAGTACAGGAAATGACAGGGAGTAGAGGATCAGAAGGAGTGTGAAGAGAGTGTGTTTTCATGCTGTGCCATCTCGCAGTACAGT  
TGGTGTGTTTTTGTGTGTTTTACATATTAATTTATATATATATATATATAAATAATTTTTTTTTTTGATTTGCTTTTGTGTTTGTCCCATGTATATTGCA  
TTCCCGGTCTACAAATAAATACAAAGACAAATAAAGAAGGGCTGCATGGCAATGCATGGCATACATTTCTATAAAGATGTGTTTGATCACATCATCAATATG  
GTAACATTAACAAATGTCATTAACATCAATGTCTATATCTTATTTGAAAAAGTTACAGTAATACCATGGAATGTGATGCTGAGGATTTAGAGTGT  
GGTGTGTTTGGTAAAGTGTGATGTTTACAGAGTAGACAGAGCTGTAAGGATGTTTAACTGTTTATATGCTGTGCCATCTCGCAGTACAGTGTGATG  
AGAGTCCCCTGTGCTTGCATGAGAGTGGCTATTGTGAGTCCAGCTACGAGTACTGACGTTATTTCTGAGGAAGGAAAGGAGCCAGGTAAGAGGATGGA  
AAAAGGGTTTTCTGATTTGAATGGTGTGAGGACACAGCCCACCGATTAACAGAGAAATATAGCAAGAAATCAACTTTCACATACTGAACAAAGTCTCCA  
CAGTGTAGGGCTAATCCCTAGTAGCTGACGGTACGTGCACATAAGGAACCTGACTATTCATTTTGAACAGAGGCTTTACGATATTTTACCAGCAGTT  
GGGAAAAGGCTACATAGAGGATCACTGACCTACCAACTGTCGATACATCTCACTCTTCTTCTTCTTCTTCTTCTTCTTCTTCTTCTTCTTCTTCTTCT  
CCTTCTCTTCTTCTTCTTCTTCTTCTTCTTCTTCTTCTTCTTCTTCTTCTTCTTCTTCTTCTTCTTCTTCTTCTTCTTCTTCTTCTTCTTCTTCTTCT  
TCTTCTTCTTCTTCTTCTTCTTCTTCTTCTTCTTCTTCTTCTTCTTCTTCTTCTTCTTCTTCTTCTTCTTCTTCTTCTTCTTCTTCTTCTTCTTCT  
TTTTGCTTCTTCTTCTTCTTCTTCTTCTTCTTCTTCTTCTTCTTCTTCTTCTTCTTCTTCTTCTTCTTCTTCTTCTTCTTCTTCTTCTTCTTCTTCT  
GGGCACTCTTCTTCTTCTTCTTCTTCTTCTTCTTCTTCTTCTTCTTCTTCTTCTTCTTCTTCTTCTTCTTCTTCTTCTTCTTCTTCTTCTTCTTCT  
ATCCAATATCAGGGCACCAGCAAGCTCCCAATCTCCCATACCTTAAACCCGTTCTCACCACCCGACACACCAGTGCACCCACCTAGATGCTTCACTG  
CTACTCTATCAGCATTTTGCACACCTTCCCTTCTTCTTCTTCTTCTTCTTCTTCTTCTTCTTCTTCTTCTTCTTCTTCTTCTTCTTCTTCTTCTTCT  
AAGCACATACTGAAGGAGAACTACTCTTAAAGAGATACACATGCTTCTCTCAACCCTCGGACACCCGCTCCCTCATCCCATCACTTACCCTTACCCT  
TTCACTAAGCTTCTGAAGCAGATACACAAGCTCCTCCCTCCCAACTTTCTGATCACTTTTACGCCCCATGTCATTTACCACCCACCTTCACTTCCATG  
GCCAAGCCCAAGAAAGCTCTTGTATACCTGCTCGAGGTTGACCTCCATTCAGACACAAGCCCTCCCATCTGTGAAATAGAGAGCTTAACCAAGTGTGATCTT  
TGATCTTTAATCATTGCCACGCTTGTGGGTATGAGATTTTGTATTCTAGTATTTGTCAGTATTTCCACTGCGCGCTGCCCTACTGTAGTTAAAACGTTCA  
CTAGGTCGGTACCAGCCATAGGCAGCGGTTCTGTAAGATTTTCACTTAGTACATATTTTCAAGGCTATGACACCTTACTCTTACTGTCAGTGTAAATGTA  
CCATGTAACAAAAACAACCTTCTCCCTGAAAAGCTAAAGTATAATGTTGAACCGTAAACACTGCCAGTTCGCAACACCACACAATAACAGACACGTGGAT  
GTTACAAAAGCCATTTTCGACCTAATACCGTGTCTATCTGTAGTCACAACACTGGTAAACAGGAGCATGCTTCAAGCCCTCTCTGCTCACAATTTAGCATTT  
AAATAGCTACAGACAGAAAAACGGATAGCAGTCCAGACTAGTTCAGATTTGAGGTACCAGTGCAGCACTACATTTGCATCTTTCCAAAACCTTTATGAAA  
CCACGGTAAGAGCTAAGTATACATACATGATGCATCAGATACCCACAAGAGTAAATGTGCAATTTGTTGTTCTAAAAAGAAAAAACAAGCAGCTCTGTGAAACC  
AGACGCCCATATTTCTGCTTTCATACCGGGCAAGACACTGTTAGTCCCTTACTGAAAAGGAAAGGAAATGGGGACATTTGTGAAGCTGAAGATTTGTGAAT  
GGTCATTAACCTTGCACCAAAATGGTCAAATGGCTATGACACCCGCGTGTATTTGTTTTGACACTGATGACAGAGAAAAAGAGCAGGAAAGAAAGAGAGAA  
AGCAAAAGCCTTTGGGACAGACAGAGGAGGGGTAGGGGAAAGAAAGAAACAACAACAATAAAGAAAGAGAGAAAGACTTTCCAAGGAGAGCTAT  
TCACAATTTCAAGCGATTAAGAAATGGAGTTTCAATTTTTCGAGGCAACTCCGACAAGACTTCCAGACACTGGTGTGCTGATGCTGATGAGGGAATGA  
CTTGGAGGTTGAAACAAAATCTCAGCAATCTCAGAGTCTTATACTGGGGTCTCCATAACATGCAAAAACAATGGGCCAAATGTAATGTTTTTTTTTCT  
TCGTTTTTAAAAAAGACATACAGCAAAACCAATGACTTATTTGCCATATTTACACCGTGTGACATGCAGACTTCTGGTGAAGATTACAGCCAGCTTTGG  
AGTTAGTGTAGGCACTTTCAGTATAAGCAGCACAATGGGAGCATGCCATGGCTACAGTTGGCTTGGATAGTGTGGGATGTTACATCTGCATGTAGATT  
TACAGCTTCTTGGTGTGTTTCAAGGGAGGCTACCAGAGATTAAGAGGCTAAATAGTTTGAACCTTAAGCTTGGGAGCAAAAGCTGTGGAGCAAGGATGGGA  
GAGGTGCATTTAACAGCCCTGTAGGGCAGCCGAGGTGTCAGGTGGTGCAGTGGCTTTAGAACAGATGGATTTTGTGCTTGCACCGGAAATGCACAA  
GGTCAGCTGTGATGCATCTTCAAGGGAGGACAGAGACTTCTGTACCCTGTTTTTTCGGAAGTGGCTCTGTGGACCATCAGATTTTGGCTTTG  
TATFGCATGTTTTTTTCAAAGTTGATTTTCAAGTGTGACTGACTGATGCTTATTTAGGCAGCAGGATGGACCTATGCCCTGTGTTTTGAACTATTTGCAGACTGTCAATCTG  
CTGTGGAGTTCCTTGGAGTGCATTGTCACTACTGATGCTTATTTAGGCAGCAGGATGGACCTATGCCCTGTGTTTTGAACTATTTGCAGACTGTCAATCTG  
GCATGCATGTGCTTAGGTCATTTGGTGTCCAGTCTGGATTTGTCTGGGCATCACGAGTGGTGAAGTGGGCGGGAGTCTGCGGAGGCTACTCTCTAC





GAAAAAATGCTCAGTCCAAATAAAGTGAATGAACCTGTGGTCCACGTGCAACACTATTTACAAAAGGGGCTGGTTTTGACTTGATGTAACCTCAA  
AGTTCTGATGTCACCTCGGTGGTGAATATATATGGTAACTGGTCCCTCACTAAATTTAACCCAGGCTCCCATCATCGTTAACTGATTTCCAGGAGTCTG  
TCACACTGGCAAAAAGAACTCCTCATCCTTAACTGCTCCCTACATGCTCCGCTAGTCTGCAATTTAACTTTTCCGAATGGTCTGCAGGACTCCATCCCT  
AGACCCAGATTTGGTACCTGAAATCTGACTGTGGACAGAGTCTGACTGTAAGATTATTTTCATGACATCTCTGTCTTCTTTCTGCAAGTTGATATGTT  
TTACCCCGCCGAAATGTTTTGACTCTACCGACAGACAGGAACGTGACAGATCAAACCTTGAACACCTTATTGGTTGGAATCTGCTAAAGGTTATGCTTA  
CGGTCTGACTTCTAGATTTGTTGATATTTCCCGTTTCGACTGTAATAATACGTTAGATTGCATCAGTTTTCGGAATAGTTATTTCTGATTTAAGTTAAC  
ATATCTGTCTGGACAGTATCTTCTTCTCATTGATTTGGTATTTAGTATTAGTATTACGTTGGTGCACCCACTTCTCTTCTTAAAGGCAAGGATGTGTGCTCCCA  
CAGTGTCTATCGTAGGCGTGAAGAAAGGTGCCTTTGGTTTGGGGGGGGCTCATGACGCAACCTTTTTCTGTGGCGTTAAGGGGCACTCATTGCTTTTGA  
TTGACGGTAACCCACCTTATTTTGGCCAGGAGAGCTTACCCCTTTTGGTAAACAAGGCACACTTTTTATGAAGGATAAAAAGATGTAGTACTCTAT  
ATAAATACTTGAAGAAAAAACAATACCATTAGCTTGTACAATTTGGGAAAGTTACTCTGTACAGTGTATTTGAAGTCTTTCCATAAAACTGCCCCG  
TGATTCGTGTCCAAGTTGCTGAAAGACCACCTTTTGGTTACTGGGCATAGGACCATGGCTTCTCGCCATGTCTTTGTAAGGTTTCTTGGCAAAAGGGT  
ATTCATTGTTTTGTTTTACAATAAAAAATAAATAAATAGCCTGGCTGTTATGCTGCTTGCAGACCTGGTGAGCCAGCAGGGCCACAATGCATAATGT  
TGTGGTACTCAAAGGGTGGCTTTTTATGGGGCATGTGTGCTTGTCTGTGCACACTGGGTGCCATTTTCAGGAAAGCAGGTAATGCTGTAGTGGCAGCCCT  
GAGAGCAAGAGTGGCTCATGGTAGGATGTTGGTGTCTTGGAGGTAACCTGGATTTACCACAAGGGTAAAGATGGATGACAGCTGACCGTGGCTGTTGG  
TCCCTCTTAAAGTGCAGATCTGATCAAGGCCATGTTGCTGTGCAAGTCTTGGTAACTGTTACCCACAAGGGTAAAGATGGATGACAGCTGACCGTGG  
GCTATCGGACAGGATATTTGTGGTGGCAGTCTTGTCTTGAATGTACACCTGCTCATCAAGTCAAGGAGCTGGCCTTTCATGGATTAACCTGTAATG  
GTCACAGCAACTTTTCTGGGAGTCTTTTTGGTTCGTATATTTCTTTGAATACTAGCTGTGTAGTGTGACAGTGAATAGCAGGAAAGAGTGTTCGTTCA  
GCCAAACGCACACTCCTCAACAGTGCACACTACCTCCAAACACAGGAGGATTCACATCTAGTCTGTACACGAGGAGGAACTCGTGAACATGTGTGATA  
CCCAGACACAATAAGTGAACATTTGGATGCACCAATCACATAGCAGTGCCTCCTCACATTCACCACGAGATGCCTTTTTTTTTGTTGCATAGTAAGGATG  
TGCCTCATTTCCAGGATGTTACATTTCTACTGACAAATGTTTCCCACTGCAAAATAGTATCCACATTAACACAGCAGCTCGGGATTAGAGAAAATGATACCC  
ATATCTTTTTGTCTATACAGTACTCGGTTTATGTGCTTTGTATTTGTTAGCTTTTAAATAGGAACTTAGGTTATATGTAGCTCTCGGAGTCTCAAGA  
GAAATGATGTAACCTTGAAGAAAGATGACAGTATGCACTACTGCTAGGCTGCCAAACCAAGTACACGTAACAAGGCACTCAACAACTGCTGAACTG  
TAAATGAAACCTGAACTTTGACATCTGAATTTGATTTTTCAGAACCTGAGGCTGTGTTTTAAGAGGTTGTATTTAGATGATACTCGTTTGACTAAAAAGAAAC  
AAATGGTTAATGTAATAAGTGTGCTTTGCAATTTTACCATTTTTCATTCTGACATTTGACGCTCCCAACCCACAGCCTCATCATGTGACAACTAGAAA  
TCAGTGTGGACACCACTATCTAGAACAAGATAGATATCACTGTAAAAGTCACTTTGCAACACCACCCAGGAGCTTACACTTTTATTTACTTCTGAAAT  
CAGCCCATGCTCCTCTGACCACTAAGCAACCTTTGGATAGTACTAGTGTCACTACCCATGACCTTCCCTCAAAACCCAACTGCTTAACTACTTAACTACT  
TTTACTGAACTTTGTATTTTCACTTTCAATGGTGGGCTGAAGAAATCACACTGTATCGGATGCTCTAGGCTCGATTTTCAACTCTGGGATGAAAAAGGGCC  
TCCACTGGGTTGGGGATTGAGCCAGAGTGCATTAACGCTTGCCTCTCTCCCACTAGGCTTAGCCAAACACTTTCATGAGCACCACCAATCTTATCACTC  
ATCCAAACACCCCTGGCTCGTCAAAACCTAGCACTGATGTGGGATGGCCATCCAGAATAGCATTAGGATGGCCATGACTAGAGGGCCATTTCTGCCC  
ACTTAAACACCAAGATGTTACCAATCAAAACCAACCAATACCTCTACAGAAACAACCAACCAATGCATGCACTTCACTACACACCAACCAACCAACCTAG  
CCTGGCCCAACAGCAGATGGGACTACCAACCGAAAAATGCACCACGCTCAGCGAACGGTCTAAACCGAAGTGGCTGCAACAGCAGCATCAGGCCCT  
CTTGCTCCTTTTTCCCACTCAGTCTTATTAACCTTCTCCCTGCCCCCTCCACCTCTTGAATTTGCAGGCTGCGCAGAGCAGCAACAGTGGCTGTTATCA  
AACTTTAACTTTACATTAACACACCCAGGCTTTGCCGTACCATGCTGCTGACTTAGGCTGGCCATCAGCCCAACCCGCTTAGGTTGCTTTGCTCT  
ACTGGCCGACCTGGCTTATATTTATCTATCACCCGCAACGCAAGCAGGTGGCCATTTGACATTAACCTTTTGAACCTTAACTTTTGGCTAGCCATATCAC  
TTTTCGGCCACATAGTGTATTTTAACTGCTACCAAAATGACTCCCTTGTATCACTGCTGCCCTTACTGTTGCGAAAAGGCAAAATACAGATAAGCTGCA  
GCTCAGTCTATGGTAGTGAAGTTAACGCTGCTCACCCCACTCAAGTCTCGGATAAAAAACCAAGGCAACACCCCTTGGTGGCCAGATATAGGTC  
TCTGGAGATGTCCTTTCTGCAACAGCAGCACTGATGCGGTTATTTACTGTTAGGTAAGTGTGGTTAAGTGGCTTTTGTGGGCTTTCTCGGTTACT  
CCACCACAACACAGCAGATGCAATCTGTTTACCACACAGACAATAATTTAGTGTTCATGCTACATAGTTCCTGGCATATTTACCAGCTCTAGACGCTCCCTT  
CAGCCCTTCCAACACCCAGCAACAGGCAACCCCACTTAAATACACTACAACCTTCTCATCGTCCAGCGCCAAAATGTCACCACTTCTTAAGA  
GTCAACAAGTGGGGAAATATCTTCAGAAGCCCAACCGCTTTCCAGCCGAGTGTGTCCTTGCACATCTTAATAGATCGCGGCATGACAGCGGAG  
GGGGGGAGGGTCTGGGGGGGGGAAATGCTCTTTTGGCTGGGCGTACTGTTTTAGGTAAGTGTGGTTAAGTGGCTTTTGTGGGCTTTCTCGGTTACT  
CTTTGAGGCTTTTCACTCCATCTGACAGAAAATGCTCCATTTCAAAGCAGGAAGAGCTCGGTCTTCTGCGAGCCACGGGAGAATAGGCACATCAGCC  
ATTTCAAGCGGATGATGAACTCCCAAAAAGTTTATTTAAGAGAGGTCGAAAGCAAAAGGCATTAAGAGCTGACAGGCACTGGACAGGAGTTTATAAATCTG  
GCCCCATTTGCTCCGTTGGAGGGGGTGCCTCAGCAGGCTGAAATGGGCTTTCTTAGAGTGCACGACGGGGCCAGACAACAGCATGTTAAAGGAAAGGGTG  
CTCGCCCCCTCCGAGCGGGGCAAGATCTGAGCCTCTCCCTTTTCAATGGGCATGCACTGGGCGGCAATTAAGTGGCTTCCAGAAAATGCAAACTTTGTAAGT  
ACTGCCGCCCCACCTCCGTCACAGGATATTTTGGCACCATAATGCTACAATACCCCAAGACCATGCAAAAGGGGCCATGTACTGGAACATGAAAA  
GATGCAAAACCTTTCAGTGTGCTTGGAGCCAGTTCTTTGGGACACTACAATAAATGTCGCAAACTATGACCTGCCATAAAATCTTGGATTAAGTGA  
GAGTGTGACATGGTTTTTACGCGGCTAGCGTTTCACTGTCGCTAGGCTGCTGTTGCTGACGCTATAGCCCAATTAACACTGGCCTGCGGCTG  
CAGACTACATTTTATTAACCTGACTTGGAGGTTGTTTTTATTAATACAGAGTTACTTCCAGAAAATGCAAACTTTTGTCAAAA  
GAGAATTTTCCCAACATTCACAAGTCTGAAGAGATTGCTGGCTTTGTAATTAAGCACTAGAATAGAGCAGATCTTCGTGCTGCGTTCTCAGAAG  
GCATTTCTGCTGTGTGGGGTGTCTTCAACTGGGTCTTTACTGTTAATCATCTCCCTCTTTCAACTTTCAGTGTTTTCAAGTGAATATGAGTGTAGCT  
TTGGTTGGATGAGCTTAGAGACAACCAATAGGTGTAGTTGCTCCTGAGTATTTGGCGGATTTGGCCGATTTGAGGCACTTACCTAAATGCGTTTATGGGTGTATCCGAACA  
AGGTGGCTTATGCTTTCATGGAATGGTTATGGGGTGGAGTGCCTGGGACTGCCCTGTTACTAGTATGGGAGCAGTTTTTTTTGTTTCCCTCAGCGGTAGG  
AGAGTTTATATTAATGAGCAGAGTGGTAGCAAGGTTGTGGGGAAAGTATAGGTTTCTTATTAACAATCTTATTTAGGGGATTTTTCGAGTTGAGCGTGAC  
TTCTAGATTTTTTAACTTTGGGCTGCGGATGATTTGACTAACCCAAAGTGGAGGATAAAGAGTTTGGTGCATGTGGAGGTTGATGATACAGTGCATATTTTCA  
TTCCAGATTTGGTTTTGGAATCATTTGTTGTTTCAGAGAAATAATATAGGCCACCATTTGGTTGTCAGAGCATACAGGCAGGTTCTCGGGTTCAAGTGTAGTTT  
TGTAGGTGAAGTATTTGTTAGGTTGCTGCTAACAACACAGGTGTGCTGGGGAGGGTGCATACCAGAGAACAGTCAAGTGTGCAGGAGCAGTTGAAGGGG  
CCTGGTATTTTGGGGTTTATATTTGTGCTGCTAGGTTTTTCCCATTTTGTATCTGTTTCTACATTTGCTAGGGAGCGATTTCCCATTTTTTAACTAGGT  
TATGAATATCCATCTAATTAATGATGCTGGGTTTTATGTTTCTGACAAATCATTTCCATTTGCAGATGTAGGTTCTAACTATGCTGCTGTGTCTAT  
TCCTTTTATCGATCTCAGTATATATATCGTGTATGCAAGTCTGTTTACTGCTATTTGCTAAATTTGCTCTGGTGGATCATTTCTATAACAGATAGGTTGTACATGT  
ACTTCTCAGTCAATTTCCATTTTCGATTTGAGATGCACTAAAATTTGTTCTTTTGTCTCTTTTGTTCACCAAGCAAAACGCAGTTGGTTGACCATAACCGAGGTA  
CAGCCTCTATTGTGGGAAAGGAATATTTTCAATATAGGAAACAGATCTGGTGTGGGGAATCATTTGGTACAAGACGCAGATAAAGGAAACATTTTCAGATGGTA  
TATCTACTGGGGGCTGTGTGACAGGCTAGGGCAGTTTTTTGTTCCACCGGAAAGTCTGCAGGATTAGGAAAAATGTGATTTTACTGCAGAGGGCAGTGT  
ACATTAATTTGGCATTGAAAACAGTGCATAAGCCTGGGTGGGATTTAGGGTCCGCAAGTAAAGTAAAGTGTGGTATCAGTGTTTGGGAGGGTATGTTGTG  
CGTCACTTATGACAGGACAGAGAGAGGTTTCTTAGAGAGGTACACTTTCAATATTTTGTGAAATGTAAGAGACACAGCTAGACTGGTGTGGGGTG  
GAAATGATGCTTTTTTTTTATAGTTCGAGAAGTCTTTTTAAACCATTTTTTTCTGTTTTGAAATTTCTTTATTTCCATCGACCTTTCATGACTATGAGCGATG  
TCTGAATTTGAGTTATTTGTTTATTTGCTGCAGACAGAACATTTTCTTACTGGCTCAGTTTCCAGGTAGACAGTACATTTCTAGGCTTTGATGAGG  
ATAGGCAGGTTTTGATTTACTGATTTGTTGTTGATGGACCTTGTGTTCAATGAGGATTTCCAGTAACCTCTATGTAGAGACTGAAGATGAGTGGGG  
AGAGGATGTAACCTTGTGGCCTTTTGCAGGTCAGTGTCCGATGCTCGGATCTGCTCGGCACCTCTGGTCAAGCTGATGTGAGCTGGTGGGTTAGAAGTA  
TGTCTGGGTTGCTTTTAGGCCTCTTGTTCAGAGGAGAATGCTGGCATTTCCGGCTTTGGACTGCCCCAAGGGCTGGCCAAAGACTATGTTTGGATAT  
TTCTCTCTGTGAAAGAGAGATGTGACTAAAATACTGGCTAAGACTCTCGAAATTTGGACTAATGGCCGTTAGGGGACTCCAGGACCCCATGTTTT  
TCGCATGAGGTAAGTGAACCAATCACATGACCATATTTGTTGAATTTCCAGGATGTTGTAAGGATGTAGATTAGGCTCTGTGGTTGATGTATCACAGG  
CTGCAGAGAGATGGAGTAGGACAGTAGATGATCACCACTGTCCAAGAGGTGAAGGGTGCATTTGATTAATTTGGGAGCTTCCCTGTGAGTTTTAAAC





AGTTAAGACTTGGTACGACTCTGAACCTGACAGCTTGAACCGTAGAGCAGAGGTGCAAGATGGAAGTGGCAGACCTAAGGCTCCACCTCCGACAACTG  
GCCTGTGCTTCTCCAAAGACAATAGACTTTCCATACGTTCCAAAGAAAAGGGTCCACATCCAGGCACGCATCTGTGTCTCCAAACAACAGGCAGAAC  
CTTTTAAAATCTGCAAGGCTAGCCAACTTTCAGCAGTCTCCACCTCACCCTCCAGACCTCTCCAGACCTCTGCAATGCATTTGGCCCTCCTTCACTGAA  
AAAACCTCAGGACATCTGAGCACTCTCTCTTCTCTCTCACCCTCTCTGATCTCCCTAGCACATATGGCTCCCATTTCTCCCTGTGCTTTCTCTCC  
TCCTTATCCCTATCACATCTGATGAGGTCACCTGGAGTGTGCGCTTTATGAAGATCTCCTGCATACAGGCTCCTCTCTTTCTCCAGAACATTAAGGA  
CGATATCGGCTCCCTTGTGATTTCTGCAATCACTCTCTTGTACTAGGTTCTTCCCTCTCTCCCTCAAGCACACTCTTGTGCGCCCCCTCTTGAAAAA  
CATCTGCGCACCTTCTGTCTTGTCTACTACTACAGCCCATCTCCATCACCCTTCCAGGAAACTCTTGGAGAAGCTGGTTCGCCCCCACTGGCCTCA  
GCATACTGAGCTTGTGGTTGCCACACGACCACTCAACCTGGATTCCAAGCATCCAGAGGCATGGAACCTGCTCTTCTGACACCCGTGAAGAACTGCTCAC  
ATCTCTCTCTTGTATTCTAATCTCCAGTTGTCTCATTTTACTTGTCTCTCTCTCTGCAATTTGGTACAGTCAACCCTCCATCTCTTAAACCGGCTCC  
ACGATACCATAGGTATCTCAGAGCGGACACTGGACTGGCTGACCTCTTCTCCACAGACTGTTTATCTTGGGCTCTTCTCTCTCTCACAGTCCACCAC  
CCGTGGCATTTTCCAGGGCTGAAACCTCTCTCCAGGCTCTTTAATCATCTACCTTGTATCCACATGTATCTCTTGGATCTTGGCCCCCACTCCGCTCCAG  
CCCCGCCACTCCAGCACTTTCATTGTTAATATATTTGCCCTTCAATCCCATGTGCCCTCCTTGCAGCCTGTGGGCTCTTTGAAACACAATTTACTTGT  
AGCGCTTACAAATGCCAATAAATTCAAATAAATAAATAGATAGGGGAGGTAAAAAGAGACTAACCAAGCACAGTAACAAGCTTAGAAGAAATATAG  
ATTGATATATGTAATCAAGATAATGACAAACCACTCTTTATCTGCAAAATATATCATATAATAGGAATGGCTTAACATGATGCTATTTACTTAAATG  
TCCCAACTTTTGTGCTTTTTCAGCATGTTTTGAGAAATCCACTGTAGCAAACTGCTTGTCTCTCAAACTCTCTTGTACCTCTCACACCTCCGCAATG  
CATGTATAACATGACCGTAAAATCTTTATGTGAATATAATTTCTCTTATGTGCTCGTCTTTAATGATTTATTTGATTTTATCCATCAAAATCTAATAAC  
ACTTATTTTGAACAAAAACAATGTAATTTGCTACGATACATTTGCCAATATCCACATAACCAGTCACTCAGCAAGGTGTAGCATAACATGGATCAGCCAGG  
CCATCTGCATCCCATGCCAAACTCCACCCAGGACATGACTGACACCCAGGAGGCTGCCGTTATFCACAGTGGCCGCTTTCGCAAACTGACACACCAC  
AGACCAGTATCCACTACTCAGTCACTCCATCGACTATGGACATGCCAGGCAGTGTGTAATAACAATGCCCAATGAGGAGCATGGCCATGCTCCACTAGGT  
GGAGGCCGCTGTAAATCGTAGCACCCTCCCTAGGAGCACAGCATCCCTCTAAATACCTCTAAATACACAGTGCACATCAACAGTCCAGTCTATAAATA  
CTACAGTACCCCAAGCTTAAAGATTTCTTCCATTACTCAAACCGGATATAGGATACTTACCCTCTGACTCACTTCTCTCCATACACCTAGAAAGCGCT  
TGATTTAGCCTGTCTTAAATGCTTTTATGTATGAACACTGCCAGAAATGGCATATAAAGATAAGCGTGGCGCTCGATTTGGATCTAGAAGCAACCCG  
ATCAATCACGCCTAGAAGATGCGATATGATAGTTTGTCCATGACGCTTGGAAACCTATTAAGGCAATCCGGCTAGTGGGCTATTAGAATCCCTCTCATG  
GACCACGGCTGCACAAACAAGTTCTATCCGAGCCTCAAGGTACGTAATAATGCACATCTTACGTGGACATCGACTGAGGCATGCGTCTGCACTCATGC  
ACCAGAATGCAGCAATGACAAATTAATAATTCGGTCTAATCGGTCACATAAAGTCTTGTCCGACTTACACCTGACTAAGCCCAACACCTCGCCATATAGT  
CCATTTGACAACCTATGACAAAATTCGTTACAGCTGGACACATAAAGTCTCTTGTCTCTCAAACTCTCTTGTACCTCTCACACCTCCGCAATGCACTG  
GATCTCTGGGGTGTATAAAGTAGCCAGCCAGCCCTTAATGCATTTATCTTGGCCAAAATGTGCACACATAATCTAAACCTCTCTCATCTGATTTTATTT  
TCAGTTACTTTAGATCCACAGCCTCATTAATCTCTTCAATTAATTTAGGGGATTTAAAGAAAACCTTGTCTAAATGTTTCCACCATGATAAAATTCGAATTAAT  
ACAGATCCAGGAAAGATTTCTAATGATTAACCTCAACTGAAAATATAGTGTATCAAACTCACTGGTCTTAACTCTTTTGTAAACAATTAATCAAAAT  
AATTAATAAATAATGGTAACTCTTTTAAATGTAGATGTGGTTTTTATGATTTATAGCAAACTTCTTGTGTGAACATCACTTGTATAACTTCTCAGTT  
CCATTTATGATTTGAATACTCATTTAGTAGCTGTTACGTTGAATATTTGTTGATTACTAGTTTTATCAAAATTTGATGCACTGCAAGAATATGAGCAAAAT  
GTTGCAATATTTTCAAAGATTTGGTGTGGTAAGATCTAATCAATTTCTGTTTCAATACTAATTTGACTGCTGGAATGTTTCTTTTTGTTGAGTTAGCATA  
GAGATAAATGTGCTAAACAGGAAATGTAGACGCATGTATGGTTTAAAGAACTACATCTGCATACACCAAGATTTAATGTAACACTACTACTGCTTGGCA  
ATAAAAAATAATCCATATGCAAGTTTTGTATAATTTATTTATATAGCAAGGAAGATGGTGTATACTAGAAATGTAATAAATAAATCTGGGTGCAAAAAGCGATAT  
ATTAATGTGCAATGTAAGATACCTTGACAGTATAATAGAGGATTTACTGAGCATTTTGTGAGCTATATGAACGTATGACAGTAGATAAAATACACTTGGTA  
GAGTACAGTAATGTGTTGATGATAAACTTTTTCAGACTGTGCGAGGATTTTATGTTGTTGGAACACCATAGCATAAATGAGTAAATACAGCTACA  
TATGAATTAACATTAACCTAGTATTTGTCAATGTATGAAGAAAATAAATAATATAGCAAGGGTGTAGGAACAGTACAGTAAGGTGTAAGTACTACTATAC  
TATGTGAAAAACATGTGAGCAGCAGTATAATAGAATGTTTACTTAATTAATGTATCTTATCCACTGCATGTTGAAGGTATAATGTTCTAAGGTTTGGCAGG  
GTTGCATGTGAATATACATAAATACAATAGACACAACCATCAAAATATGTAATGTACAGCAGTACAAATATGCGAATGGGGTATATTGTGAGATTTGACAG  
ATGACATAAAGGTGTGGTTGAAGATGGATTAAGTATAATGTGAGATACAGTGTGTGCAATTTGTGCCACGGATGACCTTTTTTATAGATAACTTATGAGGTTA  
TTACAGCCTCTCTTGGGTGGGCAAGTGTGTGGTTTTTAATATAGCTGTCCAGTGTGGGGGCCCACTGGTTTTGCTTATAAATACTACTGTCTATATA  
ATACGAAATAGACTGATTTAGAGATGCTTTTGGCAAACTCTGCTAGTCTCTGAGTAGCTCACCTAGTCTATCTTAATCTTCCATCTCCCATGCTAAGGAC  
TACATTTACAGTTGAAGCAATTTATGTACTTTGCAAGTAATATCGAATCCATTTGATAAAGGATATTTGCAATTTATCATCTCCGAAATTTCTTTTCA  
TTTTGATTTGTGCTCAATGGGATCTTCCAATAGTTGAGTGACACAGCACTCAACATCCACATCTTAAACAGACAAGACTGATTTCTTTGTGTAACATAT  
TGTATAAATTTGCTCTAGTGTGTCCGGCCATGTGGTCCATGTCCATTTCTTGTCCAGAAATTCAGCAATGATTTTTCAGATGATATTTGTAAGTAT  
GAACTGCCCTGGCTGTGCTAAGTCCGGTAAATCTATCCACACATGAATGACGACTAGTCACTCTGTTCTGATTTAGGGCTTGTAGGATAAGGTTCTG  
GCAGCAAGTAGCGAAGAAGTCTAGTTCCAGTTTCTGCCCTCCACCTTTTGCAGTTCAGGACATTTTTCTGTCTAGCTGGAAGAAGTTTTTACATGACAGG  
AAGTCTTGAAGAAGCAGATTTGAGAAAATAAGAAAATCCACATATTTTGTCACTTCTTCTGATTAAGTTTCACTCATTAAGCAAAATGGTGCAGT  
TGTGAGCAATTTAACAATGACGCATCTGCCATAAAGGAAAGAAAATGACACATAGTGCAGCATTTACAGAGTGGAGGCTGTCTTGCCTAAGCTGAACGCAT  
GATATATAATAGTCAAGGTTTACAACCACTACTGATGCTTACCTATGGCGAGCGGATATAGATAGTGCAGTGTTTTTCAGCATGTATGCATATCTGCC  
AGTGTACACATGTTATTTTATATACATGTTATTTTATATGTCATTTGATAGTGTGCTACTGCCATTTGATAGGCTCAAAGAACTGTGGGTTGAACACCC  
TGATAGCGATCCATGAAGAGTGGATGATGAGTGTGATAGACTGTGACAGACTGGGCAAAATCAGGGACACTTTATGTTGATTTGTCACGACGCGG  
ACCCATTTTTCATGGGACTCGGCTGCATTTCTATTTGGCAGTTGTGATGPTGTGTGAGGTTGAGTAGTATTGTTGCAGATGTATGCAGGTGGGTGACTT  
TGCCCCAGGAAGGATACAGCTGTTTCCATTTGTGACTGGGTGCTATACGTACCAAGCTAATCTAGTTGCCATGGGTTTATGCAGATCGAAAA  
ACATACATATTGACTGGAATCCATTTCTCAGGGACTAATCAGGTGCTTCCACCTTCTTGTCTGGGGTGGACGTTCACTTAGGATGATGACTAGGGCAGT  
AAGATGCAGAAGGGAACAGCCAGGCTTTGAGAGACTTCCGAAAAGCAAAGTAATACTCTATATGGCAGATGCTAAATGGAATCGAGTTCCAGATAGTGGGA  
GCTTAGACGGAAAGGAGAACCCTCTATTTCTGCTGATTTTGCATAAAGGGGTGACGAGGCAGAGACTTTGCTGATCTCCGTTTCTGATGGCAATTA  
GGGTGTGAGTTTGTGTCAGATATTTCTGGTCCAGTGGTGTGCACTGCTCGGTGGGTGATGCACATTTGCCTTGAAGGTGGATGGTCCGCCGATCCGCGAGC  
AATGAAGACACCGGTTGGTGGTTGTAATGTGGCCTTCTGCTCAGAGTCTTGTACTCTGTTAGAGTTTTCAAAGTGTGAAGCGGAGGCCACCCAGGATGAGG  
TTTTAGCGTAGTCTAAACATGAGAGGACGAAAGCCAGGATCGCGGTGACTCTGTGTGGGAAGGTCAGATAGGGGAAGATGTGTCAGAGTGTGTAAGTGTAG  
GTAGCATGTTTTTGTACCAGAAATGATATCTTATAGTGTGAGTCTGAGTCCATAGTTATGCAATGATTTGTACTGTGTTGGAGGTGAGGGGATGGACC  
TACAGAGCTAAGGGCTCCGGTAGCCATCGTTCAAAGTGGGGAAATGAGAGCTGACCCGACTGGGGCAGTAGGGGATAGGGAAGCAAGTAGGGAATCTT  
CAGCTGCAAGTTACTTCTCCATAGAGATGAGTGGTGGGCTTGGGGCTCCAGAAAGGATGGAGGCTACGCTACGCTAGGATGAGGATGAGTGGCTG  
CATAGTCCATCCAGACTATATGTTGAGGCGGAAGAAGGTCATCAGTTCAAGGGAGGTGAAGATTCATCCAGGGTGTGGCTGTAGAGTTGTTAGGTCCT  
GATACTAGTTGTGTCAGATGTAGGGATCCATCCAGGTTGTCCAGAAGGATCAATTTATTTTTTATTTTATTTTGTACATTTGATAGCGCGCTAAACCAAAG  
GCATCGAAGCACTGTTACATGACCACTTACTACTAATCATGTCTATGGTGTGTGGGGCATCAAAACAAATTTTGAACCCCTAGCATCTGTGAGGGA  
GGTTGAGAGACCAAGATGAAGAGTGTGTAAGATTTCTGCAAGAGCTGTTGTAGCCAGAGGTCGATTAATAAATCAGGAAGCTGTGAGTGTGTGG  
GGGTGAGGAGGCAATTTTCTAGGAGAGATTTGCAGTCTGAGTTGTAGCCTTGTACTCTGTGTGCGAAATGGAGAGGTAGGATTTGTATAGGCTAGCAATG  
CCACCCTGCTTGGCGTTGTATAAATAGTGAATGTGTTTACTGTGCTGTGTTTGTGCTGCTTATGTAAGGACACCTTCACTACCCACAGTTGGGAACA  
TAAFGCACACTTTCAATCAGTATGATAGCTGCTCTGTTTACTATGACACCTTATACAAATGATGCAGTGTAAACAGCTGTGTGAGCAGTTT  
GCCTAACCAAAACAGTGCATATTTACATTTCTGAGTGTGCTCACTTGTACTAAACACAAATACAAACATTCAGATTTTACTGATTTGTGTTCTATCTGCC  
TACAGTCTGCACAGGAAACAAACAGCACAGTGGTTACAGTCTTCTGCTACGTTGCCCGAGTAGGCAATGTATAGCTAGCAGTGCAGTATTTGTGGTCTG



CCATTTGAATACCAGCTACATTACACTATAACAGAAGATTTTTTCTCATTTTGTGTTACTTCTGTTTCGTTTCCCATCTTCATGTTGTTACTGGGGAAGATG  
ATGTACCTTAGTTTCTTTTACTGTTTCATTATACAAAGTACCTCATAAATTCATGTAGTATGCAATAGTGGTGAAGGTGTCCATGAAGTTTGGCTTAATTTGTTT  
ACAATTAATTAACAGCAAGTAACAATAGAAAGAAATTTCTCCCACTAACTCAGAACTCGAGCCAAAGAAAGTGGAGCTGAGATAGGTTCTCTATAATTAAGT  
ATATTTCTTCGAAACACTGGACACACTAAAATAAATGGGAGCTATAGGCTCTGATGAGTAAAAGCAAAGAGAGAATAAATGATCACCATACTGGCCTA  
TGGTTTTGAAAGGTGGTTGCTCATCAGAAATGGTCTACAAGGGGTTTCACGTGCTATTTTTTCTTAGGTTTTTTTTCATCTTTGGATTTTTTATTGTTTGAACCT  
TAAACAGGCAAAGACCTCTGTACACTATCATTGTGTATTCCATTTACATACCTCGTAATTTTAAATGCTGCTTTTTAGTTTGGCTATTAGGATGTGCT  
TAAGTGCCACCAATAGAGAAACCGATTGCATTGGCGAACAAATAGGAGGTTAGGAATGTGATGAGGCACACAAACCTGTCCACATTTGTTTGGTTATT  
TACCACCCCACTTACCCTTTGGCAATGCTAATACCTATGGTCATACCACCACTACCCCTCCCAACCAAACTCTCTTGAAGCTAGCTCTATCA  
CACAGTAGCTTCAACTGTATGATGATAGTCTTCTGAGAGTTAATTACCACCTGTAACGGGCTCTTGGTGTATAGAAATGTCTTAAAGTGTGATTCAGAC  
ATTTAAGTTATAATCAATAGATCGGTCTCACATTGAATGCATACATCTCTATAAAAAACAAGCATTAGCAAAGCCAACACTTTTGGCATGTCTATAGGTA  
TGGGTAGGCATTTCCAGGCATGCATCATACGCCACCGGCTCGACCAATTTTACAGCTGTGCCAGTTTATATCCAGGTAGTCCCATTTATGCACTG  
CCTGCTGGAAAATTCCTATCCAACCTGCACACAAGTTAAAACGTTGCCAGTGTGTTTGTGTTTCCATAGTAAACGACACCTGATGAAAA  
GTTGCAAAATGAAACGCCACACCAGGGATTTTTGTACCAATGAAAGTACATGTACCCAAAGACTTGAACATCTGCTGATTTCTAGACCAATAGACTACACAA  
ATATGGGTTTGTCTTTAAAGAAATGAAGAGATTTCTGGACAGTTCCAGGCACTTAAAGGCCAGGCTAGTGCCTGTGACAGGTTGGTACCTCAGGCAG  
GGCATTAGTCTGGAAACAGAGTGAATCAATAATGCTGATGAGCTTACTCCAACGGTCTTGCAGACAGGTAATGTCAATATGTAATTAAGCCATATG  
CTTCATACATAGCAGTTGCACTCAGTCTCACACCGCTGCTTCTTACATCACGTTGCAAAATGGTACCAGGTATACTGCCTTCACTCCAGCTGGTGTACA  
GCTGACCAGTTTGGTGCCTATGATGGAGAAAAAGGCAATGTGCGTACCCCTCGCTGCGAAGCCCCCAAATACCGAATAATGCTCTTCGGCTGAAGACT  
GCAGCCTCCTGCTGAGCTCTAAATGACTTTTTTCATTTCCGAGGAGGCACACAGGCTGTTTGGTATTTCAGGGGCATCACCAGGCACTCAGGCGCAGTGC  
GCTTGTGCGATTACTTGTATTAACCGCATATCAACTATTTATACAATTCATCTTTTTTCTGGCCCTTCTCCGACCGCAAATTTAAACTATGTTAAATC  
GTAATGAAACTTGTGGAGCAGGAGATGTTAGTGGGGTTCGAGGGGTGAGGACCAAGTGGCAAAACGTTGGCGAGCCGTTTGTCAATTTGTTTCCATTTACTGG  
GGTATTTTTGGGCGAGTGGAAATGACATGGCATGGTGGGCTGAGCTGATTAACAATCATTTGAGGGGTGGAAATCCATTGAGATATGTCTCTGGAGTTTGGCA  
GCCACATAATCTTCCAGCTTTGGAGCTTTGCGTCAACACATTTCCCAAAATTTCTTCTTATCTGTGCAAGTATGTAATGCAAGATAAAGTACTGAG  
CTCCACCGAATGGAAACAGCAGGTGCCATAAGCTTCCAGCCTCCGCTGTCTGCTGTAATTAATGATTTTTGCTTCTTGGGAAATAAATTTGGAGAGG  
CGAGGGGATCCAGGTTTTTTTTAAAGCCATGCTTTGATAATGCTGTTCACTATCCTCATGGTGACCCTAGTGGGAGTAGTATGATACATAAGCCCCTTGA  
CATTCGATCTCCCACTTTCTGGAAGCACCTTCTTAAAGCAGCAACCGTGTGAATAAAAAAATAAAAAAGACACCACTTTTGGTCTTCCACCT  
GACGATCCCTTTCTGTTGTTTTTTTTGTTTTAAATCCAACTGCTTCTTCTTAAATAAAGCATATTTGGGAATACAAAATGCATTTTTTAACTCTT  
ATAAAGTGCACACCTCTGAGACAATGCTGATGAAATATGTAAGCAATGCAAGGGCCGTTTACCATAACATCAGCAGGCTCAGCGAAGTCCCAATGGT  
TTTGGAGCTTTCCAGATGGAGGAGTGCAGAGCTTGGATGTTAAGTGCAGGCTGATGGGGTCAATTTACGCTTGCAGTCACTGCTGACCTGTGGACTATCCCG  
TTTTAAGTCTGCACTGTGCCAGGAAAGCCAACTGACTGAAATATGCAATATAAGTGAAGCATAAAAATAAAGATGTTACAGAATAAATTTACAAAA  
GGATTTTACCTAAAACACAAATATTTCCAGCATCCCATTTCTACATGTTGTTTATCTTTATGATGGCTATTGTAATGCAAGATAAAGTACTTCTCCG  
AGAGTTCCAACCTCAGAAGGCTATAGATCCTAATCCAGATAATAGACTAGATCACATAGGCAAGTCTGCAATAATATACAGTCCATGGAACAAAATTC  
CAGATAACAGACCACTTGGGTAAGAGCCCGTCTTGTAACTGGAACAGTTAACGGGCACAAGTCAGGAGTTGTGTTATAGACTTATCTATAGACTCA  
GAATTTAGCTAATAAACAGTTTCATAGAGTAATTCGGTGCATAACAGAGTCGATCCCAGAGACACACTCGATGCTAGTCCATGGAAACGCATTTGGGAA  
CAGCTTGGCCATATTTGACCAAAACCCATATGAATCAAAACAGCAATGCCACTAGTAGGGCAAAACAATGTCATTTCAAAAATACACACCCGGTATGGCAAT  
GCCATAAATGCCAGCATTTGCTCCTGTAAGGAAACGCCTTTGATTGTTTTGGCCAAAAGTCCAGCATTTGCCCTTAAAGGACACACCTGTGATATTTG  
TTGTCCCAATATTCAGAGTTTGGCCCAATAGGATACACCTGATGGCGTTGCCAACTCCAGCATTTGCCTCAATAAGGGTACTCCAGCAGCAGTAT  
CAGTTTCCAACATGGCTTCACTGAAAGGAGCTTTTGTGTGCTGATAGACACTCCAAATAATCAGCAGGTTGGAAAATTCGACCAATATGCCAATTTTACG  
AGAATGAAATGTGCTCCTTGGATGCTCAAAAAGTTTTATACGTATAAAGGTACCTGGTGAATGCATTTATGTTGGCAATTTGCTAGACATTCAGCAATGTTT  
TCTGTGCTTCCGTTACTTAAAAACCTCCACCTGTTTCTGCCATGATCTAAAGCTACTTTGGGATGGACAGGCACTGTTGAGATGCAAGAGGTGGGATTTT  
CCTCTGATGAGTGGGCTCAAAAGTCAAAATTAAGGAGCTTCCATGTAAATCCCAATGCTCTTTGGAGTGTCCCAAAAATCAGCTTAAACATTTACAAA  
AGGACTCATATTTACCGGTGCTCACAGTCCCATATTTCCATATGCTGTACACTCCAAATGATGTAAGTACTGGGCTTGGCCAACTGAGTAAACATTTCCAG  
GACCCTCTTCATATGCTTAGGTTCCAGCTTCCGCTTCAATTTACATCCATCAAAATGCTAGAAACATCTTCTTAAAGCAAGGTTCACTTTTAAATACCCAAA  
TACTGCTATTTTATACCGGAAACACCTCCATGTGAGTCTCACATGCCATGCTCTACACCATCACATGCTGCAGTCTTTCCCAATATGCGAGTATTACACA  
AACTTCTCTGAACGTTTTCAATAGCCCAAGTTCAGCCTCACAACTCAGCATAAATGCAGGAATAGAGATGTAATACAGGAGAACAGTTTCCAAATGCCA  
AGTTCAACTTCTGCTCGCGAGCTTATGGCATGGCAACATTTCCCATGATGCTGCAACATATAATGAAGTTTATGTTTATTTCTGTTCTGTTGAAATTA  
GTATTTCCGGATTTTTAAATCAGCGTCTGCAAGCCCTTAAATGTAGAGTAAAAACGAGGACTACAGTAGCATCTCCAAAAGGAATGGGACGTTTTACTTTT  
GTTTTATTTGATTTCCAAAATCTTTTTCAATTTGCCAGGTGCAGCCTCACATGGACTGTCCCGTTTTCTAAAGTTTAAAAAATATGGTCTCTATAGGAGT  
ATGGAGGTAGCCAAAATTTGGGCCAAATTACTCGACATCCCGACTTTAGCGGACCCAGTAAATCCCATTTCTCGGACCCGAGCTGGTACATCCCCAT  
TCCATTTGAGCCCAATAGGGGATGGGAAGGATGCTAAACAGCGGCCGTTTAAATGAGCGGCCCAATTTTATAGCATCTGTAATGCTGCTAGGAGTCCCGCTG  
TGCAGCTTGTGCTGGCCAGGCGTCCAGAGCGGGACCCGCTGCAGACCTCGTAATGTGGACCCCGGAATGAACGGTGCCTGCTTACCGGCACCGTTCA  
TTCCGCGGCGCCAGCCTCGTAATGAGGCCATTTGTTTTACTTTATGTTAAATTTGCTATAAACAAGGTACAGATGCAAAATCAAGTGGGGCTTTTAAAG  
CGCATATGTGCCATCTCAGTACTAATGACCGTGTGGAGCCTTTACAGAAGTTGCAATTTTATGAAAATAGGATCAATCCACACATCATTAACATATG  
TTGTGGTGTCTGCTGCAGCGCGCTATTACAAAAGCACTGCTTAAACATAAAGATTTTGGGGAACATAGAAAATGGGCGCAGTTACCTGTGCTCAGCCC  
CACACACCTACCTGACCACCACTGCCCTCCGTTGGCGCTTAATAATGTAGTATGTAATTTTAAACAGTACTCGTCAATAGTTTGCAGCACATCGCCCT  
TACATTAATGTGCTCTTTGTAAGTCACTGCTTTCTTATATATATTTTTCTGTTGATTTGGCCCTGGTATATGTCACACTTTTCTACACCTTCATAGACAG  
GCTCACCACCTTGTCTCACTTTTTGCTATGGTACAGCACCCCTGCATCTGTAACAGTGTACTCTGTAAAACATTTCTGTTCTAAATGATATCGCTGTCT  
CAATAAATACAGATACCAATACAAATGAAAGATGCTGAGGTGAGAGCTTGGGACATTTTATGACGCTTCTCTGGGCACTTTACCATCATTTTGGCAAAA  
GTGTGGGGGGAGCTTAAACTCTCACAAAGACTATGATCAGCGTCAATCTGCAAAAGTGCATTTAACTACCAACTAGATGTGCAGAACTTTTCCAGCAACAA  
ACTAACACACCATGTTGCACCTCAGAAATGGATCATGGTCTTTGCACTGTGCAATGTGTTCTCGATCGGGAGCTTGAATTTGGACCAATTTGCTGTC  
CATCTGTTTGGAGCTGGTAAACCCCTGGCATGATTCTGTGAAGCTTTGAACAAATGCGGTTCCGCAAGATAGGCACTAGGGCTCATAAACAGTGTGCCA  
GTCCGGTAAAAACAGTGTGTTAAGCTGCCGGCACTGTTGTTCCGACTGGAACACTACAAGTCTGCGGGGGATACCGTCTGCCACCTGCCAGATTGA  
GAAATGGCAGACTTTCAGGAAAGCAGTGGCAGCTGTATTAATGGTGGCGCTTCCCGTGGTCTTATGGGAATGGGATTAACAAATTTATCGGCACCTGA  
CTTTCCGGATCACCAGGACTATAATCCCTAGTGAATTTGCGCAAGCCAGGCGGCTAAATTTGCAAGTCTGGGTACTTGACCCCTGTAGATTGCAC  
AAAATGAACGCCAACTACTCGCCATGCTGGAGAAATTTGCCGAGTAAAGGCTGATCTATATCACATGTTGGTAGTCTGTGCAAAAGGCAGCCTGTATTTG  
GAATAAATTTCTCAGGCATATAAAAAGAAATTACTGGAACAATTTGACGCGTGGCTAAGGTGATACTTTGGGTTCTGTGGTTGAAGACATTTATGCAGCAA  
TGGGCAACACGATGCGCTCATTTACTCACTTGTCAATGACAGCAAAAATGACTCATGCCAAGGTTGGAATAATCCGAATGGTCTTATGTTGATGCTGGT  
GGGTAAAGATTTGGAATATAGTGGCTATGGAAAAAGTGGGACCTGAAGACAGCTAGTATCTGAAATTTTCCGGCAATACGGGACCTTCTTTGACTTTGT  
CAGAGACAGAGAAGCAACTACTTTATACCAGCTTGTGAGAGCTATACAACTTAGGGGCAACAAAGCAAGCAAGCAAGCCAGCCAAATTAGGAATGATG  
CTGTGTAATGAAACATGGTGAAGCATCGGAAGCGTACAGGTTTGTATCATGCCAGGAAGCAATGGGGAGGGGGGGAGGAGAGTTGGGTAAGGTTGTTGA  
ATGGCTATTAATGTGACATGTTGGGGTTAGGGTGGGGGGAGTGGAGGAAACGTTTAGGGTTTTGTTTACAACATATAAAACCTCATGTTTCACTGGAATGG  
GTAAGGAGATGTCGGACATACCCGTTACAAATGAACCTGACAAATTTAGACATATAAAGATTTGGTAATGATGTTGTTTTTGGGAGCATGAAATGAAAA  
TAAATCCTTTAAAAAATAATGCAAGTCCGACAAACCCCGCAGCAGCAGGCTTACCAGCGGACTTGTAAATGTGGCCCTATGCGTGTATACACAG  
ATCTCACAGACAATATAGTTGAGGGGACTGGGATTTGCAACAGACTCTAAATGAATATGTAGGAGTTAAGCAGGTGTCACACTCTGCATTTTCAATTTGGCT

CCCTAACACCAGGGGGTTGGGCGAGAAGTGGCGTCGTGAGAGGAGGCCFCAAGAAGCCATGATTTCCACACATAAGGGAATATTTATCTTGACCTCTTTGA  
AGAGGTAATGATACATACTGTAGGCTGGGTGCACAGTGGCCCTGCCGAACCGAGTATACCGGGTTAGGCTGTGCTCTCCATGCCAGCAAGTGATTTGT  
GGGCTATCAGAGGCTCAATGGTGGGCAACCCCTCCCTGAATGGGTGGATGATCATGCCCCTCAACCCACACATATATAAAAAAATGAATGAAGGATGACTTT  
GCACAGAAGTGGCTAATAGTAAGATCTCTCCATGGTGTGGTACAGGTATGCTTAATTCGAGCCATCTCCATGACATGGCAGTGGAAACTTGGGAATA  
CATACACTGTAATGTGTGTCAGTAGTTAGGTTFCAGGTGATCATATGGAATCATAGATGGACTGGGGAGTAGGACGAAAAGCCAACAGAAAAGCCGCC  
TCTAAAAGCAGAGGGGGCTCGACCAATGAAAATCATATCAGGTTACAGCCCCAGTCTGGCAATACCATCGCTGCTTGTGTGACTATAGAGCTGTACTGATAA  
ATCTCTAAATTTACCTGACTCTCCCTTCTACTTCTAGTAAACCGGCTGGACGAAAGTTTCAGATGTTGAGTCAGAGCCAGACTTGGCCCTTGAACCGCAAGC  
AGCGACCGACCGCACCACCTTCACTGCTGAGCAGTGGAGGAGTTGGAGAAGGCCCTTGGAGAGACGCACTACCCAGATATCTACACCCGTGAAGAGTTG  
GCCAGAGAACCAGCTCACCCAGGCGAGAGTACAGGTATAAAGCTTTAAAGTGTACGGATCCACCTTTGTTTATAATACGATTTGACCATGCTTTCTC  
AACTGGCAAAAGACATGCACACAACAAGTGCACCAGGCCAACCATTCACAAGCCACCATGCTAAACACTAACATCTGATCCAATTACATCCACTCACAA  
TGGCACCAGACCATGTAACCTCAAGTGCAGCAGGCCGTACCAACTCGCAATGTCATGTTCTACACACACTCCCTTATGGTTCCAGGCCATGGCAACT  
ACAACGGTAGACAAAACAGACCCAGTGAAGTACAGTGCAGGCTATGTTTACATAAAAAATAGATTTAGGCCACAAAACACACAACCTGCCTAGACCACACTC  
ACTAGACCCGACTCACAACCTGTATCCAGACACTAACCATGTAATTTTTTTGATTTGATGTTGTCACCCATCCACCCCTCGCTCAGGCACTCTCACAGA  
ATAAACAATAAGTTTACTTAGTGAATTTACTATTGACTTACCAGACACTCTCCAGGCCCTGGCCTGGGATTTGAATCAGGCCTACCCAGCTCA  
TCTTCCATTTGCTCAGCTCAACCATATCCATATGTAAGTTTCAGAACTGCCAAAAGCGCTTGTGCCGTACTGTCCCGTACAGAACTGAAACATAC  
TTCCATTAGTCTCACAAAATAGAAATGTAGCGCTTTGAAATGGCCATTTGGTGGCATAAGCGCTTTACAAAAAATAAATAACTAATTACCATGCTATG  
TTAATATGCTGCAGTGCAGGTAAGTAGTGCAGTGTCCCTGCTGATAGGCTTGTAGATTTGACATTTCTATACFAACCGTGTGGCCTGGCGCACCATATG  
CATTATTCATATGGCCATGCTTCTGATTGGCAGTGTATAATACAGTATTTTGGTGGTGCCAGGTAACATATTTGGTGTCACTGAAATAGATTTGGCAGTGA  
TGCAGGGGTTTTAAATAGCCCTGTCCCTGGTAGCTGTACAAAAGAGGCTAGTATACAGAGAAATAATGGCCAGCTGAGGAAGGGCTCCAGTGTATACTTC  
TGTAAATGACATAGATCTAGCAGTGGCAGTCTAGTATTCTGTAGTAATGATGTAGATTTGGCAGTATATTGTGCATTAATTTCTATTATAAGTTGTTAGAT  
TCGGCAGCTGCAGTGTAGTCCCATGCTGATGCTGTGAGTGGCACCCCTACACTACAGTACTCTGTGTACTTATTGTACAGTTGACACTGTACAGTGC  
AGTCTTCCAATGTAAGTAAATTTGGCAGTCTATAGTACTTCCCTAATGTCAGTGTGGATGTGGCACACACAGAGTACAGATTTCTCTGTGTC  
TGCCGTAGATTCGGTAGTGTTTAGTGCAGCATCTCTGTGGTATGGTGGTAGATTTAGCTGGGGATACCACATTTATCTTCTAGTTACATTTTTCTATTGGC  
CAATTAAGAGTTCTCGGTGTGTTGCTGACCATATATCTAACACCGTCCACCTATGAGGTAATGATTTCTCTGTAATGCCCAGTTTCTCTCTAGGGAG  
GTGACGACTGATCAATAAGGCAAAAAGAGTTACTCGGCCATTTTTTACATAGGTTAAAACACACAGATGCTCTTGAGGTGGTGGGTTGATGGAGCCAG  
GGAGTGGGTGAGCGGTGCAATCAGGTTCCCGAGTATGCATTTGGCAACAGCTGGCCCATCTAATTTGATCTTTGATCTTTGATCTTTGATCTTTGATCTTTG  
TAGAAGGAGATCTTTAAGAATATGCCATGAAAGCGGTGGGCTTCTCTGCTTCCAGAGGCGACAAAACCGCATATAAAGTAAATGCCAGTTTGTGTTTTGCA  
TGGAGTGAAGTTCTGAGGTGTGCTGTTTTGGGACCTGAGGCGAGGGAGCTAAAGCGATCAGCCAGATTCAAACATGTTGGTCCAGTGCAGTGCAGAG  
GACAGTAGATTCATGATCTCTCCGATTCACAGATGACGACTCAACTACTCAGCCATAAACAGCTGATCAATAAATAAGTGTATAGATACATGAGAA  
CTATCTCAGGCCCTTTCATATGACACACTGCTCTATGCCCAACACTCTCTAATTTAAAACCTCCATAATTTCTTCTGTGCTTAAACGGCTTTTCAGCAGTAAAA  
TGCATTTGAACCAATAAGAAAGTAGACAATTTGCACTGACTTTTTGTTAACATATTTACTGTGTTTTATATTTAAACAATCTAGTGTGGTTTCAGCAATC  
GTAGAGCAAGGTGGCGTAAACAGGCGAGGCCAATCACTGGCAGCTTTCAATCATCTCTGCCCCGGGGATTTCCACCCACAGGAATGCCAAGTTTGCCA  
CCCTATCAGCTTCAGACTCCGGCTATGCAAGTGCCTTAGCACAGGTGAGCGATGCTTGAAGGTTCAAGAAAACCTTCACTCCCTGTCTCCATAAAT  
GACTCAGACACCTTCGATACTACCTCTCTCAGTGCCATTTAGATACTTTGACGAGGACACCCGTCGCCCGGTATTTCTAACTGTAGCCACTTGCAAATCCA  
GGGCCCTCTCAGCTCCCTTCCCTGAATGCTGCTACTGCTTCCCTAACGCTCTCTATGTACAGCTCAAAGCAAACTGGCCAGAAAACCTCTATGA  
CTTACCTCAGTGTACTGAGGGTTCGAAGTGTAAAGAAAAGTAGTAGAACAATGTTTCTTTCGCTTGGCCCTTTTTTTGACACTTCAACCCTCCCC  
TCACCCCTCAGCCCTTTCATATGACACACTGCTCTATGCCCAACACTCTCTAATTTAAAACCTCCATAATTTCTTCTGTGCTTAAACGGCTTTTCAGCAGTAAAA  
TGTGCTATGGCCATATAATCCACACACTGAAGAGCTTCTGATCTCACATTTGCTTACATATATAAATAATATCACACTGGGTCTTATTATCATCATCACT  
AATTTCTTCCAGACGGGGGAAGCACAGTGCACAGACCTCAGCCCTGCCACCCCTCTCCATGCACCAGGGTGGATTTGTCAGCTGCTGATGCCAGTTTCAGCC  
TACGGACCCCGACAGCTTACCAGCTATTCCGGACAGCTTCAATGAAACCCAGGCGGCCCACTAACACATGAATCCGGTCCAGCAATGGGCTGTCTCCACA  
GGTAAGAGCATTATTCGAGGCGCACATATTTTATCTATATTTTCAATTTAAACAGATGACATGGTGTATTTACAGTGTATTTGATGTCACACAGCTTT  
GCATTTGGTAAGTGGGTACAAAGTGTGTTGTAGACTTTGTGCAGTCAAAACAGTTTATTGGCCCTATCACAGAGTTGGGCGGTAACGCTGGCACTATCTGC  
CTTACCCTCAAACCCAGCGCTTATTAGCGCCGATCAGCGGCTTGGCGATTTGGAATTTCCCACTGAGCCATTCGGGAATGCCCATTCGCAATGGG  
CTCAATGGGGAATTTACGCTCATACTGCCGGGATTTCCCGACGGCGGATGAGCGTGAATTTTTCCGGCGGATTTGCTCCCAAGCTCAGAGCTGGGAGA  
AATCCGCAAGGCTGATTTGGCGGTCCCTTAAATCCGGCGTAAACAGCGCTAACCGCGGATTTAAAGGTTACAGCCAACTGGTGAATGGGCAATACCGGCT  
TTTTATTGGTGCATAGTAGTATCAGTATATATGTTGACCACAGAATGTGCTGCCCTTATTATGGTTGCATGGTGTGCTTCCGCTTCTATGGTGGTTACT  
GTTGCCCATCCGACTCTATTGGCGGTAAGTGGCTGTCCCTAGTGGTCAATACAGCCCTGGCGTTAAGGGTTAAACGGCTCCGTAAGGTTGCGGCAAT  
CGTTAAACCTTAAACCTGATTTACGAGGTTCCCTTTCGGGACCCGCTCAAGTAGGGTGGCCGCAAGGGACCTCGGTGCTAATTTATGTTACCA  
AATTTGCGTACCTGACTTATGCGCTTCCAGTCCCATTTGAGCCCTTGGGGCGAATAAGGAATGGGGAAGGCCATGGTGAATGGGGAATACCGGCT  
CGCAACCTTGAATGGGCGGTATTTCCCATTTCCATGGCGGACTCATTACAACACCGGCACCAACCATGGTGTCAATAGCGCATGGTTTACGCGC  
GGGTTGTAATGGGGCTATGTTGTTGACTCCCAATCTTTGACTCTTTATGATGGCCCTCAATTACGATACTGGCGCTAAACCATGGGCTATTTAGCACA  
TGGTTGGTGGCGTATCGTACAGCTCGCCAAATGTTCAACGGGGAATFACCCCTTCAAAGTTGGCGGGGCGGTAATTTCCCATGGAACATTTGGCC  
CTTCCCATTTCCATTTTGGCCATAGGGCTCAATGGGACTGGGAAGGCCCTAAGTACAGTACCCGAAATTTGCGATACCCGACTTAGCACCAGGTCCT  
TTGGGGTCCCTACTTTAAACGGCTGGTCTAGACCAGCGTCTGGTCCGGTCCCGCAAAGGACCTCTGATAGTAGTAAATGGGTTAACGGCGCTGCAG  
CCTTTTACGGCGCGTAAACCATTAGCGCCAGGTTCTGTAATGAGGCCATATATCTGCATTTGTTGCAAGTGTAGTAGTGTCTCAAAGGGCTGCCTGC  
TGCAATGACACTGTACAAAACCTTAAAAAATGAGTAAATAATTTGATGTTGAGTGTGAGTGTGAGTGTGATTTCTCATAGTCTTTCAGCTTGAACCGTGT  
TCTGCAATTTGTCAGTCTTTACAATGTACACCTTATTTGCAGTCTTTTTGCAAGTTACATACCGCCAGTAGAGTGGGATGTTGGTGGTGGTGGTGGT  
CTTTATGTTGGTAAACGTTGTTTTTAGTCAATATAGTGTATGTAACCTTTTGCAGTCAATATAGGGCACACATAGTGTCTTGTAAATTTCCATTTGATGTCG  
CACAGTATTTGAGTACTTGGGTAGGTTACATCAAAATGTGTACACAGTGTGTTGTTCCCAACATTTGTCAGTCTTTATGATGTACACAATGTGAGCA  
GTCGTGAGGGTGAAGAATFACTGTTGTGCTCTTCTGATGTTGTCACCCAGAGCTGCAATTTACTGATGCTCACACACTTATTTGTTTTAGTATGGTGTGTCAC  
ACAGAGTTGCAATCTTAATGATGTCATGCAAGTGTGTCAGCCTTTGTTATGGTACATAGTGTGTTGCGCTTGTGAGGTGAGAAACCTTATAAACATTTG  
AACAAAGTATCTCAGAAACAGGGGATGTCATAGCTTCAACTAATCTTTCTAAATTTGACAGTTTGCAGAGAGTGTCTACACAAGCTCATTACAAAAGAG  
GAAATCTGAATCAACACGCTCCCTGAAGCTTAATAAAGCAGCTGGGACTGATGCTTCCACCAAGTTTTTTTTTATAAAAACACCCAGCCCTACTACTAA  
GGCCAAATGTATCTGTTTAAATAATTTCTGAAATGTTGATGAGCCCTCAAGTTCAGTAAAGTGTGTAAGGCTTAAAGCAATTTGATGTTGTTTTGTTTTG  
CTGTAGGATGTGCTCTGTTGCTCAATTTGCTCTCTTAAATCAATGCAAAAATATTTCCAGGGCCCTGCAATTTGCCAGGATGTCTTAATGTCACTCTCTG  
TCCACTCTATTCAATTTCAATAGTATGTTTTTTGTTGATATATTTTAAAAAACAGTGTATGATGATGCTCGATGGTTTACAACATTTATGTAAGGGCTGGCTATA  
ATTTCCACCTTTGAGGTGAGAAGACTTTTGAAGATGATGACTTTGGCTTTCTGACAGAGTTCGGAGGGAATAAATTTGAGAAAACCGCTAGCATTTACA  
TATTTCTTAAATTTAGATACTCCGAGCTCCAGAAGCAAGCATGGCGGTTGAAATGTGAATGTTAAGGCATCATATGTTGTTTTGTTTTGTTTTGTTTTG  
ATTGAGGCGATACGTGCATGATGTGATGTTGCATCTTACTAACCCACATTTTGGTCACTCAGGACTTTTTCCCTTTTAAATGGGCTAAGAGGATATT  
ACGAAATGAGTGTATGATCCCATGAAAGATCAAGATGATGATGATTAAGAGTAAACTCTCAATGCCCTCTGTAGATTTTTGTTAAATAGGACGAG  
TCAFGGTAATCAAGGTAAACACTCCCAATTTGCTTACTTTCTAAGCTTTACCTAATGAGATTTCTTAGGGCTGACTGTCTAAATACAGTATCCGCA  
GCACAATCAAGAACTCTCATTAGACCTATGAAGGAAGGACGCTCCGATGCCAGATATTACACTATAAATATCAACGTTCCCACTTAGAGCCATGCAC  
AAATGGTGCAGGAGTCTCGGGTGGCAATGTTGAGAGATGGACCATTATAGTGTACTAATAGTTTGGTTATGGATGGAAGAAAGACCTACATTTCT



GTATGTTGAACTTATTAC AAGGGAAGTTATGTTATTAGGATTTGTATAGTGCACCAGTGCCATTTGCATGGTCTGCAGGCGGTCCGGTGGATCTGTAAGGG  
AGTAGGTGAGTCTGGTTAGTTGGAAGGCGAGGGAAGGCAAGATGGTAGTGCTTTGGGTTGAGGTTGCAGATCGGAAGTACCCTCAGCTCAGCGTCTGTGT  
AAGCTTCTAGGTGTGAAGGTGAGGAGCATGGCCAGCGTTGTACCCAGGGATGCCTTGGTGGTAGCATGGGAATGTGTGGTGACATTTGGAAAT  
GTTTGAAGTATGCCGAGAGGATCTTTTCTTAAAGCTGTGTGCAAGTGGCTGATTAATATATGTGTTTGGCGAGTAAGTGGAGACAAATGAGGGTTAGT  
CAAAGGTGGGACGTGTTCTTTGGGTTTATGATGGGCTTTCAAATATTTGGTCTTGCAGTCCGTTGCATTTATGGTGGATGTGTTGGATTTAATGGTTGA  
TGCATAAAGATGCCCTGTGTGAGGTTTGGCTATTCTGGGAGACAGGGAATGCGTCACTTAAAGGTGTTTGCAGTGCCTTGATATGATGTCTGCCAGTCTGT  
TTTAGTTTTCTGAGTGCCATGCAATGTGTTCTAGGCAGAAGGTCGGTGGGGGAATGGAGTCAAGTTTTCTGTTCCTTAGGTTGTGTCTGTGATGAAAG  
TCATACTATTGAGGAGAGTTAGATTTTGTGCTTGTATGTGTAGGTTCAACTTTCTTTCTGTATAAAGTTGAAAAGCACATTTTATAGGTTTTCTGAAAT  
TTCACGTGGTTTTTTAGGGTGCAGACTTCCGCTGATAGTGTGTTTCACTGTTTGGCCACCATAGTGGATAAGGCAGAGCGTCCACGCTTTCTCTGCAAG  
TCTTGTGTTCTAGAAGCTATGTTGTTCTCGATCTTTGGTCTCCGGTGGTTTATAGTCTGATTTTCTTTTGAAGGAATCTACTCTTTGGCCTTCAATTGC  
TCTGTGGGTAATGCAGAGGACCTTAAACTGGATCCCTTTGTATTGGTATTGGTAGTGGAGTCTCTGAGAGCCAGTGTATGTGTTACCTGTTGAGTCTGTGTAGG  
AGTCTGTATTTTGGATCATTTGAAGTTTCTTTGTGAGGTAGTCCAGCATTTCTAGGTGCAAGAGGTCAGGAATGAGGGTCCAGCAAAAATGGAATGGGTGTC  
CTTTTCTCCTCTTTATGCCATACGACATTACTCAGATATTACACCTCATTTCCACCAGGAGAGTGTGAAAGAGAACGATTTGTGTTAATCCAACACAA  
CGTTTTGAAAATAGGGTCACTAGGTGATTTGAAAATTTGAAAACCTACTGTTCAACTCAAAAATGATAAGCTGCAATATTTATCCCTTTAACCCGACTCTC  
CTCTCTGTGCTCCCTCTTTGTTTTCAGTTTACTGTCTTTTCTCCATCTTCAACGCCCTGTCACTTCTCTCCCTCACTTTTGAAGGTAGGTTGGCTGCACAC  
CCTTCCATGTGGTGGGAGCCACTGGGAAACGAAATCTCTAAGACTTCTAGTAAGCACATATAATCACAAGTCTCTGTAAGATACACAGTCCACATGCATA  
ATGGAACTAGGACAGTACGGCAGGACGATTTGGACTGATGAAAGGGGAGGTTGGACAAGCACCTATTTCTTATGTTTCCAAGTTTTGTATCTTTTAGAA  
TCACCACCTTAATCATGTCCGAGCACTTTTCTGGAACCTGGTGTTTTGTGACCTTCCGAGGTGCATCCAGACTGTAGTCTGGGGGGAGGAGGGGGAGGA  
AAAGTGACAGGGGTGTAGAGATGGAGGAAAGACAGTCAAACGAAACGAGGGAGACAGGAGAGGAGGTCAGGTTAAAGGGATAAGGATGATTTTGG  
GGATCGTTTGGTCAATGATGATGATCCAGCCAAAGTGGATCATGGATCTGAAGTACAGAGAAATAGAGAACTTAAATTTCAAAGGCTTTTGAAGGAGA  
AGGGAGTAGTTACTGAAGGAGTGTGATTTAAAAATATATATACCATATGATGTTAGTGTGTGGTGTATGACGAACTGAGATCTGTCCCAACAAAC  
CTCTTTGAAGCATGGAGCTTTAAATGAAATACCATGGGATACAAATCTATAATGTTAGTGTGCAACAATAATGCTGAAGTCTCATGAGGTTCCAAACAG  
ATTTGTGATGCAGGAGAAAGGGTATCATGCTATGTTTGTGGTAAATGCCCTAAAGACAATGCATTTGGGGTGGGGTATATGTTGAGATTTATATGTTG  
CATTTGTTTACATTCAGAGGGGTAGCACTTGTTTTCGCCATCTACTTTAGCAAGATATCAGCAGAGATAAAAAAGAAATGCAAGTGTGTAAGTACAGGCTAG  
GCATTAAGGTCACCTGCTCTATTTCTGCACATGCACATAGCACATGATTTCTAACTCACTTAGTCAATAAACACTTGCCAAATGAGTGTAGTGTAGTGGAT  
ATTTTGAAGCCCTGATTTCACTGTCAACCCGGTTTCACTGTTTCTGTTAAGTTAGTGTGTTTCTGACTGTGCAGTCTTCACTTCCGTTGTTTGT  
GTGCTCTGGCGGTTCTGCAATGGAAGGAAGATTTGTTTTTTTTTTTTTGTAGTGGGATGAAGAGGGAAGAGCAAAGAGAGCTTTAATGTTCTGTTGGCAGCTT  
CAGTTCGGAGAAATCGGTCAGTCCGTGCTGGTCCGTTTGTGGTGGTAGCCATCATGTGTGTTGACGTATGACTGTGTATGATTTGGGTTTCAATGTTGGGT  
GTTGTGAAGTGTGTGGGTTTGTGGTGGGTAGAGGTATGGTGTGTGATGTTAGTTCAGAGTTTGGGGGAGTGTGCAGGATGGTGTAGATTTTAGTACG  
GTTAGTTAGAGCAACACTTTCTGCCCAACACTTAACCAAGTGAATAATCATTCTGCCCAACAATCCATCAAGTCCGGCACATTTCTTACCACC  
AAACAATCCATCTGAGGGCATCACATTTCCAACCCAGCAATCCATTAAGCGGATACATTTCTTACCACCAAGTCCAACAATGTGGTCTTATAT  
TTTGGCATGCTGCCGGTACATACATTAACCATTTTTCTACAACCTCTGTTTTGGCCAAAGCAATGATGTAATCTGTTTATCATTCAGTTTTAAGAAGCC  
AATGATTTTGAATCAAAGCCTCAAATGAGCACCAATTAATGTGACTAAAATGATTCGACAAGTGTGTTCTACCTTCAACAAGGCTCACTTTGCTCTAG  
TTACAGATGCTGCCTTTCTGCTTTGCAAGTCTGCCCTCGGATTCCTCATTAGTTCCTTTGTTTCACTATCAGTGGATATCTGCGAGGCTGTCCAC  
TTTTTTAGCAATGTTAAGATTTACCTTGTCTGTGTCTCAGACTGGGTTATTTCTTTCTTTTGGCTGAAGATTTAGGGATTCGTGTCAATGACGATTC  
CGTTATGTTGGTATTTCTCAGTGTGTTTGTGTTTCTACGTTTCATGTGGGCTAGAAATTTGATGACTGTTTATGTTTCGAGATATGTTATGTTCCCAA  
CTTCGCTCTGTGCGCATTCAGAGGTTTATTTCTGTAGATATTTCTGTGATGATTTCTGTGTTGTTTGTGCACTGTTAATGCATTTAATGTTGCGCAGGCTC  
CTCCACATCCATTTAGGGAGAATGTGTTCTTATTAAGATTTCTTATTTACAATCCAGGAAAAACAGTTTATCGAATTTGGATGTGTATACAACTTAGAAG  
ATAAGACTTGGTGCATGTTATCTATAAAAAAGATACACAGAGGCCAGAGTGAATTAATCTCCCGAATAGTGCATAGTCCATCGTGGAGTTTATGT  
GAAGGATAGTGAAGAATGATTTATCTGGATGCAGATCGCTCGTCAAGTCCCAACGGTTTATGTTTCAACTGGATGCAGATGCATATTTTAAAGGGG  
CATGACTGAGTTTCAAGTGGCCAGTATTTGGGTCAATTTTTTACGAAAAGGAGCATGTTTAACTGCTTCCCAAAGGCTGTTGTTGAGGTTTAAATTT  
ATGGTCTGTTCTGTAGAGGAGAGCAGTCAAAGAGTCTCTTTGGCAAGTGTGCTGATTTATTTGCTTAACTAGCACAGCTTCCCTGGCTGGAGGGG  
AGTTGGCTGACAAAAACACAGCCCTGCAACCCGGTGTCCAGAGGTAATGTGCAACAAAACGGTCTTCAAAGGGACACCAACGAGCTGCAAAAAACAGGCT  
CCACAAGACTCCAACAATGCGACTTCCGTTTGGGGTAGATGAATACATAGGCTGTTTCACTCCAGAACCTTACAAGGAGTACAGTACGAAACAAGTAGG  
CAGCGATCAGGGGTGTAGGAGATTAATGGGTCAATTCAGGACTTCCGCTGATGAGGCAATGAGGCAATGAAAGGAGGAGGAGGTTGCTTAAAGGCTCACTG  
GCACTCGGTTCTGGCGGCAATGCGCTGAAAATACGAGTGCAGGCGGATGCAGTGTAAATCCCAATTCATGGAGTCCCATGGACTCCATGAGTGGATTTG  
CCGTCATTAACCGCCACTGGCTCGGTGAGGTTGTACCATAGACCCCATTTTTAAACTCTCTAGGAAGCTATTAAGTTTACTGTGACCTGAAAAGAGG  
CACATGAGAAAAATATACCCAGGATACCCATGCATGCATTAAGGAGTTGGGATAGGTTAAAGCCGCTCATTTACCCGTTGTTACCCGGTGTAGG  
CAAGTAGGCGGGGAATAAGTCCCTTCCCATGCAACTGGCATGAGGCAATGAAAGGAGGAGGAGGAGGAGGTTGCTTAAAGGACCAACCCGAAAC  
CCCATTTCTTCAAGACAACACTGGGGCCATCTCCCTTAAACATTTGACACTGGCCCTAAATTCAGTGGTGTCTCTGCTGTGCCATGTCTGATGCTGT  
CTCAGAGGAGCCGTTTCTACTGGGCGACTCGTCTGCTGTGCTCTGCTGTGAGACGGATTCATCTTAAAGGAGCGTTCCAAATGAGACAGCTCTCTTCG  
AGAGTGGGCGGTGCAAGGAGTGTAAATAGCCAGCATTAATGAAAAACTGATGCAAACTACTGTTAAAGAGAAAAATATGTTGCAATTTACCAACCTGATA  
TGGGCAGCTCTGCCACCACCCGACCAACAAGATCTCATTAACAGGCAGAAAAAAGATTTGAAAATGGTGGTGAAGGAGCTGAAAAATGAATTTGAATGCTGCA  
TTTGTCCCAATTAACCCGCGTTACACATATTTTTTTCAGTTTTTTTTATATTTCTTAATCTCTCCATCCCTGAAAGCAGATTTGGAGCCGCTGCTGCCATTA  
CAGCGCTGAGGGAGGGGTTAAGGCTTCCCGCTCCCTGGAGAGAAAGCGGGCTCTGTTGGTGTCTGGGAGGATGCTGTGCAGGACAGGCGGCTCTATGG  
CTTAGCATGCACCGTGGAGGCGCATGCGCAGACTGCGCGCCATGCAAGAGAAATCAAAGGATTTCTTGAACAAATGTAAGTTTAACTATGACCTTACCTCTC  
TTCTCTTACCCTTAACTTCTGTACAGACCACATTTCTACTTCTCTTGTGTTGCTATTTTTATTTCTTTTCGATTAATGCTTCTCAGTTGCTGCACTTTCA  
TATATTTACGTTGTAACCCGAGTCCCTTAGACACTTCTCTGTGATATATTTTTTATTTTTTATTTTGAATGTTTCTCTTTTGTGCAATCTCACCCTTTT  
TCTATTGATTTCTCAATTTAAACAATTTCTTATAGCCATGATCACTCATTTATTTTATTTTATTTTAACTAGTTTACTGCGCTGACAGGCGAAAAATTA  
GAAATGTGCCCTTACTGCTGCAAGGTCACCTTAAACGAAACCTCTGTGTCATGCGACAAAAACCTCTCAATATCAATTAACCTATTGCTTAAACAATGAAG  
TTGGTTTCAATACATTGTATTTCAAGTACTTTACAGAAGAATCTAATGTGAAAAACAGCTCTGGCGACCCAAGTAAATACTTCTTCTGTCACTTACTCTT  
AAGGGATGGGCTTATCTGAAATGAGTTCATTTGTCATATGACACACTGTGGTGTGACAGCCTGCCAGGCTGAGGACTACAGACCACCGACCCCT  
ATGTTGACAGGCTGAAGATCGAAGCAAGAAATATGAATTTCTGTATAGTTTATCTTCAAGGTTGATGCTGTTGACTCTTAAATGATGACTCTCACTA  
GATATCCCTATCAGAGGGAAGGGGATACATATGTGTTATTTCTGTTTGTATTTGTTGAACTGCTTCAATCAAAGCCTTTAAATAGGACATTTTACAT  
ACATTAATATTTACCAAACTGAAATTTGGCACTCATTTATCGATCTCAGAAGGTTGAAAGGCTCATTTGGCTTGTGTTGATTTGAACTGCGACCAGC  
AGATCAAAACACAGATCTCAATAATGAGTGTTTAACTGTTGAGTATCTTACCAGAAAAATAGCACAGTGAAGTGTCTGTCTGCTTGTGATGAAATCAC  
AGAGCATTTGAGAAATATAACAATGATCAAGATCTCTATATTTGATAAAAACAGCTCTGTGATAAAAAAAGGTTGTATGTGTAATCAGTGAATAAATAA  
GACACACAGCTTTGATGCGTTTCAACACTACCCTAACATGAACTTTTTTGTAACTGAACCAATACATACACTCATTTGCTGCTTACGTTTTGGAA  
TTGAGGATAAAATGGCTGCAACATCAGCCACTCAATGGGGTATAAGGGCTCTTTTGTCTTCTGTTCTGGAGAAAGTTAGATGAGGGTCTGGCTCTAAAG  
AACAGGAAACAGGGCTGCGATFATGTTACAGTAATGAAGAGGCACTACCAACAGGCTGGGTTGATAACATGACAGCTCCCTAACAGCAGCACAACATA  
GAGCAAGACCAAGGCAAGCATAAAGGCAATGCGCAAGAGGCTGGCTGTCATACAGGCTCCTTACATAACAAGAGCTCCTCAGTGTGTTTGTATGAGG  
AGGTTATCACCTCCATAATGATTTGTTCTATATTTGCAACTCACTTTACATAGGAGAAAAATATGTTTGTCTTCTCTGTGGATAGACAGTAAACGT  
GTTCTACTTGCCTTATAGTATTAGAATAAATGTTAAAGATGATGATGATGTTTAAAGAAGCACCTAAACATTTCTCTTATTTCAATATACAACTAG





GATTACACATGAGGATGCAAGATACAAGATACAAGATACAAGATGAGAAGCTTTAGACAAGAGAGCCTTGTTTTTAGGGCCTTGCGGAAGGGCTCATGGGAC  
TCGATAGATCTAATCTGGTCTGGGAGTTTGTTCACAAAGAGAGCGGCCATAGTTGGGAAGCTAGATCCTCCATCAGGCACCTGCGCGGAGTGAGGGACCGT  
GATCGAGTTGGCATAGGCATGATCGACAGGCTGGAGGCTTTGTCTGGAGATCCCTTTGCAATTAGGTGTCTGGGGCCAGGCATGAATACATTTGTGGG  
TTAGGGCTAGTGTTTAAAGACAACCCCTTTCCTTGATATGTAGCCAATGTGCCTGTCTTCTGATCGTGGAGCTTAGTTCATTTGCAAGTGACAGAATTA  
GGTTTAGTGGGTACTAGAAAGTTGTTTACCTGATAGTTATGGGTCAATTTATGTCGTGTTATGGTTAGGCTTAGTTCGTGATAGTAGGGTTAGAGGTTG  
TTGGAGTCCAGTACTGTTAAGTATTCCTGACATCTGTAAGAGAGAGTTGTTGTATAACAGAGTTGAGTGTAGTTATTTGATAGTAGTGTAGGACATCCACC  
TGCACTGTCGGGTCAGATGTTCTGCTCCTACATGTTATTAACCTCACTTTATGACATGTTGACTTTATCCCTTGCGTAGACAACATGCATAGACAAG  
CAACTGGCTTAGTTGCAAGGACTCAGGCTAGCTCTATCATGGGCAAGCTAGAGTATATAATGTGATTGGAACTGGGGAATAAAGTTAAAGGAAGGCAAA  
CTATGCAGTCCCTGCCCTGCTACCTTATATTCCTCACAAGGCTATTTATCAATTTATTTGCAACATGCATGCTGATGTTGTGACTCAAAGCAAAGCAAG  
GTGAGAGAGGCTCCCATTTAGTCTTTGTGAGGAATTGGAGCATCCGACGGTGGGTGTGCGCTCACCTGGGCTTTTTGAAATTTATATGAAATTTGAATG  
ATGGTAGATCAACCTTGGAAGAGGTGTGGGGCACACAGAAGTTGGAGGTAGATGACGGGAGGCTTTGTAAGGACAGTATTTAGGTTGGCATTTGTGCA  
GATAGGTAGGACTCAGGCCCGGAAAGCATTGTGGACAATGCAGAGGGTCTTGAACCTTGATCCTTGCAACCGCTGTGAGCAGCGCTGGAGAGATGCAGTCC  
CTGTGCTTGATGCCAAGGATAAGTCTCGCGGTTTTGTTCTGGATGAGTTCAGAGGGCCCAAAGTAGAGGCAGGGAGGTTGAGAAAGCAGCTGTGTCAGTA  
GTGACGCTTGAGAAACAGCGCTCTGGAGCAGTGAAGTGTGTTGAAAGTTGGAAAGGAAGAGCACCTTCAAGGAGATGCAGCTGGTATTTGGACTT  
TTTAGAAATGTCTGAAATTTGAGTGGAGAAAGGGAGGTTGAGTCCATGATGGCCCAATTTGTTCTCGCAGGTGGGTGAGGCAAGGCCAAAGGA  
GGCCGGCCAGAGAAAGTGGAAAGTGGGAGCAGGAGTCCAAGCGAACAATCTCACTCTTACTGGCATTTTGGCAGAGGTCAATTTGCGACACACCATGACTGA  
ATTCGAGACAGTCAAGTACGAGAGAGGTTAGAGGAGGTTGCTGGGGTAGCCTGAAGGAGAGTTGCATGCCATCTGCATAACATTTGCAAGTTTCAGGTTGAAG  
GCAATCACATGTTGCCAGGCGAGCATGTAGACATTTGAAGAACAGAAAGCCACAGTGTGCTTATTCATAAAGGCCACGGGCTGTGGATTATGGAGCTGT  
AAACCCAGTGCCTGCAAGGAGAAGTGGACTGGCTTACTGCGTGTAGGAAAAGTCAAGTGGAGGTTGATCTCATTGACGTGAAAGCGCTGAAACAGAT  
GTGAGGTTCTTTACGTCACACAGTAAACCTGTTATAGCCAGGATGACTTTGGTGTGAAATGCAGAGAGACGGAGGACGAGACTGATCCCTCCAG  
ACCTCTGCACACTGAAGCCACAGATGGTTGAGTTGAAGGTGTCAACCTTGAAGGACTTTTCAGAACACCAACTGAAAGACTGTGCGCTGTCTCCGGAC  
AGTTTGCCTGTTTTCACTAACCTCAGGTCGCGCAGATTTGGTGTCCATGATGCGGATAGTAGGCGGTGAAAGACTGAGGCTGTCCGGATCTCCGATGTC  
CGATAAGGTCAGAGACACCATCAAGGAGGAAGTTTCCAGATGCTGTCCCTAGGAGTGTAGAGCAATCCACAGCCGCTGGGCTAGCTCAGTGGTACTGGT  
CCCTAAAAGACAGTGTGGGAGACTGAAAGTTCGCTTTTGTCTGGAACACAGAGCTCTCAATTTCTGCCATGAAGACAGATGCTCACCCTTCTCCGGC  
AGATAAGCTAATTTGACAAGCTCAGCGGTGCCAAGTACATGAGTACTTAGACCCCAAGGAGGATTTGGCAGGTGGCTGTACAGATGGAGCGAGAG  
AGAGGTCAGACTTCTCAACCCAGGACATTTACGATGACTGTGATTTCCCTTTGGATTGAAGAATGCCAATTTCAAGTGGATTTAGGTTAACCGGTTAGT  
TGGTCTGGAAAGCTTTAGTGTACCTATTTAGATGGCATTTGCTGTGTTCACTCACCTGGGAGGATCACTTATCCACCTGAAACAAGTGCCTCAAGCAC  
TGCAGAATGCAGGTTCACTATCAAGGCCACAAGTGGCGAGGCGACATGTCTTACCTAGGCCACCTGGTCAAGTGGAGATCCGAAACAACCTTTGAGG  
AAAGGTACAGGCTGTGAAGGATTTGGTGTATCTCACCACACAGACAGATGAGAGCCTTCTAGGTTCTCACCTGGTACTGCGGTTATTTATCAAGGGAT  
ATGGGACCATTTGCCATGCCCTGAATGATGTAACCTTCCAAGAAGATGCCGAAGAGGTAACCTGGAACCCCGCCTGTCAAACTCTCTTCATGATTTATAG  
AATGGATTGTGCAGGGCCAGTTCTCAAAGTGCAGACTATGGTCAAGGAGTTCAATTTCCAGACTGACTTTAGAGCAGTGTAGTGCACCTGAACTCTCA  
AGGTGAGACCACTGTTACCTACATTTAGCAGGTTGATTTGGACAAAAGGGGAAAGAACTGGGCGGTTGCATGGCCAAAAGAGCGTGAACCTTACATC  
TTTTGGTGCACACTTTTACAATCCAGACAGACCATGCAAGGGAAGAATCTAAGCTTCTGCATTTGGCCATATCCCTACAGGATTAGATTTGACATCCAGCA  
CAAGCCAGGCTCCCTGCATGGAAATGCAGATGACCTCAGCTGGACAGTCCCTTTTATCATTTGGTAATAATTTGATTTTCACTGTGTTGCAACTAACCAACG  
ATCCACAACCTTTGGAGATAAGCCTGCCTTCCGTCACGTTACCAAAATTTGACAATGAGGTTTAAATTTGCTTGGTTTCCAATCTGTTCCAGATCCC  
TTCTGGTGTACTAGAGTGTGGGGCTGATTTATGGTTTACAACCTGATATTTATCCCTGGAACACTGGCGCCCGAAGTTGATTTGGTCAAGCTCCCTTCCA  
AACFGAATTTGTAATTTGATATTTGAACAATGCGGGCAGGCTTTGTATCTGGGCAAGATAAAGCTGAAAGCAAACTGAACTGAACTTTGTTGAAACCCCT  
TAGTAAGCCAAAGTCAAAAATAACATCGTAATTTAGCACTAGTCACTTTTAGATATTAACCTGTAAAGTGGCAGTTACGCTGTGCATATAGCCATATAGGAG  
TTGGCTGTCTAGATGCATAGACTAATTTGGATCGACAGGTCGATTGGCTCTGCAGGAGGAGATGGCTCTCCTGTTGAACACTTTCAATCGGCTAAC  
AGGCAAGATCTGCAATGTATACACAATTTAGAAACATCTGAAGCAATGAAAATGACTTTAGCAAAAGACTGTAAAAGTTATTTGATAACTACACACCCACGT  
ATATGGTTATGTACACTTTTATAATTTTAAATTTTAAATTTTAAATTTTAAATTTTAAATTTTAAATTTTAAATTTTAAATTTTAAATTTTAAATTTTAAAT  
GTCTCACTGCCAAGAAAAGCTCTTCTACTTTGCAAGGTTTCTGAGCTAAGTCTCTGTTTTTCAAGGCTTGCCAAAATCCATCCTCCTGATCATCCACTTGGGGC  
CCACCTAACAAAACGTTGTGAGACAGAGACTTCCATACGGTCCATCTCATAGGAACCTTGACGCACTGTCTTGGCGGAGCTTGGCATCATAACTCAGGAGG  
CGTGGCCACAAGGAGTGCAGACAAGTGGCATTAAGGAACCTGGTATTTGAAATATAGGTTCCCTGCAAGATAGCAGATGATAGTGTACCTGTTTCT  
GAGAACCATGACCACAGTACCTTCCATTTGAGCACAACTGTCATCAAGGACAGTCCATGATATTTAGTATCAGCAAGCATCGCTGCTTTGTCAAATCTCA  
GGAGAATCGGAAGAACACTAAAAGCAGCTTACTAATCTACTGCAGACTCTGAGCTCTGCATCCTCGCAATTTGTGAGGTAGAAACCCCTGGAACAAGACATTA  
TGTGTACCAGGCTGTTCTGCTACTGCCACTATGGCTGGGTTGATGTTGCTCCTGCTGGGGCGGTTGAACCTGCCATGCGCCATCATATTTCCCTGGC  
ACCTTGAACCTTTGCTAAGTCTACTTATGCCAATGCAAGAAAACCTGTGAGCTCTTCCGACACCATGATACCTTCAGGAGGCAACATTTGATGCTAA  
TTAGTCAACATTTGTAAGTATTAGTCAACTGACCAAGTGAAGAACAGCAAGCAAGTCCACATATTTGATTTCCCACTGTGCAACACTACATCTAGATTA  
GCTAGACTCTGGGCCAGACTAGCAAAACTATATGAACCGCTTGTGTAAGACTCTGACCAGCTCGAACCCTGAGCAAGACTACACCAACAGGAGCAGGTA  
ACCACATAGCCACACTGAGGACACAGCATGTATTCACACACACCAATGCTATGACCAAGAAATTCATGACACCCACACCCACCCCACTTAAA  
AGGTGCTTTAATCAAGCCAGATCCATGATTTGCTCATGCCATCGAGATGCTGATCTCATCTCCGAAAACCTGACTTTTTGGCCATTAATGATGATCTG  
GCTACATACCGCTGCAGGACTGCCATCATGCTAGCTATCCCAAATGGATACACCATCTAAGATCAGATAGAAAGCCGCTGGAGGCGGCAATAGCAC  
TTATTTGCAAACTTAACCTTATCTACCAGGCTAGTCCATCTAAAGACATTAATTTCTGTGAAAGCCTTACAGCCAAAGTTAGTTATCAACACTCTCAAAC  
CTCACCATCCATTTGATTTATAGACTCCAGGCCCTATTTGAAACCTTTGAGGAGGACATTTCTACTATTTCTATCCCAATACCTAAAACCTGATCAGAGG  
TATCCTTTTAGGGACCTTATCTGGGTTTCAATGACCTFAAACCCACCCATGAAAGTGAAGTGGTAACTACTTTCTGAAACTAGGCTTCTCACAAAGAGT  
GCTTCTCCCAACCCACAACAAAGGTAGGATACGACTGGGTAGCAGACCACAACCTGCAACCGCTCTATCCTATCGATCTCCCAAACTTGACAGACCA  
CCACCTTATAACATTTGTTCTAGAACTAACAGACCTATTTCTACTATACCCAGCAAGCACCCACCCATCCCGACAAGGAACAGAAAAAATCACCCCAA  
ATAAACTACTCCCACTTATCTTCTTACTACTCAATTCATTTACAGACCAACTGGACCCCGAAACTCTAGTGAATGAATACAACAAAATTTATGCTCTGCA  
CTGGACTCAATCGCACCCTCAAATGAGACAAGCAAAACAAAGCCACCTCAATTTCTGTATACCCCTACCTGAAAACACTTTTGTACAAAAAAGGC  
AATGTGAGGTTGCATGGAACACTCAATTTCTGAAAGAAAATAAAGCATTCTGAGGAATATATCTATCTCTACAAAAGGAAATACGTGCGCTAACCG  
GAAACCTACAAAGCTAGATAGCCAAAGCCAACCTCTAGTATGAAGGAACCTTCTCATCATCTTAAAGGAAATAGAATCTCCCATCCAGTGCAGACAACCTGT  
GTCAAAGACAATAATGTTGTCACCAATTTAGCAAGGCTTTGGCAATAAAGTGAACACTTCCAAATCAAATTTGCAAAAATAAATCTCACTTAGCCTGG  
ATACCTTGGCAAAAACAACTCAACCTCTAAAATAACATTTGACACCCCTCACTTCAAGTTCTCTAAAGTATCCCAATTTAGTGAAGTAAATACTACT  
GTCACCTCAAACCTCAAATTTGCCAGGAGATCAATGTCCAGCCCACTGATAAAGGACGCGCCAGAGACTTGGCTCCCTTTTTCTCAAACCTCATGAACA  
CCTCATTTCGCAACAGGTTCTATACCAAGTAACTTAAAAGAACTTTGGGTACTCCCTGCTTAAAACACAGACCTTAGACCCAGCCATACCCATGATTAACCTC  
CCAATTACCACCGTGCATTTCTCCTAAAATCATAGATAAAATGGCGTATTTCAACAATACATAAACACCTAGAAACTAAGCACTGTGATGAGGATCGGCA  
GCTTGGCTTCCGTCCTCAGCAGCGGACGAAAACAGCACTCTTAGACCTTAAAGCAACAATCGAACGAGCTGAGGATGAGGAAACCGCTTACTCCTCC  
TTCTGGACCTATCAGGTTATTTGACCTTGTGACCATATGGTCTTTGTAGGCATTTGGACATGGCTTTCGACCTTCTCTGAAAGAGCCACAGCATGGAT  
CCTACTTTCTTAAATAATAGGACCATAGAGGTTCTTCCACACAGTGGCAGCAGCTCCATCCCACTCACATGCGGCGTGCCTTAAAGTATGCTGCTT  
CTCCACACTCTCAACAACATTTCCACAGCCCTTTTCGATGCTGGACTCTTGGTACTCTTGGTACTCTACCTACACTAATTTATGACAGATGATCAGATCTCTCTAA  
CACTTACTGGTATTTACGACAAGGATTTTGCCTTGGTGAACAGTGTGTATCTCATATCCAGGACATGGATGGCACTCAGGACTATGCTGATGACGACA  
AACTGAAATCATTTATCTTGGCACACCTCTACCTCAAACAACTGGGTCCAACATATCTTCTTTTAACTTGTATAACAATCAAATCACCACTGCTCAT





AACTTCGAAAGCTCAAAACATTGCTTTAAATGACTTTAACTGTTTCTGAATGAACTTGCGAGCAGCTGAACTCGTGCCAACTCAACTTGGGCTGGTGGCGG  
TGCAATCCGGTGTGCGAGTTAATATGATGTGGGCTGCTTCTTTCTGAGCCGAGCTGATGTTGGCAGTGAATGTGCCACATTCATGTTTTAGGACCCCTGC  
CGAGAGCTTATACAGTTGTGAATCCAGGTTCACTAGTAAACACAGATTTGGCGTATTGGGAAGGGTGGGCCGACACCAAGCCGAGAAATGGAAAGTCAG  
GCTCTGCTCAAAGTGAGTTACTTCCGCCCGCTGTGCAAAGAGTGGGTCATTAACCTGTGTCAATTTGGAGAAAGAACCCCTTTTACAATAGCTCCCCAGG  
TTGCTGGCTGTGGATAAAGCACACTTTCAATTGCTTGCCGGGCGTAAAAATATTTTCAATTTGCCACTTTAATGATGTCAATAAGGTTATGGTAAATATAA  
AGGTTTAAAAAATTTCCCTTCTTGTATGAATGACCAGTGTCAATAATGTCAGCGGATGTTTCTTGTGAGCAGGGGCTGGATTCGTGGAGAGCCTGA  
TCCCTCAATGGCATTTGCCAAGTTTCACTTAGATATAGTAAAAATGCTTACAGAGACCCTGCTAATAAGGATACCAGAAACAGTAATCCAATGATCTATGGCT  
CAGAATAAGATGGTGACATTTGTGGGAGTGGCTTTACAAATTAACCCCAAAATATTTGTGGGATTTCCCTGCTTTCTGGTGAGCCTGAGGAATTTTAACTT  
TGGGTTTCAAGGTGGAGATAGTCTGAAGCGATGGGGGCACACTGCGTGGGCACATGTCTGTTACCAATAATGATCCTGTTGTCTCGACAAGAGGCAAGC  
ACGTCAGGTGATGAAGCCCTCAAAATGGTATGGTCAGCAGGACATTCCTCTCATATTTCCCAATTTTTTGAAGGGGCTTTTCGATCATGGCCAAATATCGA  
GGGATTCAGGTGATATACCACCTCCCTATCCCAATGCTATTCACTCACATCCCGTCTACTAAGGGATACCAGAAACAGTAATCCAATGATCTATGGCT  
CGCCAGTGTCAAAAAGTTACTGCTGTTGATCCCGAATACTCATCTATTTGTTTTTGTAGCCATAAAGGGAAACAAAATACTGGTGTCCCAACAGCTCTAAT  
TTGGGGAACATCAGGATCCCATGTCTTTCTGCTTGTCTAATTTCCAAGAACATGGCAGAGGATCCTTGCAATTCCTTCCCGCTAAGTTCCAGTGATA  
TGTCATGGGATCCTGGCATCCTTCCGCTTAACTCCAGTGATAGGGACTATCGAAGTGACCCCTTCTGATCTCTTTCCAGCAGCATATGACAGTGGAT  
TGTGCCATCCCTTCAATCTCTTACTTATTTATAGGGTGCAGACTGGTGTCTTCCAATTCCAATATGACAGTAGATGCTGGATTCCTACGCTGTGTTG  
TTTTTGACACTATTTGACAGCTATCCTCAGTCTTCCAAGCAGAGATGTGCAATACATCCCTTGGTATTTTCTGCTCCAATTTCCAGGAATTTGGAACATG  
GGTCTCTTTGAGCTATGTTTTCCAGAGAGCAGGATATGACATCCTGTGCTTTCTTTGATCTTGCTTTCCAGGATAATACCAGCAAGCAAGTCTGTGT  
TGTCAAGCACCTTAACGFTCCAGATAGACTATGTCAAAATAFCTGAGATCTGTTCTGTTCTTTCTATGGATGTCATTAATCTTATCTGGTAAAGAT  
GATTTAAGAAGGTATAACGTGGCATGATATTTGGTCTGGGTTCTTCTTCTCCTGCTTCTTTACTGAAGGTGTCTTCTATTTTACAGGTGATGAGCAT  
CCTCAGCAACCTTAGTGGAGTGCAGTCCAGTCCAGGATTTCCACTCTCCCTCTGATGGTGGCTTGGACACTTCCAACTCCATCTCGGCAAGCTGCA  
GCCAGCGGAGCGACTCCCAAGTCAGTCGATAGCTCCGCCCTCGCAGTCTACTGCTCCGACCTACAGCACCACCGGCTACAGCGTGGATCTGTG  
GCCAGCTACCAATTTGGGCAAAAGTGAAGTACCGGCAAAAGTGAAGTACCTGTTCTGTGCTTTGATCATGGGAATGATAATGAGGATGCTGAATGGTGAATCTGG  
TTCTGTAAGTTCTGGAAGTGTGATAGTGCACCTGTGTTCAAAGTGTAAATATGGGAAATCAGTAGAATACGCCAACAGGTGAGGCATTTCTATACCACAGC  
GACTAAGTATGCTCCCATTTCTATTTCTCGAACAGCAGCTTGGCTCAGCCTCCTAAATAATTTGGAATTCAGGCTCCTCCTCCCTTTCAACGCTACCAAGCAT  
CTCTTAACCACTTTGCTTTCTCCAACTGGACTACTCTGCAATACCTTTCTTGGTTTTCCCAACTATGCTTTCTGCTCTTTCCGCAAGATCATTAATCT  
CGCTACAGGACTCTTCTTCAACTCCCTTACTTACACACTTACTCTGCTACCGTCCAGGCTGGATGGCTGATGAGGCAAAATAGGGAAGATTTAAATA  
TCTTCTCCTAGTTCACAAATCTATCCACGGTACGGCACCACTCTATCTATCTCCTCTATCTAACTTAAAAGCCTTCTCGTAATCTCTGCTCTGCCTCCT  
CGACTACACATTTGGCTCCTCGCACTCCTGTGCTTCTCTGCTACCGCTCTTCTCTCTCTTCTGCTGCACTTGCATGGAATTTCTTCTCCCGGTCTATCCA  
AGAAACAGACCACAGATTTCTTCAAATCAAATAAAAGCTACTTCTTGCCTCTGTGTTACACTCTTAACCTACCTCAGCTGCCTGCTAGCTACC  
ATTTCCCTTGGCTTACATGCTTTTGTAGCTCACTTCTCTGCTCCATTTAGCATCATGGTCAAGCCGAAAGCAGCAGCTGGTCTGACCCGACGCTGC  
ACTTAAAAATGTCCAATGTTGGTGTCTTACTCTATGATGTCCACTTATCTATTGTCCCTGTCTGTTCCATTTGCTCACCTCCAAACCTGGTCAGA  
ATGTACCTCAAACCTCACTTGTGAAGAGCTCACTGCTTCTGTTAAATCTGATTTTTTATCTATAAACATTTCTTTGTGATCAAAGAGCAGCTGTGCT  
CCTGTATAATAATAATAATAATAATAACTGTACTGATTTGTAAGGAATCTACTTTGCAAGTAACCACCAAGCAGGCTGGGCTCCATTTCTGGCAT  
ACATTTCTTACATTAGATATGTAACCTTATGTCTCTTAAATCCATCATCTTTCTCTATACTACATGGGAAATAGTCCCAATATGGACAGGCTGAAAG  
ATGTTGGCAGACACATGCTCATTAAGGAAAAAATAFAGGCATATGAATGGATGACGCCATGCCAGCCCAATTCACCTTGATGTCTCTGCCGGCCA  
TACCATCCTTTTCTCAGCATGGACTCAGGGGAAACAGACTTGTCTTCTTACTTCCCAAAATAGTGTTCCTTTTCTCAGTGTAAAGTCTATGCTCAG  
ACCTCGAGGGTTACATACFGGGCTCCTGCCACAGACTTTTGGGTTTTTGTATCTGCAAGTCTGTTCCATTAGTGCTCCGTCAGGAGGTTCTGCTGG  
TCCATTTTCTGACAGGTTCCACCTGACGTACCAAAATCCATGGGAATTTGGTCTTCCACCAAGCTGTGCCAGAGGACCTCAAGAAATGTTTCTGTTGAAAGA  
TGAGTACATTTTAAACAAAGCATCCGAGTGCAGACTCATTTCTACGACTCACTACATCAAAGGATTTCCCAAACTTAAATATAGTGTGCTGT  
GAGTCACAATGTACAGCTGTCTCAGGAAAGGCTTTTCACTACTATTTGAGAGCAACACTGAAGTGTGTTGAGTCTGCCACCGGCCACAAGGCTGA  
GGTGCCTGACAGTCCAATTTCTGATAGATACACCAAGGATCCTCTGGTGGATGACGGGGTCCCTCCCTCAATTTTACCAGAGGTTGACACTCA  
CAGGGATGACAGTACTGAAAATACAAATGCTGTGTCAGCCTCTGCTGACACTTAGTCCACAGCACAAAGCCTTGTGCTGCTCATCAGGGTACCA  
AACAGCAGACTGCCAGAGTCCATCAAACCTTTTCAAAGCAAAGAAAGATAAGCCCTTCAACAGGTTTAAAGCTCAAAGCCTCATGTTATGGTAGAGGTC  
ACACCAGTGTATCTGTGATGTCACCAAAACCAGACATCAGAAGCTCATCCCTCCTGGTAAAGTGTCTGCTCCCTCACAGGCTTGGAAATCAAAGCATG  
AGTGGACTGGCCCTCAAACAGCCGATAAATCATGCATTTTCCATCAAACCCCAAGCTCATACATGTTTCTGGACTTCCAATCTGAAACCTACA  
ATACATAAGTCTCACTCTAAACAAAGAAATACAGGTCATATTCATTAATCCGTTTGCATAAACATTCAAAAATGCTACAAAATGATATAATTTCAAATC  
ACTGAAACAGTGTACCTGTAATAAGATATTTATAAAATATCATCCACCATGTTATAGTTCATACTAATAAATCTTGAAGATCTGCCAGGCTCAGTA  
TTAAAAGCGTGCAGTAGACTCAGGAGTGTTTAAAGATTCATTAAGTGTGTTTAAACCCCTACATGATCTAGCAGTTTCAAATGCCGACCTT  
GCCCAAAATTTGCGAGCAGGAGTAAAGTAAATTTCAATTTTCAATATATATATCTTCTTCTGTCGAAAGAAATCGCACCCTAATTTTGGTAAAA  
CTCCTCTATTTCTAGGACATTTCCGATAATACAAAATTTAGGATAACCTGGAGAGCATCCACAGTACCACACAGTCAACGTTATATTTGTGTTTAC  
TCTGTGAGAAATTTGGTAAACAGTTTCAATCAATCACTGCCAATATATTTTAAATCTCAGAAATTTGCTCTGCGATAACCTTTTGGGAAAGTATCCGTAAT  
ATTTGTCAGCAGATTTTCCCAACACTGGGCTTGTCTCATGTGCCCCATCACTTCTCAGGGCCAGCAGGACGTTAATTTCTCAATAATCTACAATA  
AGTGTAGCTCCTTCAATGAGACCTACTTCTAGGACCATATGCTCTAGAGCAGGTGGTACCAGGCTGCACAGGCTTGCAGGCCCCTTTCCCTCC  
CACCTCTCTGAGACCTCTATGCAATGGGTCATTTATTAATGCCACTGACAATGGCCACTCTGTGCGCAATTTGTGCCACACCTCTGGTCTCTGGTC  
CTTCACTTTCCAGCAAGTGGCAGTGTACAGACTGCTGCTGACTCTCAGCATTTTTTGGCAATACTGAGGAAGACGACGATGAGGATGTCTGAAAGAGAAAG  
ATCTTCACTAGTCTATTTTTTCTACAGAGACACTCCCGATGGTTGAAGTTCATCCATAGCCTTAGCTGGATACGGGAGTCTGGGTCACAAACAT  
GTGTAGTGCAGCAGGCTACAGACTCCACTATGCCCTGTCTCTTGGCAGGGCCACTTGCCTTACCAGCAGCTTAACTTCCAGTTTATAGTCCATTAG  
CCACTGTTATAAAGCAGTTGGACTAAGGATGGCTCCTATTTCTGCTGTTGCATAACFACAAATAGACAATTAATCTTTTTTTTAAAGCACATTTGAACTCA  
TAACTGGTGTGTGCTCCAAGCTGTGATGGCTGATGTACAGTCTCCATGGCCCCGCTTTCTAGGGCTGTCCGGGTCAAGACGCTGAGTTAGTTAATCT  
GGCTTTGCTGTTTCTAGTCAATTTATGCCGTTCCATAAACTGCCACATACGAAGCTCTCAATCAAACCGCAGAAATTAATGGGTTAATGGTCAACCCAG  
TGTGGACTGCATCAGTGCCTTTAAGCAGAGATCCCAAAACACCAATTCAGCGTGCATAAAACGCTCGGCGAAAAGAAGGATTTAATTTATAATCAGTAA  
AACACATTCACAGCCCGCTAATGTGAAACATGCCAAATGCAGACCTTATTAATGAACCGAGAGTGCAGCAGCTCGGGCGCATAAGGCAACACTGGCA  
AGAGAAATCAAGTGTCTCTGAGAGACAGCCACGGGCGCCTCTCTGAACTCTGCTAGCTTAGTATAATTTGATGTTATCGATAGACTGGA  
GCTCCTAATAGTCTCCGAGTCTCGGAGTGTCTCTCTCTTCTAGCCCTCGGCAAGGCAAAATCGTCCATGTCATTTCCATGTAATGTAATGTAATG  
AAACACAGAAAGTGGGCGAGTGAATCCGATAGGCTCAGAGCTTACCAGCCTGGCACAGCTCAAGGCTTACCAGGCTGCATGGGCCCATAGAGACC  
CAGGGAGGTTTCCCGACAGGCTGGTGTCTTGAATGACAGGTAGGGCTGGGGCAGACACTATCGTGTGGTGTCCGAGAGGTTCCGGCTGCAGGGAATC  
AGAGTTTGGCCGAATTAATGGTCTCTTATTTTCACTTTTGTCTTATTTCTTACTCGGAAACGCTCCAGTTTCACTGACCCCTTGCATGACCCCTTAAAGGCA  
ATGCGTGTGGTCTAATCTAAATGATCTGTGACCATCCAGACTTAAAGAGCTTCCGGCTTCACTTCCCTTCCCTTCCCTTCCCTTCCCTTCCCTTCCCT  
CCTGACCTTGCCTGGTGCACCAAGCTGTGCAACCCCTAATTTGTTTAAAGCCTGCACCTAAATCCGAACCATCTCTGACTGCAGAAGGTATCCATATCGC  
AGAAGCTCAATCACTTAAGACTCTTCTTGTGGATGCAGAAAGCATCAATAACCCAGCAGGATCAATAGCTGCACACAGCATCAAGTACCAAGCAAC  
CTCTGTAGTGTAGAAGCATCAAGTGTAGCCACATACATAGATGCAAAAATAACAAATCAACCGAAGGCTCAGCACTGAAAGCTTCTTAGAG  
CTGCCGATGACATCTATAGACACGAAAGTGTATCAACCCAAAAAGATTTTAAATAACAAAGCAGCATGTATAGCTTATAATGCATCAATAGCGTAAATAC  
CGATATATATTGAAGCATCAATAACAACCTATTTAACAACAGGAGGACAGCATGCAGAGCACAGAACATAGCCAAAGATGACATCTGTAGACATACAAGTT

TATCAATAACTACAGACCAGAAAATGCACCAATAACTGAAGATGGCAGCTAAATCCAAAAGAAGGCATCAATAACCAAAGACAGCAGCTGTAAAGGCAGG  
CAGCAAAGATTACCGAAGACATCTACTTTAGCTGCAGACTTTATAGTAACCCGACGATGTATAACTTTAAAGAGCCATCCATGTTTCATATGAGGCATAGA  
AGCCTGATATGATGCTTGGTCGACCTTGAACCCCTTGGCCCCGTATGCTGGCCCTGGCTTTGGATGGCGAGGTCGGTCTGCTTGTGATCAAGAGTCTG  
GGGCAGATCCCAATGGCTGGTATAAGGAGCCGCCGGCCGAGCGTTAGTCACAGCAGCTGTGTTTTGGGAGAAAGAAATACATTCAGGTAGGACAACAACAT  
TTCCCGCAGTAACACCCCCCCCGAAAGCCGACCGCTCTGCAACCCGGCAGCTGCACCCGTTGGGCTTTGATGTGGTGGCCAAAGGACTGCATTGTGAC  
TTGTCAAAGGTCGACAGAGTCCAGGGAGAAGTCCGGATGCATATCTGCAGGCTACTAGGCCTGACCTTCGACCAGGAACAGTGCAGACACAAGGATCC  
TGCCTGTTCTATAAAGGGCCCTTTGAGATCAAAACAGAAAGGATATAAATACTATACCGTTTGGCTCAAACAAACCCCTCCGTACACTAAAACATTTAAATCG  
TACCTTCCCCTCCAATCCACTTTACATTTACACCCCTCTAGGAACGAGTTTTATTGACAACTCCTTTAATCGCACTGGTCTATAATCTCTGACATCAT  
GCAAGGCACGGGGTTTGCAAAATGTTTTATGCTCACCTACAAGATCATGTTACAGTCAAGTGCACATTTACATGCTGCACCTTTATATCTGACGCACA  
CACGGGTTACTTACATGTATGTCGCTGTACTCTGGATCATACGCACTCTCCAGACCCAGGTTCTTTCAAAATGACACGGGATGCCTTCAAGTTCTCT  
CTCAGATTGGCACTTCTCCAGGCCTCACCATTCGATTGCTTTTGGACTAAAATTCGCTCCAAAGCTTGAGCAGTCTCTGTACACTCAGCGGGTTCAAACATT  
GGCACTTTTGTATTCGGGGCAAAGTCGAGTGAACAGCAGGAGGACGCTCTCCCTCCCTTTTTTTTTATAGAGTGACAACGCTCTCCCTATATGTTTTCAAGG  
AATAAAAAAAGAACAAATTTTCATGTCATCTGCTTGGCGCAAAGGCTTCAAACCCAAGTCGGCGCAGCTGTGAGGCCAGACATTAACCACAAGCACAG  
GAATTGCTCATCAGCAGATGCAATGTCTTCTATTTGACAGTCTGCTATACACACATGGATTTGATACATATCTTACATGTAAGGTTGCACACATCT  
TCTTATAGGAAATCTGTTTTTGGAAATGCTTATTTACTTCACTTCAAGTATGCTGTAACGTCATTTCCCAATGTTGTTCCATGATGTCAAGATPACC  
CCCTCCAGCACCCTTTTTTAGGACTTGAGCACTATTTATACTCAGATGTTTCGAGACACTAACATGTTTTACTTCCATATCTTACCACCTAAGTTTA  
CTCTTTCACTAGCACAACCTTCCACACATCAGTTCCTCCACTCATGCGTCCCACTCCTCATTGACTTTTGTCTGTAGGCGCACTTTTCAA  
CTAACAAATGCTTACACTTATAGTACTTTTACAACCTTCCACACAGAAATGTTATAGTGTCTTACACATGGCATTTCACACAAAATTAATCTTTGACAT  
CTTCATACATTATATATTCATAATTCATATACAAAGAACTTTACACATAACACATATAGTCCCTTTACAATGAGACGCTGCACACATGGGAAATTTTGC  
ACTCATTTCCCAAATAAATCAATGCAACTGACTTCTTCTACACACAGACACTCCCAACGCTCCAAAGAACGACAACCTCTCATACTGAAACACGCATACA  
GTTACTATCAGGTTGATCAACAATGCTCTTACCATCTTTGATAGGCACTACTTGGCTCCTGGTCTCCCAACCTCTCAGCAGGCTTCGACAAAGCAGT  
CCACAAGAACTCATTTACACTTTACATGCCACATGGAGATGATGAGTCTGCTCCAGTCCCTTGGGTTCAATCTTACATTGCCAACCAAACTTCCACA  
AATGGATTTCTCCAGATCACCCACTCTACCCCTTCTGGGGAGTTCTGCAAGGATCCATCTTCTCCCTGTGATCTTCAACATTTAGATGGACTGCTTAGA  
ATCTGTGACACCACAAAACATCCACATCCACCGGTAGCAGATGACACGATGCTCTTCTCAAGATATCCCTCATCAAAGACATCCACAGGCTTAAGGC  
CTGCCTCAAAATATCCAGTCTTGGATGCTTAGTGTCTACATGAAGCTCAAGCCCGAATCTTATGCTGACCAATAACATGTTCTGACATCCAGACAGG  
GCTCTCCGCTATGAATCTTAAAGGTTTTCAAACCCAGCTGACCACTCCGCAAGTCCCTTGGGTTGACATTCAGCAGGACCTCTCCCTTCAATCAGCACA  
TAGCAAAGAAGACAAAACGGCTTGGTACCTACTTTATCTCTGCAGAAAATCAAGCCCTTCACTCTCAAAAAAATCTTCAGATCTGCTTTCAAACATT  
GTTCTCTCCCACTGGATGGTGGCAATGCACGCTTAAAGGAATTACAGAACCCACGGGACCCCTGAGAGGTTTTCTACATGCTGCAGGACAACCTCAG  
GAAAGACTCCGCATATTAACACATAAACCCTACCCTCACAGAAACCACTAGCTCTGCTTCAAGTATATGCTTCAAGTCAAACACCTTTACAGTGA  
AACTCATTAATGTATACTTTACTATATTTGCATTTGCACTTTACTACAAGTGGAAAGTTACCACACACTGGCATCTGCCACCTACCCCGAAACTCACAC  
ACATGCGCTTTCCAGTGACAACGTGTCACAAAACCTGAAAGCTTTTAAATGACATTTAGCCTCGCATACTGATACTTTGATGTTGCACTGACACTTGTG  
TCGCACTTGCCCACTTTAACTATGTCACATATTTCTCATACTAGAAATTTACACTGACACATTTGTGAAACTACTCTTTGGCAGAGATTGGTACTTTTCA  
ACTAATGCTTACACACAATGCTTCTTCTAAATGACACACAACTCCACAAAGCTGACACTTTCTTAGTGATACACTTCTTAGTGTATGATGCTGCACTTTT  
ACTGATGCTCGTTCTGATTTCTGAGAAAGAGTTGCATAATTTGCCATATATGTTTTACTATACCAGCGATGTGTGCTAGCACACACTGCTATTTCTGTGCA  
CTCTGCTGACTCCACACTCTTTCGCTGATCTCAATGGCATACTGGATAGCTTCTCCCTTGTCTGACAGCACCAGCCGGTATTGCTGGGGTGCACAC  
TCAGCCCTCACCTTCCAGAGATCATAGCCGACTAATGAGACTAAGGATGGCATAAAAAGCGTGACAGAGATCCCTGATAGATGACAAAGTCCAATCAG  
AGTCTCTGTTTGGAAAGCCCGAGGCGGAGCATCTGCACAACTCTGATAGCTGTTTATTGTTTACCAGTTGGTGGCAAGTGGCTGCTCATGCCAGC  
TCATAATGTGGCACAATCAACAGTGGAGAGAAGAGATTTCCGGCAGAGCTCTCAGGGAGGCTGGATCTAGAGACACCTCTTATATACCTCTGAACTTCAT  
ATGGGGTCTGGTCTTTCGTAATGCTGTGAGCGCACCCTTTCTGGCTTTGAAACTCGTGTCTGGCCCTAGTTAACGGTACGTTTTCGCGAATAGAGTTGGT  
GGCTTCTACCAGCTGGACCGGTTTGTGCTGCCAGCCTACAATTTTCGGTAAAGCTATTTCTTCTTGGTGGCTGGCATGGGTTGGTGTGAATCCCCACC  
CAGATATAAAAAAACCATAAGCAGATCTTTGAGTAAGTTTTCCCGTAGTACACAAAGCTTACAATATGCTACTTTGATGTTATGCTCTGTGATGTTTGGGG  
ACCTCTCTATTTTATATATTTAAAGAAAACACATGTCAGAATCTATAATGTGGCATTCTATAGTGGCACTACTCAGGAAGACTAAAAACAGCTTGTGTG  
GATCTTAGCCCTTCAATGCAGCTGTGAGAACATTTCTCCGTTGCCAATGATGATCAAAAAAATCCCTGTATGTGGAACACGTTATGTGAAAAAGAT  
AGTATCCCTCAAATGAGGCAAGCTGAACATTTGTCAAAAGAACTTTGTAACAAGCTTTGATCATGCCGAAATGGAAGATGGCTTTATTTGTACCACA  
TTCTCTTTTGTGTCAGAAAATTTGCCAAGCTGTACACAAAGCTTACAATATGCTACTTTATACGGCTGCCAGTTCAAATGCTTCAAATAAATATC  
TGAGTATTTCAAATTTTGAAGACATTGAGGGGTTGTTTGTAGGGGAGCTGCCCCAGTCTCTGTTCTCTCTTTTTTGGGACTTTAAGTAGTGTATT  
TAGATATTTGGTGAAGTATTTTAAATGTGATGTCAGTGAACAGCTTTGACTTCTCTGAGAGCCCTACGGGCGCAGATGGGCTCTCGGTACCCGATTC  
CTGAAAAGTGTAGAGATGCGAGGCGCTAAAGAAAACAAATAGGCCCTGAAGATGATCAGTCTCTCTGCTGAGGAGTTGACATACAGCCGAGCATCA  
CTTTCAAATAGTATATGTCGATAGGGAGAGCGAGTTGCTTCAATCTTTTCACTTTCTCCAGTTCCTCCAGTTCCTCCCTGCTTGGTGAAGTCT  
GCCACATGTCATCTCTTCTTCTGCTTCTTTTGTGTGTTGTCTCTTCAATCTCCCTCCATATCTTACCTCCACCTATTTCTTCTCTGCCACCAAG  
TCCATCTCATATTGCACTGACCAACTCAAAGCCCAAAATGATGCTCTTAAATGTAACAAAACGCAAGCGAGTAAATCTAGGCAAAGCCAGAGCC  
TTAACACCAGACTCTGCTGCTGTAAGATGTCAAACCTGCCATCTCAACTAGTGTATTGCCCCCTTAGCAGCAGTGAATCCAAAGGCATTAATGATATTTTT  
TGAAGCCGTGGTGTGATGGAGTTGCAGCACAGCCTGCATAGAAAATAGAAGACGCCCTCTTCTGTGATGTAGGAGTTGGGCACTGCAGAGAACAGGGA  
GCAGAGGTTGATGCAACATGATGGGAGAGTATGAGAGAGAGAGGTTGCTAGGGGTGTAGAGGATGAAAATCATAGCCATATATATAGATATTTGCAGATT  
ATGAAAATGTTTTTCTCTTCTGAAACGGAAGACTACATTTACCAGCAAGCAAAATGTCATGACAAAAGCAAGCCCTTAAATATGTTGGATGCCAATAT  
GATAATGGGACTACAGAAAACAAATGTTTTTCTGCAAGTTTCTTGTGATATTTGTTGTAATAATTTCAATAAAAAAGCCATGGGAAGAAAAGTGGGCA  
CATTTACAGATTTCAAATATCTGTAGCAGAAGCTGCACTGCACTGAGAAAACATCTACCTTGTCTGCTTGCACGCCATCTCTCTCTCTCTCAACT  
TCCAGTATACGACAGAAACAGCTCTTTTTCAAACCTCTGCTGGCCCTTGCACCTCCATCATCCCTGACTGCCTATCTGCCATCCAGTCTGTGGTGC  
ACCTCAATGATCTCTGACTGCAAGCCCTTCCCATCAGGACCCCTGCTCCTCTCTTCTTCCGTCATATGGCTTCTCTCTTCCCTGCTGCTGCTGCT  
TCTGAAAGCAAACTTTTGGAGTCTCTGACTCCTCTCATTTCTCTCAGCTCAGGACATTTGCCAAGACTTCCCAAGACTTCCACTGCTGCTGCTGCT  
TCAAAGGAATTTCTCTCTTCTCACTTTCCAGAGAGGCTCAATGTTACCCGAGCCCTGGTCTCTCTAGGCTTACTAGTGAATAGCCTTCTCTGAA  
TCTACCATTCTTCACTCTGCGACCCCTCCAGCTAATCCAGAATAGGGCAGCCAGATTTATCTTGGCCTTAAACCCAGGAACGACATCTCTCTACCCTAA  
AAAAAGTCTTCACTGGCTCCGGTGTCTACCCAGATTAATTAATTAATCCCTGCACTCAGCAGCACAAGGCTGTCTTCACTTTACTTAAATACTCTCT  
CTTAGACGACTAGCTTCTCTGCTGCAACACTCTTGTGTGTAAGGCTTTTGTCAACAGGTTGCTTAAACAGGTTAGGTTGGTCACTTTCTAGCTGGCTGCCCC  
ATGGAACAGCCTCCCTCTCTCTGCGCTTGTAGCAGGACTTTTGTAAATCCAGAAGCTCTTAACTTTTCTTACCTCTCTCTCTCTCTCTCTCTCTCT  
TCTCTGATAAATCCACAGTGTCTGTAATGGTGTCCAGGGCTTATGCACTGTTGGGCCCCGCAAGCCACCAAGCTTCACTTCTCTCTCTCTCTCTCTCT  
CTCTTGCATTTGGATGGAACACTTCCAGCCAGAGGTTTCACTTACCCCTTACCCCTTGGCAATGAGTACACTCAAGAAATGATGACTCTCTCTGTT  
GGCTTACCATGACTCGGATCCCGACACTTACCCTCTCTGCCCCCTTCTTGTGCTGACTTGTCTGTAATCTCACAGCGCATAGTAGGTTCTATCC  
TTTTCTTTTTTCTCCACTGCTCTTAAATATTTGTTTGTAAATGTTTCACTCCCTTGTCACTCCCTTCTCTCTGTTGGTGTCTTGAACAGTATTT



TACTTGCTGATTAAGTGCCTAACAGCAACAATAAATCAATAAAAAATAAAGATTGCTCCTTCTGACGGTCTGTACTCCTTTCTGTGCTGGCCC  
AAGTGTGCATCAGCAACCAATTTAAAATGAGATGCCGATGCAGGCCGATCTGTATAGCTGCTGTTGCAGCACAGAGCACACTGCTCTGCCAAGTCAAAA  
TCAAGCCCTGAACCTGGCTAATACTCTCCTTCTCCTCCACCAACTTTTGTGCTGCTGACTCCCTCCACAAGGAGCAACTTCTTTAGCCATGATAAAATG  
TCATTACCATTAGTGTCTTAATAGCGATAATGGCTACTTGGGAAGGCTATGCCAGCCTAGGAACGGCCAAACCCGTGGCAATGCCCTGGCTACGCTTAG  
GTCATTACATGAGGGGGGGGGAGAGGGGAGCAACAATTTAGTGCATATCATCAAAAGTCAGATAAAGTTTTACATGTATGAAACACAAACAAACAGG  
TTATAATGTGAAAATGTATCTACATACATAGACTGTATAGACCTTGTATGCGCAATGCAACCACAAAGTAAAGATGGTACTTCCCTTGTTCCTT  
CTTCTACCCTTGAACCTCAGCGCAATGGAGAGCGTGTTTTAAACCAATGACTTGTGAGCAACCAATGACGCTGATGCAAGCATTTTGTATGATAAATCA  
ATAGATGTCTTGTCTATCTCTCTTACAGCTGCTGTAGACTACTTGGCTAAGAAGCTGAGCTTGTGCGACACAGAGGAGGATGAAGCTCGGGGACCCT  
CAGCCGTCTGGGTTTCTCTCTCTGAGGACGATGCAAGGACATCATTCAAGGCCACTTACCCTTTACGCTTAACCTCCAGGCAACCAAGTGTATGGCAGCCA  
GTATCTACATAGTGTATGAATGGACTGACAGACGATCTTTTTCCATCGATTGCTCAGTAATTAAGTATGTTTGTATATATATATATATATATATGTA  
ATCTTAAACATTTGATAGGAAGAAAACCTGAGCAATGAAAATGATGTGTTTACGTTGACCACTATAAATTTGGACCAAAATGCAATCCAGAGAAAGTGA  
CATTACTTCCGCTCTCTAAAATACCCGTTACCTATCCGAGACGGAGGCCACTAATGAGCCACCTAATTTCCGTAATTTATGATTAAGAGAGTAC  
AGACTCTGGAGCTAGGCAATGGACATATGCCCTAACCGCACTGCTTGGACTTAATGATGCTGTTGTTGATACATAAAGTCAACATAAAGTATGGCAAC  
CTATTTCTGTCTGACAGGACTACTGGCAGTGGCAATGTATTCAATGATGCAATTAATAGTCCAGGACTGCTTGTGACTTCTCACCCCTTCTCGTATTCCAG  
CCGTGATATTCCAGGTTAAGCATTCATAAATTTGGTGTCCAGCAGAGGCATTTTGTGGCTAGGGTCGGTCTGCCAAAGAAATGTGCTTTATAATTTCA  
TCCACTTTCTCCTCAGTGGGTGCGTGTCTTAAATTAATAGCTAGGATAGAGATTAATCAGACTGGTGTAAATGTCAGACTAAGTCAACATAAAGTATGGCAAC  
AACTCTTCGCTTACAGCTCATCTTCTGCTAAATCTAGTGGCTGGTTGCTGTATTCTATATTTGATGTCATGGAGTATACAACCTATGTCTTTGGACCCA  
AAGGAAGAGCCCTGGTCTATTCTGTAGTATGCTCATGCACATTTCTTACAGTAGTGTGGCAGTGGAGGGTGGGTCATAAAGTATAGGACACTT  
TGCAAAAATGCTGAAAAGATTTGAGTTGTAATGGCTATTGAGGGGAACCGTGGGAAAGAGGTTGTGTAACATTTTAGGATAAATGGGAATAATGATTAC  
AGTGGTTCCGCGAGGAAGAAACACAGGAAGCCAGCAAGCCGCTTGGTGTAAATTTAGTATTAATGGTCAACTAATACCACATGTATGGCAGCCA  
ATTTTGGCTCAGTGTGTATGCTGCCACTGCTGCCCTGGGGTCTGGGTGGAGAGCCTTTGACCAAGACTGAACTGTCTGTAGAGTGTCTCTCTAAG  
AGTAAAAGTGGCATAAAGAACGAGACTTTGAAAATGCAATTCCTATCTAATTTGTAACCAAGCAACTCTACTTGGATGCTAAATTTATGCAAAATAACCGCAG  
TCTAATGCCCAGTGTAGGTACACCACTGCTCTAGTCTCAATGCGGAAGCTAGCCAGAGAGGGATTTCCATGGCTATAATACAGAGTGTGGGTTGC  
AAGAAAACAAAATGTGGAAATGATGGAGGCAATGCTGCACAAAGTGTGTGCTGGTGTGGGAAGAATAAACCAACCAACTAATACCACATGCATAC  
CTTCTCTATGAAGCTCAAACTCAGTATTTTACCACATCTTACCATCCCTCCACTTTTCTGTAAGTGTATCAGCATGGTAGAAGTCTTTTCGAATTTGGT  
GAGAAAGTCAAGTGCAGAACATACACAGATACCTTGGCCATCTCACACCACACTTAACATTTCTAGATATCTGTTTTGACCCATTCTGAGTTGTCAAT  
CAGCTCACAGTGTAAAACAGTGTCAATGACATCCATTTGAGAGTGGGGTGGTGAAGTGTCAACCTTGTGAGCTGTAGGGGTGATGCACT  
AAGGAAAAGAGAGGTAATACCAAGCAACCTTGTGAGTTAGAACAATGGAGTGCATATTTGATTGTTGCTTCTGTATCAAGTCTTTTAAAATCAA  
CTTTCAAGATTTGATACACTTCAATGCCCTTATGCTCATGCAATTTCCGAATATTTTATCTGCAGAGGTTCAATTTCTGGGTTGTCTTGAACCAAAAAGG  
GGTTGCTCTAGAACTCAACAGCCTTAAAAGGCCAAGACATAAAGGACCCCTTTAGAAGAAATGATAAAGCAATCTTCAAAACCTTTGAGAATTTCCA  
TTATCATATCTCTAAAATGGGGTTATTAGTAGCAAAAGATCAATATAGTGTAACTAGAGAAAATCACTCAAAATAGTAACTAGTCTTAAACAAGTGC  
CAAGAAAAGACTGAGCTCTGTGTGAACAGGCTTTACCTGTGACTGATCTCCATTTGCAAAAGTCCATGCCCTGAATCACCGTAAGAAAATTAATCAGAGG  
TGCATTTGTCGCCCTACAGCCTATACTTCAAGTTACACAAGCCTGTGCTGCTTTTGTCTCTGTACCAATAGTGCCTGGTCTGATTAAGATTTGGTCTGCT  
GGAATTTCCACCACCTATGTGCTAAGAGCCACAATGAGGCTGGGCCCTGGCATTGCCATGTACAAAATGGTGTAAATAGCGGGACCCATGAGATTTTGTG  
TACAGTGGAAATCTTTTCTGTGGCGTATGTTTCATAGAAAAGCAATGTTTTATACATCAATGACTACCGGTGCAATGAACTGAACAGACAGCAGTGAAG  
ATTCAGTGTGTAACCTTTGTTTTGAAAATGCATTCAGACTGTATTTTTTAAATGTTGTGTTTATGTATAAAAATGAAATGACGTTTTATTCATGGAC  
TGGCAATCTCCCTTTTGTCTAAAAGAACACAAAATGGCAACTTCCCTGATAAACAATTTTTGAGCGGAGCCCGATGGACTAAGGGGAGAGGTTGGCAGG  
GCCACATGGCGCCATTTGAAGAAGAGGCTTCAACCCATTTCAAAATCCAGAACCTTCTGCTTGTGCCAGTACGACAAGCGGGAGGCTAGTTGGA  
TGGCGCTTTGGCGCTGGACAAAGGCAAAAGGTTGGCGTCCAAGCAGCAACCAAGAGATAATGGATTTGGTGTGTTTTCCAGTGTGTTTTAACTCTC  
TGCCGAAGCAGTATGGATACTCACCTCACAGCAGTCCAGCTTCAATGGCACTTACCAAGGCTCAGAGACTTATGTACTGTATGGTTTTAACCTTCC  
AGTGACACCAGCTCCATGACTCACCTGGAATAGCTACTAGACTGTATAAATCCGTGTAACTTGAACCTGCGGATCTGACGCTTCTGTGTTGACTC  
ATAGCCATTTCACTCCACTTGTGAGTGTGGTGGTGGCTGTGGTGTGAGTGTATGTATATAATCTCACCATAAATTTATTCAGTATAT  
GGCTAGTAGAGTAGAAAAGAGAAAATGGTATTTGCTTCAATAGCCTGCTTGTAAATGTTCTTCTTGTGTAACCTGGCGCTTAACTATACATAAAA  
GGACAGGATTAAGCAAGCACTGGATCACTTATTTGTTTTACTCAACAAATCCAGGGTTGCTTTGAAATGCTCATCGAATCACTATGTTCAGATCATCT  
ACATAGACTTCTCATCTTCTCATTTTTGGCATTGTTTCATCTGGTGCAGTCTGGAATGTATAAATTCAGCTAGTCCAGAGCAGATAGGGAATATCTG  
GTGCTACTTTGCTGCTTGTCTTCCAGTGGACAAAAGCACCATTACACATGTGGTCACTATTTCCAGCAATCCCTTATCAAGTATCTGCCACCTTTCT  
TTTTCAAGTAAAGCCGCAAGCTGCAACTTCACTTCCAGTGTCTCAGATGGAGGAGGCTTCTTTCAGGAACTGCTTTACGGAACCTTAAACCTCACATTT  
CCCTGCAGTGTCACTTAATGCTATCATCTAGCAATCAATGGTTCTTGTATTTACTGATGCTTCTCAGTCAAACCAGACAATAATGTATCTTATTTATTTT  
TGAGGTTTTGTATAGCGGCAACTTCAGAGTGTATGAAAATACCGTGGAGGGAAGAAAGGATAGGGAAGACTTAGAAAATGAAAGAAACAAAGTCAAGG  
TTTTCCAAATGTTGAGTGACAAACATACACATCTTGTAAAAGCAATAATTTCCCACTAGTATAAAGAAGTTATAGCTCTAATTAAGACACAGAGGCAAG  
TATTATACTTCACTTCCGTTACTGAAAAGCTTCTGCAGCAAAATCAAAATTAACAGTAAAGACTACATTTCCAGCTTCAACCTCTCGAGTCCAGTT  
CCTATGAGTATTTCTCCATAGCTACACAGTTCCTCTTCTTGTCTGTGGTCAAGTGAATGAACCAAGAGACAATAAAACCTCAGCCCTGTGAATA  
GCCATACAGAACTGAACAAAGTCAAAGACGAAAAGGACAGCTTAAACCAATCCAGCTTAAAGGTTGGACACCCATCAGGATACCATGGGACAGCTCTAG  
GAAAACACAAAATACTATATCAGGGTAGGAAATTAATACGGAAGCAAGGGGCAATTTAAACAGCATAATCAACCAGAACATCAGGCACTTACATACAA  
AGAAGGGTAAGGCCATAACCACCTCTGTGCTTTAATAGAATTTGGAACCTCCCTTGTACTACATACATAGCATTGGGAATATAGATTTCTTTGCGAGACAAG  
AAGACAAGGATGATGCTTGTTCAAAACACTCTGCTCACCAGTGTATGCAATCGGCTTTAAAGCGAATTTCTTAAAGACTGATATAGCCAGACACTTTGCTGC  
TCTCATGATGCTCTCAACTTGGGCTCTCAACAGTAGGCTTTGCAATGCTTTGGACTTTGGTGTCTTCTTGGAGAAATGAGTACCAAAACAGACATCAA  
ACCCAGCTTGTGTTGATGACCACTGGACCATAGACAATGTGGGGGCTGACAAGTCCAGAAAGGGTGTCTGAGTCCATAATAGCTGTGTTGCTTCCCTT  
GCCAGTAGGGAACAGTTACCAATTTGTACTGCTTAAAGTAAACGATGACACACAGGTTGGGGGAGACGCTAAAAGCTGGTAAAACACTGATTTGAATGCC  
ATTTTAGTCTCTTCAAGACAGAGAAAACAGAGTCTGATGGGGAGTAGACTCTCTGGGTATCTTTCCAGAGACCTAAACATTTGAAAACAGCAACATGGCAAG  
TCCAGAAGAGAGTACTTCAAAATCAGACAGCTTAACTCTCTATCTTGGCTGGAAGTAAAACAGCATTGACTTCTGTGGGATGTATTAACCTACTCA  
TCCAAGCCCTGCAACATCTGCTGATTTGCTGGCAGCGGAAACATCAGAATGGCCAGTGGAAAGCATAATGCTGCTGCTCAAAATCACTTATTTAGTGAACA  
CAGGAGATCAATGCCATAAACACCATTGGGCTACCCACAAAACAGCATGAAACCCTTGGAAATAGCAATGCTGATGCAAAAAGAACAGAGCTAGCTTC  
CAAAAAAATCTTTCTTGTATTTCAAAAATTTGCTAAAATCATGGCTCACAATACCTAAAAGATCCAACCTCTTTGTTGTGTTCCACATTTACTCTGC  
TGCAAGAATCCACATCAATGCAATGCTCAGCAAGAATCATATTTCTAAGCAAAAATCTTTTAAAGATACGATGAAAAGACAGCTGTCAAAAATGGGT  
GCAATACCTGATCTCAACACTACAGCAAGCAAGGCTTTTAAACCTTTTCTTGTAAAAGTGTAAAGTGAACAGGGAACCCCAACTTCCGCAAAAGACCTGCT  
GATGGGTGGAGCAATGTAACATATATTTCTGAAATGACTTTGAAGGAAGCAATGTTTAAATGTATGTATTAATAATGTGGGTTATATTTGAAGAAGAGAC  
ATTTGTAGACATTTGGTTGCAGAGTTACAAAAGTGTCCACACTGGGATTAACAGATTTCCACACTTTTCCCTGGACAAAAGAGCTTCTCTGTCTCTG  
GCCAAGAGATTTGACAGACTGAGCAAGAACTAGCCAGGCAAGCCGTGGCAAGTTGCTCTCAGTCAAGCAATGATTTCTTTGGGATGAATGAATAAT  
GCTGATTTGGGTGTGACTAGTCAACACTGCTCTGGGAGAGACAGGACATGTGACTCTGAGGAGCCAAAGCTTCTGGGGGTGGAGACAAAACCTTGTGTG  
TATTGAATTTGAAGCAAAATATATGTTTTATAAATTTGCTATAACAAATTTTACCAAGTGCACAAAATATGAAACTTTGGGATTTTAAATGACAAAT

CCACTCACAGTTTAAAGACTAAGCTGGATGCTGTGTGATGTTCTGAGGCCAAACCCCTGAATTTATTAATATTGCAGCTGTAGTGTTTTTGCTATAAACATA  
AGAACTTACAGTAAATATGCCAGGAAGGATCTGCATGCATGTATCAAATCTGGTGCAGAACCAATATTCGCAAAACCCAGCAAAAGCGCGAATAAGTTTTCA  
TTTTCTGAACCCAAAGCACGTAGGAACATGGGACTTGAACAGAGACATGCCTTGATTAATTTGTGATGTGTGATGTATTAATGAACCAACTGTATATCTGGGA  
AATATGTTTGTATGAAAATTGATTTTCTAAGTATAAGCAAAGGGGCGTGTCTTTCCTAAGCCATGATCATGACACCTGATGACACAGGATGACACACTA  
CTCCCTTCTGCAGTCAGGCGACAGAAAATTTCTAACCATCAAACCTTAGGGGTTGGGCATGTAGAAATCAGCCTCCACACCCACTTTGAAAACACATAA  
AACGAGACTGCCTAGGACAGATAGGACTCATTTTTTCCACTACTCACCAGATTCCTGCGAAGCACTCTGCCGGACCAGATCCAGACAATATCCAGATAGA  
GACTCCAGAACACAGAGGGGTGAGACCTGTCCGGGTGAAAGTGAAGCCAAACCCCTTGACCAGATCTTTGACGGGGCATTCCATTCCAAAACCTAGGAGT  
GAGTATCTAGTCTAGAACGTACAGAGCCAATCTCTTAGTTTAAAGTAATCCTCTTCCATTCAATTTCAACCTATACAGAAGTGCATTATAGAATCCTGTGT  
TCATCCTGTGATTTCAAATCTGTAAAGGCCATCTGTCAATTTGAAATCTTGACTTTATTTCTGTAATCTACCTCCACAAAACATCTGTATCTTTTGAA  
CCACACGTCCTAGAAGCGTAATCAACTGTCAATTTGTAAGCTAAGATCCTAAGCTGTCCAACAAACCTAAAACGACATTTCAACTGTGTGTGTGTGTG  
ACCTAAAACATCCAAAAGTAATCTCAATTTATCCTGAATCTCTTTTAGTGAATTAATAATCAATTTCCAATTCCTTTTAGTTTTCCGTAATCCGCAATTTACGCA  
CGTGGAAAAGTTGCAGCGAATTTGCAATTTGGCTCAATTTACCACATGTTAAAATAGCTGTCTCTTGCTTACCCTGCTGAATTTTCGTTTTCCATCTGATA  
ATCATTCAATGAATCATTGCTAGTGTGAGCTAACTCACTCAAAGTAATCTCATTCATCTCCTGAATCTCTTTTAGTGAATTAATAATCAATTTCCAATTCCTT  
ATAGTTTTTCCATAATCCGCAATTTACGACGTTGAAAAGTTGCAGCGAATTTGCAATTTGGCTCAATTTACCACATGTTAAAATAGCTGTCTCTGTGCTTA  
CCACTGTGAATTCGTTTTCCATCTGATAATCATTCATGAACTAGTGTGACTTTGACTTAACTCACTCAAAGTAATCTCATTCCTCAATCTCTTT  
TAGTGAATTAATAATTTTCGCATATTTTCCATCCATGCAATCACATTCAAAAGCAATTTTGACTGTGTTTTTCTCTAAACTTGCTGGGGAACTGGAA  
TTGAACTGGATTTGATTTGATTTCTCTGAAACCTGTGTGCCCTCATGTCCACCTATTTCATATTCGCATAGGGGGGAGTGAATAGTACAGGGGAAAACGTG  
TACGATTTGACTTAGTTGGATTGCTGGATTGAAGTCACTTACAGATTGGGGCTCGGTAGCGGGGATCTGGATTAGATCTACCCTGTGCTGAGCTTAAATA  
GTATCCTCCACATTCATACTCCTAAGTATTAAGAGAGTGTCAATTTTGAATATTTACCATTGTTGATTACCGTCCATATGATAAGTGTGATATTCAG  
ATATATTTGGTTCATAAAGTGTGATATATATATTTGTTAAATCTTCAAATAAATCTTTAAATTTGCAAAACAAACCTACTTCTTGCTCAGTGAAGTACAGG  
GGGATTCAAAAGAGAGGGCGTTATATAAGGGTTCAATCAACCAGATTTAACGAACCTTGACATAAAAATATATAAAACAAGGGCTTCCATTTGGGCATCCCATCC  
TACGATTTGACTTAGTTGGATTGCTGGATTGAAGTCACTTACAGATTGGGGCTCGGTAGCGGGGATCTGGATTAGATCTACCCTGTGCTGAGCTTAAATA  
CAGTGTGCTCACTAATAGGATATATAAATCCTGTTGGCTACCATGCTGTGTACGCTGTAAGCAACCCCTCAAAGAAAGCTCTCAGGAAATGGTCTG  
TTTTGCAAAATAAATAACAAACTTCTGTAAATCAGGAAAGAAATCAATTTCTGGAATGGCGACATTTGGTAGACATCAAGATAGCTAGAGAGACCTTTGC  
GTAAGTTGTTGTGAGAGGTGAATGGACTGAGCAGGACCACAATGTGTGGTTGCAGGCAATCACACCACAGATCACTGCAACTGGGTAGATATCTGGAAA  
GATCAGGGCCCTTACAAGTGGCCCTGATGAACCTATATATGGCCCCGAAGGCCAAGGATGAGCATGACAAGATTGTTAGGATAGCGGCATATTTATATTTA  
TATATGGGAGCCATACAGGACAAATGTGCTGAAGGCCAAGACCTGGCAAGTGGCATTAGAGAAGGCCAATCTGACCTGGACTTCTGAGCAGAGGCTGC  
AGAGGAGCCAGGAGTCAGAAAACGAAAGTAGGACGATACATTAATAATCAAAGAGGACATGCGTATCCCGAACAGGAAAGGGCAGACCAGGATACCAGA  
ATTTCTGGCTTGCAGAAGGAGTACCAAGAAGGTTGGACTCCCTACTGCAGAGCCAGAAAAGCTGGAGCAACAACCTGGATTTCAATAGGGCATGCACAGA  
GCAGGTAGCCACCTGCAAAGCCATCTAGATAGAGTGAAGCCAGAGAGCAATAAGCTGATTTTTGAAAAGACCTGGACACCCAGGACAGCTTGTAGAGAGCG  
CGCCAGAAAACCTGGTGCCTTCAAGGCAGAGGACGACCTGGTGGCACAGAGGCAAGCTTTACTCAGGAAAGGATACCTTAGGCCAGGAAGTCTGCACTT  
AAAAGGGAAAGCTGGAAAGAAATCACTGGCCCTCCAGGTGCTGGGTGACCTCCAAAAGAGCATCAAACCTTGTAGAGCACACCAGGAGGGTGGAAAGATG  
CTCCGGCCAGTAGCGACGGGACCAGGAGGTAACCCCTCTGCAGCAAAGACTGGCCAGTTACTCCAGGACCAACCAGGAAGCACAGAGGAAAATGAAGC  
TCTCTGTACAGCAATGATAGGCTCCAGCAACAGGTAGCATGCAGAAGAGAATGATAGAGTCTAGTAAGGCTTGTATTGAGGAACTGAAAGCCAAAGGCTCT  
TGATGGCAACAGGGAGCAGCGGTGATAGAGATGAGGTCCGCTGGGAAGGGAAACCTGAGCATAAACCCTAGGAGCCCTAGTACCAGAGGCTTCACTCT  
CTCCAGTCCCTGGACTCTGCCACCCCATGTCCCTGGCGCACATGAGCCAGGGCCACGGGTATGGCAGATTAATAATCCAGCCAGAAAGTATGGGGTCA  
AGGCCAGTACCTCCAGGAATGGATGGGCGGGGCACCAAGTACAGTGCAGTTTGTGGGGAACCCCGGAGAGTAGGCCACTAAGGGCATCTGAAAAC  
CTGCCCAGTTAGGTGAGTGGGGGTACCATCAAATCCGGGCAGCAAGGAGGAATCTGAAGACTCTCTGAAGCTCCAGGACACAAGAGACTAGGTGCC  
ACATTTCTGCAGCCATTTCCAGGCTTGCAGAAAACCGGAAAACCTGGAAGATCAGACAGACACCTCTGGGAGCAGTGTCTTCTGAGTCAAGAGGATGAATGGA  
CCAGGGTTACCCGAACCAAGAAGGCCAATAAGGCAAAAAGGGCTTGTCTAAGGACCCCTTAAAACAGATCAAAGCAATAAAGAGCGTCACTACTCTTAT  
CATAAAGAACTCAAAGTACTGTTTGGGAACACTTGGAGCTCTTTGAGCAAAATGATGGAGACTTTCCATTTGAAAAGACAGCAGTAGCTGCATTCAGTACGT  
AAAATGGACATTTCCCCAGAATACTCTAGTTTCTTTTGGGGGCTGGAGGACCAAAATCAATCAAGATGGTCCACATATAGGGCGGCCATCTTGAACAC  
TTTTCTGTTACAGGAAATCCCCAAGAGCTCGCAAGGCAGCCTACAATTTGCAATGTGGGAGGATCAGGCCCCACAAGAATTTGTGAGGAGTTGAAGCG  
TGCTTTGGCAGACTTCCAAAAGGTTGAGCAGGACAGTAAAGAATTTGTAATATACATTTCCATGCCTTACCCAAATACATCATGACCCAGCTAGTGA  
GAGATTTTCATGAGAAAAGGTTAGACTGGTCAATGAAACAGGCCACCAGTCTATGAGGTGCAGAAGCCATAGAAAATAAAGTAATGCTCAGAAAA  
GCCCAAACCAACCAGCACCCCTGCTGCTGCCAAGGTGGCAGAGGTAAGGTTGCCCCATTTTAGATTTGGAGATGGGGGCTAAAACCTGCCTGCACA  
GAAATAATCCAAGCCCAGAAGGCCCTCAGGCCAGTACAGACAGGGGCAAGGAGGTAGTCCACAAAATGGGGTCTCCTCCTCCCTGGCTATGTAAGTC  
CCTGCTACAAGGAAAACGACCATCCCTGGGTTATGTGTGACTCTCCAGCCCAAGGGGATCCAACCAAGCACCTAACCCAGGAACTTCCCTCTTA  
CTTCCCCAGGAGGCGAGAATTCAGAAATCTTGGGCAAGACTTTTTCCCTCCATCCAC
