# Supplementary material
Source: PubMed Central journal article supplement (PMC5703281)
Supplement: pnas.1706855114.sd02.pdf [file pnas.1706855114.sd02.pdf]

CCCTGCCGTTACCGGATACCTGTCCGCCTTTCFCCCTCGGGAAGCGTGGCGCTTTCATAGCTCAGCTGTAGGTATCTCAGTTCGGTGTAGGTCGTT  
CGCTCCAAGCTGGGCTGTGTGCACGAACCCCGCTTCAGCCGACCGCTGCGCCTTATCCGGTAACTATCGTCTTGAGTCCAACCCGGTAAAGACACGACTT  
ATCGCCACTGGCAGCAGCCACTGGTAACAGGATTAGCAGAGCGAGGTATGTAGGCGGTGTACAGAGTCTTGAAGTGGTGGCCTAACTACGGCTACACTA  
GAAGAACAGTATTTGGTATCTGCGCTCTGCTGAAGCCAGTTACCTTCGGAAAAAGAGTTGGTAGCTCTTGATCCGGCAAAACAAACCACCGCTGGTAGCGGT  
GGTTTTTTTGTGTTGCAAGCAGCAGATTACCGCGCAGAAAAAAGGATCTCAAGAAGATCCTTTGATCTTTTCTACGGGTCTGACGCTCAGTGAACGAAAA  
CTCAGTTAAGGGATTTTGGTCATGAGATTATCAAAAAGGATCTTACCTAGATCCTTTTAAATTAATAAATGAAGTTTTAAATCAATCTAAAGTATATATG  
AGTAAACTTGGTCTGACAGTTACCAATGCTTAATCAGTGAGGCACCTATCTCAGCGATCTGTCTATTTTCGTTTCCATAGTTGCTTACTCCCGTCGTG  
TAGATAACTACGATACGGGAGGGCTTACCATCTGGCCCCAGTGTGCAATGATACCGCGAGACCCACGCTCACCGGCTCCAGATTTATCAGCAATAAACCA  
GCCAGCCGGAAGGGCCGAGCGCAGAAAGTGGTCCGCAACTTTATCCGCTCCATCCAGTCTATTAATTTGTTGCCGGGAAGCTAGAGTAAGTAGTTCGCCAG  
TTAATAGTTTGCACAACGTTGTTGCCATTGCTACAGGCATCGTGGTGTACGCTCGTCTGTTGGTATGGCTTCAATTCAGCTCCGGTTCCTCAACGATCAAGG  
CGAGTTACATGATCCCCCATGTTGTGCAAAAAAGCGGTTAGTCTCCTTCGGTCCCGATCGTTGTGAGAAGTAAGTTGGCCGAGTGTATCACTCATGTT  
TATGGCAGCACTGCATAATTTCTTACTGTCTATGCCATCCGTAAGATGCTTTTCTGTGACTGGTGTAGTACTCAACCAAGTCATTTCTGAGAATAGTGTATGC  
GGCGACCGAGTTGCTCTTGGCCCGCGTCAATACGGGATAATACCGCGCCACATAGCAGAACTTTAAAAGTGTCTATCATTTGGAAAACGTTCTTCGGGGCGA  
AACTCTCAAGGATCTTACCGCTGTGAGATCCAGTTCGATGTAACCCACTCGTGCACCAACTGATCTTCAGCATCTTTTACTTTTACCAGCGTTTCTGG  
GTGAGCAAAAAACAGGAAGGCAAAATGCCGCAAAAAAGGGAATAAGGGCGACACGGAATGTTGAATACTCATACTTTCCTTTTTCAATATTATTGAAGCA  
TTTATCAGGGTTATTTGCTCATGAGCGGATACATATTTGAATGTATTTAGAAAAATAAACAAAATAGGGGTTCCGCGCACATTTCCCGAAAAGTGCCACCT  
GATGCGGTGTGAAATACCGCACAGATGCGTAAGGAGAAAAATACCGCATCAGGAAATTTAAGCGTTAATATTTTGTAAAATTCGCGTTAAATTTTTGTTA  
AATCAGCTCATTTTTTAACCATAGGCCGAAATCGGCAAAATCCTTTATAAATCAAAAGAATAGACCGAGATAGGGTTGAGTGTGTTCCAGTTTGGAACA  
AGAGTCCACTATTTAAAGAACGTGGACTCCAACGTCAAAGGGCGAAAAACCGTCTATCAGGGCGATGGCCACTACGTGAACCATCACCTAATCAAGTTTT  
TTGGGGTCGAGGTGCCGTAAGACTAATCGGAACCTTAAAGGGAGCCCCGATTTAGAGCTTGACGGGGAAGCCGGCGAAGCTGGCGGAAAGGAAGG  
GAAGAAAGCGAAAGGAGCGGGCGCTAGGGCGCTGGCAAGTGTAGCGGTACGCTGCGCGTAACCACCACCCCGCCGCGCTTAATGCGCCGCTACAGGGCG  
CGTCCATTGCGCAATTCAGGCTGCGCAACTGTTGGGAAGGGCGATCGGTGCGGGCCTTTCGCTATTACGCCAGCTGGCGAAAGGGGGATGTGCTGCAAGGC  
GATTAAGTTGGG
